# Supplementary material
Source: PubMed Central journal article supplement (PMC3202687)
Supplement: NIHMS331049-supplement-3_si_003.pdf [file NIHMS331049-supplement-3_si_003.pdf]

# Divergent Synthesis and Chemical Reactivity of Bicyclic Lactone Fragments of Complex Rearranged Spongian Diterpenes

*Martin J. Schnermann,<sup>†</sup> Christopher M. Beaudry,<sup>†,§</sup> Nathan E. Genung,<sup>†</sup> Stephen M.  
Canham,<sup>†</sup> Nicholas L. Untiedt,<sup>†</sup> Breanne D. W. Karanikolas,<sup>‡</sup> Christine Sütterlin,<sup>‡</sup>  
Larry E. Overman<sup>†,\*</sup>*

<sup>†</sup>Department of Chemistry, 1102 Natural Sciences II, University of California, Irvine, CA 92697-2025. <sup>‡</sup>Department of Developmental and Cell Biology, 2011 Biological Sciences III, University of California, Irvine, CA 92697-2300

## Table of Contents

|                                                                            |            |
|----------------------------------------------------------------------------|------------|
| <b>Chemical Materials and Method.....</b>                                  | <b>S2</b>  |
| <b>General Information Regarding Chiral Starting Materials.....</b>        | <b>S2</b>  |
| <b>Synthetic Experimental Procedures.....</b>                              | <b>S4</b>  |
| <b><i>In situ</i> Observation of Pyrrole formation with 13 and 14.....</b> | <b>S14</b> |
| <b>Lysozyme Modification.....</b>                                          | <b>S15</b> |
| <b>Hydrolysis Studies.....</b>                                             | <b>S19</b> |
| <b>Golgi Modification Procedure.....</b>                                   | <b>S20</b> |
| <b>X-Ray Structure of 46.....</b>                                          | <b>S21</b> |
| <b>X-Ray Structure of (S)-51.....</b>                                      | <b>S22</b> |
| <b>NMR data tables for selected compounds.....</b>                         | <b>S23</b> |
| <b><sup>1</sup>H and <sup>13</sup>C NMR Spectra.....</b>                   | <b>S27</b> |

## Chemical Materials and Methods.

Unless stated otherwise, reactions were conducted in oven-dried glassware under an atmosphere of nitrogen or argon using anhydrous solvents (either freshly distilled or passed through activated alumina columns). Titanium(IV) chloride and methylene bromide were purified by distillation. TMEDA, benzylamine,  $\text{BF}_3 \cdot \text{OEt}_2$  were purified by distillation over  $\text{CaH}_2$ . All other commercially obtained reagents were used as received. Reaction temperatures were controlled using an IKA Mag temperature modulator. Thin-layer chromatography (TLC) was conducted with E. Merck silica gel 60 F254 pre-coated plates, (0.25 mm) and visualized by exposure to UV light (254 nm) or stained with anisaldehyde, ceric ammonium molybdate, potassium permanganate and iodine. Flash column chromatography was performed using normal phase silica gel (60 Å, 230-240 mesh, Merck KGA).  $^1\text{H}$  NMR spectra were recorded on Bruker spectrometers (at 500 or 600 MHz) and are reported relative to deuterated solvent signals. Data for  $^1\text{H}$  NMR spectra are reported as follows: chemical shift ( $\delta$  ppm), multiplicity, coupling constant (Hz) and integration.  $^{13}\text{C}$  NMR spectra were recorded on Bruker Spectrometers (at 125 or 150 MHz). Data for  $^{13}\text{C}$  NMR spectra are reported in terms of chemical shift. IR spectra were recorded on a Varian 640-IR spectrometer and are reported in terms of frequency of absorption ( $\text{cm}^{-1}$ ). Optical rotations were measured with a Jasco P-1010 polarimeter. High resolution mass spectra were obtained from the UC Irvine Mass Spectrometry Facility with a Micromass LCT spectrometer. See *JOC Standard Abbreviations and Acronyms* for abbreviations (available at [http://pubs.acs.org/userimages/ContentEditor/1218717864819/joceah\\_abbreviations.pdf](http://pubs.acs.org/userimages/ContentEditor/1218717864819/joceah_abbreviations.pdf)).

## General Information Regarding Chiral Starting Materials.

Silyl ketene acetal **28** was obtained from (5*S*,6*S*)-5,6-dimethoxy-5,6-dimethyl-1,4-dioxan-2-one.<sup>1</sup> (5*S*,6*S*)-5,6-Dimethoxy-5,6-dimethyl-1,4-dioxan-2-one was synthesized from (*S*)-3-chloropropane-1,2-diol via a four step procedure reported by Ley and coworkers.<sup>2</sup> The diol was obtained from hydrolytic kinetic resolution of epichlorohydrin.<sup>3</sup>

Enone **29** was obtained from Swern oxidation of (1*R*,4*S*)-4-hydroxycyclopent-2-en-1-yl acetate.<sup>4</sup> (1*R*,4*S*)-4-Hydroxycyclopent-2-en-1-yl acetate was obtained via two different routes, the

- 
1. Ley, S.V.; Dixon, D.J.; Guy, R.T.; Rodríguez, F.; Sheppard, T. D. *Org. Biomol. Chem.* **2005**, *3*, 4095.
  2. Ley, S. V.; Diez, E.; Dixon, D. J.; Guy, R. T.; Michel, P.; Natrass, G. L.; Sheppard, T. D. *Org. Biomol. Chem.* **2004**, *2*, 3608.
  3. Schaus, S. E.; Brandes, B. D.; Larrow, J. F.; Tokunaga, M.; Hansen, K. B.; Gould, A. E.; Furrow, M. E.; Jacobsen, E. N. *J. Am. Chem. Soc.* **2002**, *124*, 1307.
  4. Hughes, C. C.; Miller, A. K.; Trauner, D. *Org. Lett.* **2005**, *7*, 3425.

latter of which we found to be operationally less complex. The first route involved a photochemical [3+2] cycloaddition of cyclopentadiene to give (1*R*,3*S*)-cyclopent-4-ene-1,3-diol.<sup>5</sup> (1*R*,3*S*)-Cyclopent-4-ene-1,3-diol was acylated to give (1*R*,3*S*)-cyclopent-4-ene-1,3-diyl diacetate which, after resolution with electric eel acetylcholine esterase, gave (1*R*,4*S*)-4-hydroxycyclopent-2-en-1-yl acetate.<sup>6</sup> The second route involved monoepoxidation of cyclopentadiene to give 6-oxabicyclo[3.1.0]hex-2-ene.<sup>7</sup> The epoxide was opened to racemic 4-hydroxycyclopent-2-en-1-yl acetate, which was further acylated to (1*R*,3*S*)-cyclopent-4-ene-1,3-diyl diacetate.<sup>8</sup> The (1*R*,3*S*)-cyclopent-4-ene-1,3-diyl diacetate was resolved enzymatically with Novozyme 435 to yield (1*R*,4*S*)-4-hydroxycyclopent-2-en-1-yl acetate.<sup>5c,9</sup>

### Synthetic Experimental Procedures.

**Synthesis of *t*-Bu-MacE (13).** Experimental procedures and characterization data for the synthesis of **13**, **14**, **22**, **24**, **25**, **26**, **30**, **32**, **33**, **36**, **41**, **42**, **44** can be found in the *SI Appendix* of reference 10. Improved synthetic procedures follow for **24** and **22**.

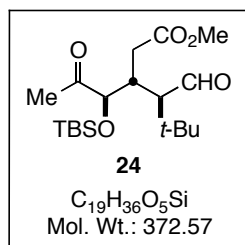

**(3*R*,4*R*)-Methyl 3-((*R*)-1-(*tert*-butyldimethylsilyloxy)-2-oxopropyl)-4-formyl-5,5-dimethylhexanoate (24):** To a stirred mixture of enoxy silane **25** (2.74 g, 6.23 mmol) in THF (53 mL) and H<sub>2</sub>O (7.0 mL), 4-methylmorpholine *N*-oxide (2.66 g, 12.45 mmol) and OsO<sub>4</sub> (3.35 mL, 2.5 wt% in *t*BuOH, 0.31 mmol) were added. The mixture was stirred 7 h, then solid NaHSO<sub>3</sub> (2 g) was added and the resulting mixture was stirred

for 1 h. The reaction mixture was diluted with H<sub>2</sub>O (100 mL) and extracted with EtOAc (4 × 75 mL). Combined organic extracts were washed with brine (100 mL), dried over Na<sub>2</sub>SO<sub>4</sub>, filtered, and concentrated to afford crude α-hydroxyketone as a mixture of diastereomers, which were sufficiently pure for use in the next transformation. The crude α-hydroxyketone was dissolved in

- 
5. a) Kaneko, C.; Sugimoto, A.; Tanaka, S. *Synthesis* **1974**, 876. b) Inoue, Y.; Wada, K.; Liu, Y.; Ouchi, M.; Tai, A.; Hakushi, T. *J. Org. Chem.* **1989**, *54*, 5268. c) Tietz, L. F.; Stadler, C.; Böhnke, N.; Brasche, G.; Grube, A. *Synlett* **2007**, 485.  
6. Basra, S. K.; Drew, M. G. B.; Mann, J.; Kane, P. D. *J. Chem. Soc., Perkin Trans. 1* **2000**, 3592.  
7. a) Korach, M.; Nielsen, D. R.; Rideout, W. H. *Org. Synth.* **1962**, *42*, 50. b) Crandall, J. K.; Banks, D. B.; Coyler, R. A.; Watkins, R. J.; Arrington, J. P. *J. Org. Chem.* **1968**, *33*, 423.  
8. Deardorff, D. R.; Myles, D. C.; MacFerrin, K. D. *Tetrahedron Lett.* **1985**, *26*, 5615.  
9. Theil, F.; Schick, H.; Winter, G.; Reck, G. *Tetrahedron* **1991**, *47*, 7569. b) Khan, P. M.; Wu, R.; Bisht, K. S. *Tetrahedron* **2007**, *63*, 1116.  
10. Schnermann, M. J.; Beaudry, C.; Egovora, A. V.; Polishchuk, R. S.; Sütterlin, C.; Overman, L. E. *Proc. Nat. Acad. Sci. USA* **2010**, *107*, 6158.

MeOH (30 mL) and C<sub>6</sub>H<sub>6</sub> (30 mL), cooled to 0 °C, and Pb(OAc)<sub>4</sub> (3.59 g, 8.09 mmol) was added in one portion. After 15 min saturated aqueous NaHCO<sub>3</sub> (4.0 mL) was added and the mixture was diluted with EtOAc (200 mL) resulting in a orange precipitate. The resulting suspension was passed through a pad of Na<sub>2</sub>SO<sub>4</sub>/SiO<sub>2</sub> eluting with EtOAc and concentrated to give tricarbonyl **24** (2.20 g, 95%) as a clear oil that matched the previously reported analytical data.<sup>10</sup>

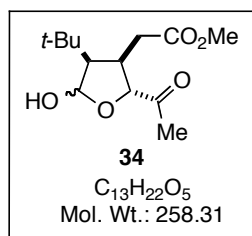

**Methyl 2-((2R,3R,4R)-4-tert-butyl-2-ethanoyl-5-hydroxytetrahydrofuran-3-yl)ethanoate (34):** To a solution of **24** (120 mg, 0.27 mmol) in THF (2.5 mL) at 0 °C was added TBAF (410 mL, 1M in THF, 0.41 mmol). The solution was stirred for 10 min. Silica gel was added until the mixture became viscous, and was stirred magnetically for

an additional 5 min. The mixture loaded onto a silica gel column. Purification by silica gel chromatography (30% hexanes: EtOAc) gave **34** (34 mg, 48%) as a 10:1 mixture of anomeric alcohols as a clear oil: R<sub>f</sub> 0.32 (2:1 hexane:EtOAc); <sup>1</sup>H NMR (CDCl<sub>3</sub>, 500 MHz, peaks for major isomer) δ 5.31 (s, 1H), 4.43 (s, 1H), 3.90 (br s, 1H), 3.71 (s, 3H), 2.83 (m, 1H), 2.75 (dd, *J* = 16.8, 3.8 Hz, 1H), 2.49 (dd, *J* = 12.2, 16.7 Hz, 1H), 2.31 (s, 3H), 1.75 (app t, *J* = 6.3 Hz, 1H), 1.00 (s, 9H); <sup>13</sup>C NMR (CDCl<sub>3</sub>, 125 MHz, peaks for major isomer) δ 210.7, 173.2, 101.3, 88.0, 58.3, 52.1, 42.0, 33.9, 30.3, 29.5, 26.1; IR (thin film) 1733, 1717 cm<sup>-1</sup>; HRMS-ESI (*m/z*): [M+Na]<sup>+</sup> calculated for C<sub>13</sub>H<sub>22</sub>O<sub>5</sub>Na 281.1365, observed: 281.1356; [α]<sub>D</sub><sup>25</sup> -9.0°; [α]<sub>577</sub><sup>25</sup> -10.3°; [α]<sub>546</sub><sup>25</sup> -14.8°; [α]<sub>435</sub><sup>25</sup> -58.8°; [α]<sub>405</sub><sup>25</sup> -95.2°, (*c* = 1.0, CHCl<sub>3</sub>).

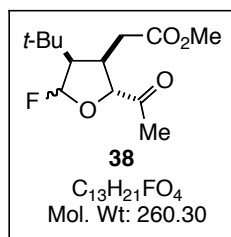

**Methyl 2-((2R,3R,4R)-4-tert-butyl-2-ethanoyl-5-fluorotetrahydrofuran-3-yl)ethanoate (38):** A solution of **34** (19 mg, 0.070 mmol) in CH<sub>2</sub>Cl<sub>2</sub> (0.7 mL) was cooled to -78 °C and DAST (17 μL, 0.11 mmol) was added. After 5 min, saturated sodium bicarbonate (1 mL) and CH<sub>2</sub>Cl<sub>2</sub> (1 mL) were added to the solution and the mixture was allowed to warm to r.t.. The

layers were separated and the aqueous layer was washed with additional CH<sub>2</sub>Cl<sub>2</sub> (2 × 1 mL) The organic phases were combined, dried over Na<sub>2</sub>SO<sub>4</sub>, filtered, and concentrated to yield as **38** (18 mg, 95%) as a clean ~2:1 mixture of anomeric fluorides by NMR. Characteristic data for **38**: <sup>1</sup>H NMR (500 MHz, CDCl<sub>3</sub>) δ 5.90 (dd, *J* = 68.2, 3.0 Hz, 1H, major), 5.87 (d, *J* = 66.0 Hz, 1H, minor), 4.65 (s, 1H, major), 4.17 (t, *J* = 6.8 Hz, 1H, minor), 3.71 (s, 3H, minor), 3.66 (s, 3H, minor), 3.10 (m, 1H), 2.90 (d, *J* = 13.2 Hz, 1H, minor), 2.78 (m, 2H, major + m, 1H, minor), 2.63 (dd, *J* = 17.1, 7.9 Hz, 1H, minor), 2.29 (s, 3H), 2.25 (s, 3H), 2.20 (m, 1H), 1.81 (ddd, *J* = 35.2,

6.7, 3.0 Hz), 1.07 (s, 9H, major), 0.95 (s, 9H, minor); HRMS–ESI ( $m/z$ ):  $[M+Na]^+$  calculated for  $C_{13}H_{21}FO_4Na$  283.1322, observed 283.1320.

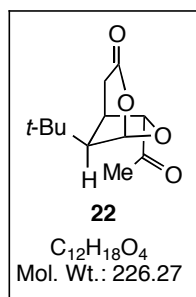

**(1S,5R,6R,8R)-8-tert-butyl-6-ethanoyl-2,7-dioxabicyclo[3.2.1]octan-3-one (22)**

**From 34:** To a solution of ester **34** (179 mg, 0.694 mmol) in MeOH (6.9 mL) at 0 °C was added 1N NaOH (1.40 mL, 1.39 mmol). The mixture was warmed to rt and stirred for 3.5 h. The reaction mixture was poured into brine (10 mL) and acidified to pH 2 with a 1M HCl solution. The aqueous layer was extracted with  $CHCl_3$  until TLC indicated complete extraction of the product (15 x 10 mL). The combined organic layers were dried over  $Na_2SO_4$ , filtered, and concentrated to give crude acid **35** as a clear oil sufficiently pure for the subsequent transformation. Crude acid **35** from above was dissolved in  $CHCl_3$  (8.7 mL) and treated with CSA (48 mg, 0.21 mmol). The solution was stirred for 12 h at rt. The mixture was diluted with  $CH_2Cl_2$  (10 mL) and poured into a saturated aqueous solution of  $NaHCO_3$  (15 mL). The layers were separated and the organic phase was washed with additional  $NaHCO_3$  (15 mL). The combined aqueous layers were extracted with  $CH_2Cl_2$  (3 x 20 mL). The organic phases were combined, dried over  $Na_2SO_4$ , filtered, and concentrated. Purification by silica gel chromatography (30–50% EtOAc/hexanes) gave **22** (85 mg, 54%, 2 steps) as a clear oil that matched previously reported analytical data.<sup>10</sup>

**From 36:** To a solution of ester **36** (105 mg, 0.330 mmol) in MeOH (1.39 mL) at rt was added 1N NaOH (1.40 mL, 1.39 mmol) and the mixture was stirred for 36 h. The resulting mixture was cooled to 0 °C and 1 N HCl (5 mL) was added and the mixture was stirred for 30 min.  $CH_2Cl_2$  (5 mL) was added and the layers were separated and the aqueous layer was extracted with  $CH_2Cl_2$  (10 x 10 mL). The combined organic layers were dried over  $Na_2SO_4$ , filtered, and concentrated to give the crude acid **37** as a clear oil that was sufficiently pure for use in the subsequent transformation. The crude acid was dissolved in dry benzene (5 mL) and concentrated for azeotropic drying. This procedure was repeated 3 times. The crude acid **37** was dissolved in  $CH_2Cl_2$  (2.6 mL), cooled to 0 °C, and boron-trifluoride etherate ( $BF_3 \cdot OEt_2$ ) (34  $\mu$ L, 0.33 mmol) was added. After 1 h, saturated aqueous  $NaHCO_3$  (4 mL) was added and the layers were separated and the aqueous phase was washed with additional  $CH_2Cl_2$  (2 x 5 mL). The organic phases were combined, dried over  $Na_2SO_4$ , filtered, and concentrated. Purification of the residue by silica gel chromatography (30–50% EtOAc/hexanes) gave **22** (49 mg, 66% from **36**) as a clear oil that matched previously reported analytical data.<sup>10</sup>

**From 38:** To a solution of ester **38** (9.0 mg, 0.035 mmol) in MeOH (0.35 mL) at rt was added 1N NaOH (53  $\mu$ L, 0.53 mmol) and the mixture was stirred for 2 h. To the resulting mixture, saturated aqueous ammonium chloride (4 mL) and CH<sub>2</sub>Cl<sub>2</sub> (5 mL) was added and the layers were separated and the aqueous layer was extracted with CH<sub>2</sub>Cl<sub>2</sub> (10  $\times$  10 mL). The combined organic layers were dried over Na<sub>2</sub>SO<sub>4</sub>, filtered, and concentrated to give the crude acid **39** as a clear oil that was sufficiently pure for use in the subsequent transformation. The crude acid was dissolved in dry benzene (5 mL) and concentrated for azeotropic drying. This procedure was repeated 3 times. The crude acid was dissolved in dry DMF (1.7 mL) and SnCl<sub>2</sub> (13 mg, 0.070 mmol) was added and the mixture was stirred. After 18 h, saturated aqueous sodium bicarbonate (4 mL) and CH<sub>2</sub>Cl<sub>2</sub> (5 mL) was added and the layers were separated and the aqueous layer was extracted with CH<sub>2</sub>Cl<sub>2</sub> (3  $\times$  5 mL). The combined organic layers were dried over Na<sub>2</sub>SO<sub>4</sub>, filtered, and concentrated. The residue was purified by silica gel chromatography (30–50% EtOAc/hexanes) gave **22** (5.8 mg, 71% from **38**) as a clear oil that matched previously reported analytical data.<sup>10</sup>

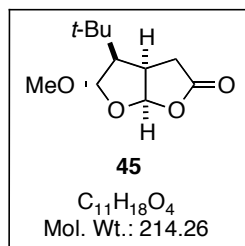

**(3aR,4R,5S,6aR)-4-tert-butyl-5-methoxytetrahydrofuro[2,3-b]furan-2(6aH)- one (45):** To a solution of ester  $\alpha$ -**36** (160 mg, 0.50 mmol) in MeOH (2.0 mL) at rt was added 1N aqueous NaOH (2.1 mL) and the mixture was stirred for 36 h. The resulting mixture was cooled to 0 °C and 1 N HCl (3 mL) was added and the mixture was stirred for 30 min.

The resulting solution was diluted with H<sub>2</sub>O (3 mL) and extracted with CH<sub>2</sub>Cl<sub>2</sub> (10  $\times$  5 mL). Combined organic extracts were dried over Na<sub>2</sub>SO<sub>4</sub>, filtered, and concentrated to afford crude acid (125 mg)  $\alpha$ -**37** as a clear oil. A solution of acid  $\alpha$ -**37** in CH<sub>2</sub>Cl<sub>2</sub> (10 mL) at 0 °C was treated with urea-H<sub>2</sub>O<sub>2</sub> complex (0.686 g, 7.26 mmol) and TFAA (0.510 mL, 3.63 mmol). The mixture was stirred for 30 min and then warmed to rt and stirred for 1 h. The mixture was cooled to 0 °C and saturated aqueous NaHCO<sub>3</sub> (10 mL) was added slowly. The biphasic mixture was separated and the aqueous layer was extracted with CH<sub>2</sub>Cl<sub>2</sub> (5  $\times$  5 mL). Combined organic extracts were dried over Na<sub>2</sub>SO<sub>4</sub>, filtered, and concentrated. Purification of the residue by silica gel chromatography (50% Et<sub>2</sub>O/hexanes) gave **45** (101 mg, 82%) as a white solid: R<sub>f</sub> 0.30 (50% Et<sub>2</sub>O/hexanes); m.p. 104–106 °C; <sup>1</sup>H NMR (500 MHz, CDCl<sub>3</sub>)  $\delta$  6.01 (d, *J* = 4.7 Hz, 1H), 5.10 (d, *J* = 7.3 Hz, 1H), 3.49 (s, 3H), 3.05 (m, 1H), 2.70 (dd, *J* = 17.8, 9.7 Hz, 1H), 2.56 (dd, *J* = 17.8, 9.5 Hz, 1H), 2.12 (t, *J* = 7.0 Hz, 1H), 1.03 (s, 9H); <sup>13</sup>C NMR (125 MHz; CDCl<sub>3</sub>)  $\delta$  176.2, 106.9, 104.9, 55.6, 42.0, 31.2, 29.83, 29.81; IR (thin film) 2959, 1793, 1371, 1169, 1120, 1037, 1017 cm<sup>-1</sup>; HRMS-ESI (*m/z*): [M+Na]<sup>+</sup> calculated for C<sub>11</sub>H<sub>18</sub>O<sub>4</sub>Na 237.1103; observed 237.1102; [ $\alpha$ ]<sub>D</sub><sup>25</sup> +151.0°, [ $\alpha$ ]<sub>577</sub><sup>25</sup> +159.7°, [ $\alpha$ ]<sub>546</sub><sup>25</sup> +180.1°, [ $\alpha$ ]<sub>435</sub><sup>25</sup> +294.5°, [ $\alpha$ ]<sub>405</sub><sup>25</sup> +331.7° (*c* = 1.00, CH<sub>2</sub>Cl<sub>2</sub>). See

table S1 for full structural assignment.

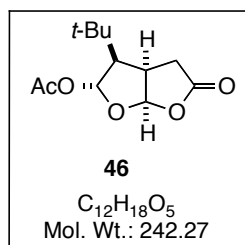

**3-tert-butyl-5-oxohexahydrofuro[2,3-*b*]furan-2-yl ethanoate (46).**

**From 45:** To a solution of **45** (5.0 mg, 0.023 mmol) in THF (0.5 mL), 1 N HCl (0.5 mL), was added. The mixture was stirred at rt for 24 h then diluted with H<sub>2</sub>O (1 mL) and washed with CH<sub>2</sub>Cl<sub>2</sub> (10 × 1 mL). Combined organic extracts were dried over Na<sub>2</sub>SO<sub>4</sub>, filtered, and concentrated. The residue was dissolved in CH<sub>2</sub>Cl<sub>2</sub> (0.5 mL) and treated with Ac<sub>2</sub>O (13 μL, 0.136 mmol), pyridine (15 μL, 0.184 mmol), and DMAP (0.5 mg, 0.004 mmol). After 18 h at rt MeOH (300 μL) was added, stirred for 30 min, and concentrated. The residue was dissolved in heptane (1 mL) and concentrated; which was repeated with heptane (2 × 1 mL). Purification of the residue by silica gel chromatography (30% EtOAc/hexanes) gave **46** (3.5 mg, 61%) as a white solid: m.p. 140-142 °C; R<sub>f</sub> 0.19 (30% ethyl acetate/ hexanes); <sup>1</sup>H NMR (CDCl<sub>3</sub>, 500 MHz) δ 6.38 (d, *J* = 7.3 Hz, 1H), 6.05 (d, *J* = 4.4, 1H), 3.10 (m, 1H), 2.71 (dd, *J* = 17.5, 10.0 Hz, 1H), 2.57 (dd, *J* = 17.5, 9.2 Hz, 1H), 2.41 (apt t, *J* = 6.8 Hz, 1H), 2.11 (s, 3H), 1.04 (s, 9H); <sup>13</sup>C NMR (CDCl<sub>3</sub>, 125 MHz) δ 175.6, 170.0, 105.2, 97.0, 55.1, 42.1, 31.5, 29.6, 29.4, 21.4; IR (film) 2917, 1795, 1017 cm<sup>-1</sup>; HRMS-ESI (*m/z*): [M+Na]<sup>+</sup> calculated for C<sub>12</sub>H<sub>18</sub>O<sub>5</sub>Na 265.1052, observed 265.1053; [α]<sub>D</sub><sup>18</sup> +79.8°; [α]<sub>577</sub><sup>18</sup> +75.1°; [α]<sub>546</sub><sup>18</sup> +86.6°; [α]<sub>435</sub><sup>18</sup> +143.6°; [α]<sub>405</sub><sup>18</sup> +160.0° (*c* = 0.20, CH<sub>2</sub>Cl<sub>2</sub>). X-ray quality crystals were obtained via vapour diffusion by dissolving **46** in CH<sub>2</sub>Cl<sub>2</sub> and exposing to hexanes vapour. See table S2 for full structural assignment.

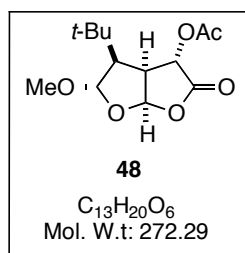

**(3*S*,3*aS*,4*R*,5*S*,6*aR*)-4-tert-butyl-5-methoxy-2-oxohexahydrofuro[2,3-*b*]furan-3-yl ethanoate (48).**

A solution of **45** (0.050 g, 0.234 mmol) in THF (2 mL) was cooled to 0 °C and a solution of 1 M NaHMDS in THF (490 μL, 0.490 mmol) was added. After 1 h, the solution was cooled to -78 °C and a solution of (+/-)-*trans*-2-(phenylsulfonyl)-3-phenyloxaziridine (0.098 g, 0.370 mmol) in THF (0.5 mL) was added dropwise. After 2 h, saturated aqueous NaHCO<sub>3</sub> (5 mL) and CH<sub>2</sub>Cl<sub>2</sub> (5 mL) were added and the layers were separated. The aqueous layer was extracted with CH<sub>2</sub>Cl<sub>2</sub> (5 × 5 mL). Combined organic extracts were dried over Na<sub>2</sub>SO<sub>4</sub>, filtered, and concentrated. Purification of the residue by silica gel chromatography (25% EtOAc/hexanes) afforded **47** (0.012 g, 22%) as a colorless resin. Characteristic data for **47**: <sup>1</sup>H NMR (500 MHz, CDCl<sub>3</sub>) δ 5.97 (d, *J* = 4.6 Hz, 1H), 5.08 (d, *J* = 7.1

Hz, 1H), 4.52 (d,  $J = 8.8$  Hz, 1H), 3.49 (s, 3H), 2.97 (dt,  $J = 8.6, 5.5$  Hz, 1H), 2.93 (s, 1H), 2.19 (t,  $J = 6.7$  Hz, 1H), 1.11 (s, 9H);  $^{13}\text{C}$  NMR (125 MHz;  $\text{CDCl}_3$ )  $\delta$  178.0, 107.5, 102.6, 67.6, 57.1, 55.7, 50.0, 31.6, 29.2. To a solution of  $\alpha$ -hydroxy lactone **47** (7.0 mg, 0.030 mmol) in  $\text{CH}_2\text{Cl}_2$  (150  $\mu\text{L}$ ) was added  $\text{Ac}_2\text{O}$  (17  $\mu\text{L}$ , 0.18 mmol), pyridine (19  $\mu\text{L}$ , 0.24 mmol), and DMAP (0.5 mg, 0.004 mmol). After 18 h at rt, MeOH (100  $\mu\text{L}$ ) was added, stirred for 30 min, and concentrated. The residue was dissolved in heptane (1 mL) and concentrated; which was repeated with heptane ( $2 \times 1$  mL) and benzene ( $2 \times 1$  mL). Purification of the residue by silica gel chromatography (50%  $\text{Et}_2\text{O}$ /hexanes) afforded **48** (6.0 mg, 76%; 17% over two steps) as a white solid:  $R_f$  0.38 (50%  $\text{Et}_2\text{O}$ /hexanes); m.p. 101–103  $^\circ\text{C}$ ;  $^1\text{H}$  NMR (500 MHz,  $\text{CDCl}_3$ )  $\delta$  6.02 (d,  $J = 4.8$  Hz, 1H), 5.50 (d,  $J = 8.8$  Hz, 1H), 5.11 (d,  $J = 7.2$  Hz, 1H), 3.49 (s, 3H), 3.26–3.22 (m, 1H), 2.20–2.16 (m, 4H), 1.03 (s, 9H);  $^{13}\text{C}$  NMR  $\delta$  (125 MHz;  $\text{CDCl}_3$ )  $\delta$  172.3, 169.5, 107.0, 102.3, 68.5, 57.2, 55.6, 46.7, 31.2, 29.3, 20.8; IR (thin film) 2961, 1805, 1756, 1372, 1223, 1180, 1121, 1070, 1039, 1026, 982, 948  $\text{cm}^{-1}$ ; HRMS-ESI ( $m/z$ ):  $[\text{M}+\text{Na}]^+$  calculated for  $\text{C}_{13}\text{H}_{20}\text{O}_6\text{Na}$  295.1158; observed 295.1148;  $[\alpha]_D^{23} +26.6^\circ$ ;  $[\alpha]_{577}^{23} +27.8^\circ$ ;  $[\alpha]_{546}^{23} +31.2^\circ$ ;  $[\alpha]_{435}^{23} +48.3^\circ$ ;  $[\alpha]_{405}^{23} +53.1^\circ$  ( $c = 0.57$ ,  $\text{CH}_2\text{Cl}_2$ ). See table S1 for full structural assignment.

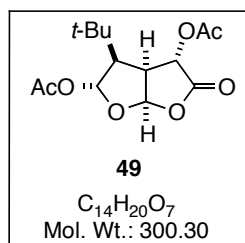

**(2R,3R,3aS,4S,6aR)-3-tert-butyl-5-oxohexahydrofuro[2,3-b]furan-2,4-diyl diethanoate (49).**

**Directly From 13.** To a solution of **13** (7.0 mg, 0.023 mmol) in THF (0.5 mL) was added 1 N HCl (0.5 mL), and the mixture was stirred at rt for 24 h. The mixture was extracted with  $\text{CH}_2\text{Cl}_2$  ( $10 \times 1$  mL). Combined organic extracts were dried over  $\text{Na}_2\text{SO}_4$ , filtered, and concentrated. The residue was dissolved in  $\text{CH}_2\text{Cl}_2$  (0.5 mL) and treated with  $\text{Ac}_2\text{O}$  (13  $\mu\text{L}$ , 0.13 mmol), pyridine (14  $\mu\text{L}$ , 0.18 mmol), and DMAP (0.5 mg, 0.004 mmol). After 18 h at rt, MeOH (200  $\mu\text{L}$ ) was added, stirred for 30 min, and concentrated. The residue was dissolved in 1:1 THF: $\text{H}_2\text{O}$  (0.9 mL) and treated with 2-methyl-2-butene (0.11 mL),  $t$ -BuOH (0.11 mL),  $\text{NaH}_2\text{PO}_4$  (31 mg, 0.26 mmol), and  $\text{NaClO}_2$  (11 mg, 0.12 mmol). The mixture was stirred for 16 h at rt, then diluted with saturated aqueous  $\text{NH}_4\text{Cl}$  (1.0 mL) and extracted with EtOAc ( $3 \times 1$  mL). The combined organic extracts were washed with brine (1.0 mL), dried over  $\text{Na}_2\text{SO}_4$ , filtered, and concentrated. Purification of the residue by silica gel chromatography (50% hexanes/EtOAc) gave **49** (2.5 mg, 36%) as a clear resin:  $R_f$  0.40 (50% EtOAc/hexanes);  $^1\text{H}$  NMR (500 MHz,  $\text{CDCl}_3$ )  $\delta$  6.39 (d,  $J = 7.1$  Hz, 1H), 6.07 (d,  $J = 4.5$  Hz, 1H), 5.47 (d,  $J = 8.8$  Hz, 1H), 3.35–3.33 (m, 1H), 2.46 (t,  $J = 6.8$  Hz, 1H), 2.20 (s, 3H), 2.11 (s, 3H), 1.04 (s, 9H);  $^{13}\text{C}$  NMR (125 MHz;  $\text{CDCl}_3$ )  $\delta$  171.7, 169.8,



169.4, 102.6, 96.9, 68.2, 54.9, 46.5, 31.4, 29.0, 21.3, 20.7; IR (thin film) 2964, 1808, 1753, 1370, 1175, 1063, 1021, 971  $\text{cm}^{-1}$ ; HRMS-ESI ( $m/z$ ):  $[\text{M}+\text{Na}]^+$  calculated for  $\text{C}_{14}\text{H}_{20}\text{O}_7\text{Na}$  323.1107, observed 323.1112;  $[\alpha]_D^{23}$   $-12.1^\circ$ ;  $[\alpha]_{577}^{23}$   $-12.7^\circ$ ,  $[\alpha]_{546}^{23}$   $-13.8^\circ$ ,  $[\alpha]_{435}^{23}$   $-36.9^\circ$ ,  $[\alpha]_{405}^{23}$   $-52.2^\circ$  ( $c = 0.5$ ,  $\text{CH}_2\text{Cl}_2$ ). See table S3 for full structural assignment.

**From 48.** To a solution of **48** (3.0 mg, 0.011 mmol) in THF (0.5 mL) was added 1 N HCl (0.5 mL), and the mixture was stirred at rt for 24 h. The mixture was extracted with  $\text{CH}_2\text{Cl}_2$  (10  $\times$  1 mL). Combined organic extracts were dried over  $\text{Na}_2\text{SO}_4$ , filtered, and concentrated. The residue was dissolved in  $\text{CH}_2\text{Cl}_2$  (0.25 mL) and treated with  $\text{Ac}_2\text{O}$  (2.0  $\mu\text{L}$ , 0.028 mmol), pyridine (25  $\mu\text{L}$ ), and DMAP (0.5 mg, 0.004 mmol). After 18 h at rt, MeOH (100  $\mu\text{L}$ ) was added, stirred for 30 min, and concentrated. The residue was dissolved in 1:1 THF:H<sub>2</sub>O (0.5 mL) and treated with 2-methyl-2-butene (0.25 mL), *t*-BuOH (0.10 mL),  $\text{NaH}_2\text{PO}_4$  (17 mg, 0.11 mmol), and  $\text{NaClO}_2$  (6 mg, 0.55 mmol). The mixture was stirred for 16 h at rt, then diluted with saturated aqueous  $\text{NH}_4\text{Cl}$  (1.0 mL) and extracted with EtOAc (3  $\times$  1 mL). The combined organic extracts were washed with brine (1.0 mL), dried over  $\text{Na}_2\text{SO}_4$ , filtered, and concentrated. Purification of the residue by silica gel chromatography (50% hexanes/EtOAc) gave **49** (1.0 mg, 24%) as a clear resin.

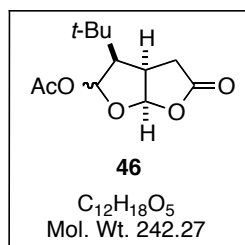

**Directly From 14:** A solution of **14** (4.0 mg, 0.016 mmol) and AcOH (1.9  $\mu\text{L}$ , 0.033 mmol) in  $\text{CH}_2\text{Cl}_2$  (200  $\mu\text{L}$ ) at 0  $^\circ\text{C}$  was treated with a 10%  $\text{BF}_3\cdot\text{OEt}_2$  solution in  $\text{CH}_2\text{Cl}_2$  (70  $\mu\text{L}$ , 0.033 mmol). After 1h, saturated aqueous  $\text{NaHCO}_3$  (3 mL),  $\text{CH}_2\text{Cl}_2$  (3 mL) was added to the solution and the layers were separated. The aqueous layer was extracted with  $\text{CH}_2\text{Cl}_2$  (3  $\times$  3 mL). The combined organic extracts were dried over  $\text{Na}_2\text{SO}_4$ , filtered, and concentrated. Purification by silica gel chromatography (25% ethyl acetate/ hexanes) afforded  **$\alpha$ -46** (0.8 mg, 20%) as a clear oil with analytical data identical to the material provided by the procedure described above and  **$\beta$ -46** (3.0 mg, 75%) as a clear oil. Data for  **$\beta$ -46**:<sup>11</sup>  $R_f$  0.17 (30% EtOAc/hexanes);  $^1\text{H}$  NMR ( $\text{C}_6\text{D}_6$ , 500 MHz)  $\delta$  6.33 (d,  $J = 4.1$  Hz, 1H), 5.44 (d,  $J = 5.5$  Hz, 1H), 2.80 (dd,  $J = 17.1, 6.4$  Hz, 1H), 1.87 (m, 2H), 1.41 (s, 3H), 1.21 (m, 1H), 0.60 (s, 9H);  $^{13}\text{C}$  NMR ( $\text{C}_6\text{D}_6$ , 125 MHz)  $\delta$  175.1, 168.6, 107.3, 97.0, 54.0, 38.1, 31.1, 30.3, 29.5, 20.7. IR (thin film) 2956, 1788, 1753, 1225, 1066, 921  $\text{cm}^{-1}$ ; HRMS-ESI ( $m/z$ ):  $[\text{M}+\text{Na}]^+$  calculated for  $\text{C}_{12}\text{H}_{18}\text{O}_5\text{Na}$

<sup>11</sup> The chromatographic separation of  **$\beta$ -46** from  **$\alpha$ -46** was challenging and a trace amount of  **$\alpha$ -46** (~5%) remained in the final sample of  **$\beta$ -46**.

265.1058, observed 265.1052;  $[\alpha]_D^{23}$   $-80.4^\circ$ ,  $[\alpha]_{577}^{23}$   $-79.5^\circ$ ,  $[\alpha]_{546}^{23}$   $-90.3^\circ$ ,  $[\alpha]_{435}^{23}$   $-145.4^\circ$ ,  $[\alpha]_{405}^{23}$   $-165.1^\circ$  ( $c = 0.2$ ,  $\text{CH}_2\text{Cl}_2$ ). See table S4 for full structural assignment.

**From 14 through lactol 50:**

To a solution of **14** (30.0 mg, 0.124 mmol) in THF (4.0 mL), 1 N HCl (2.0 mL), was added. The mixture was stirred at 40 °C for 24 h then diluted with H<sub>2</sub>O (2 mL) and washed with CH<sub>2</sub>Cl<sub>2</sub> (10 × 2 mL). Combined organic extracts were dried over Na<sub>2</sub>SO<sub>4</sub>, filtered, and concentrated. The residue was dissolved in CH<sub>2</sub>Cl<sub>2</sub> (1.2 mL) and treated with Ac<sub>2</sub>O (13 μL, 0.14 mmol), pyridine (11 μL, 0.14 mmol), and DMAP (0.5 mg, 0.004 mmol). After 18 h at rt MeOH (300 μL) was added, stirred for 30 min, and concentrated. The residue was dissolved in heptane (1 mL) and concentrated; which was repeated with heptane (2 × 1 mL) and benzene (2 × 1 mL). Purification of the residue by silica gel chromatography (30% hexanes/EtOAc) gave **46** (20 mg, 67%) as a white solid with analytical data identical to the material provided by the procedure described above.

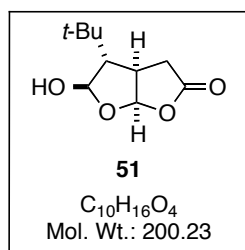

**(3aR,4S,5R,6aR)-4-tert-butyl-5-hydroxytetrahydrofuro[2,3-b]furan-2(6aH)-one (51).** To a solution of **14** (7.0 mg, 0.029 mmol) in THF (0.60 mL), 1N aqueous NaOH (0.30 mL) was added. The mixture was stirred for 30 min at rt, then diluted with H<sub>2</sub>O (1 mL) and washed with CH<sub>2</sub>Cl<sub>2</sub> (2 × 2 mL). The aqueous layer was acidified to pH 1 with 1N aqueous HCl and extracted with CH<sub>2</sub>Cl<sub>2</sub> (5 × 2 mL). Combined organic extracts were

dried over Na<sub>2</sub>SO<sub>4</sub>, filtered, and concentrated to afford **51** as a white solid (6.0 mg, 99%): m.p. 108–109 °C; R<sub>f</sub> 0.40 (50% EtOAc/hexanes); <sup>1</sup>H NMR (500 MHz, CDCl<sub>3</sub>) δ 6.07 (d,  $J = 6.0$  Hz, 1H), 5.58 (s, 1H), 2.97 (m, 1H), 2.91 (dd,  $J = 18.2, 11.0$  Hz, 1H), 2.70 (dd,  $J = 18.2, 3.6$  Hz, 1H), 1.98 (d,  $J = 1.7$  Hz, 1H), 0.95 (s, 9H); <sup>13</sup>C NMR (125 MHz; CDCl<sub>3</sub>) δ 175.6, 109.3, 102.7, 64.5, 39.6, 36.7, 31.4, 27.4; IR (thin film) 3445, 2961, 1791, 1164, 1372, 1073, 1030, 972, 920, 895 cm<sup>-1</sup>; HRMS-ESI ( $m/z$ ):  $[\text{M}+\text{Na}]^+$  calculated for C<sub>10</sub>H<sub>16</sub>O<sub>4</sub>Na 223.0946; observed 223.0946;  $[\alpha]_D^{25}$   $-24.5^\circ$ ;  $[\alpha]_{577}^{25}$   $-28.2^\circ$ ,  $[\alpha]_{546}^{25}$   $-34.2^\circ$ ,  $[\alpha]_{435}^{25}$   $-64.2^\circ$ ,  $[\alpha]_{405}^{25}$   $-77.3^\circ$  ( $c = 0.43$ ,  $\text{CH}_2\text{Cl}_2$ ). See table S5 for full structural assignment.

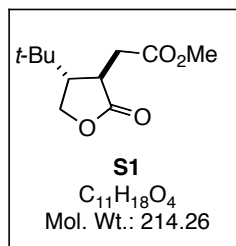

**Methyl 2-((3R,4S)-4-tert-butyl-2-oxotetrahydrofuran-3-yl)ethanoate (S1).** To a solution of **14** (10.0 mg, 0.047 mmol) in THF (1.0 mL), 1N aqueous NaOH (1.0 mL) was added. The mixture was stirred for 72 h at rt, acidified to pH 1 with 1N aqueous HCl and extracted with CH<sub>2</sub>Cl<sub>2</sub> (5 × 2

mL). Combined organic extracts were dried over Na<sub>2</sub>SO<sub>4</sub>, filtered, and concentrated to afford carboxylic acid **ii** as a clear oil (5.0 mg, 54%). Characteristic data for crude acid: <sup>1</sup>H NMR (500 MHz, CDCl<sub>3</sub>) δ 4.38 (t, *J* = 9.1 Hz, 1H), 4.11 (dd, *J* = 9.4, 7.1 Hz, 1H), 2.98 (dd, *J* = 16.9, 4.4 Hz, 1H), 2.75 (m, 2H), 2.29 (q, *J* = 8.3, 1H), 0.95 (s, 9H). The crude acid was dissolved in MeOH (1.0 mL) at room temperature and treated with a 1.0 M solution of TMSCHN<sub>2</sub> in hexanes (0.20 mL, 0.20 mmol) and stirred for 30 min. A 30% solution of AcOH in MeOH was added drop wise until effervescence ceased (~ 1 mL). Saturated aqueous NaHCO<sub>3</sub> (2 mL) and CH<sub>2</sub>Cl<sub>2</sub> (2 mL) were added to the solution and the layers were separated. The aqueous layer was extracted with CH<sub>2</sub>Cl<sub>2</sub> (3 × 1 mL) and the combined organic extracts were dried over Na<sub>2</sub>SO<sub>4</sub>, filtered, and concentrated. Purification by silica gel chromatography (25% ethyl acetate/ hexanes) afforded **S1** (4.5 mg, 45% for two steps) as a clear oil:<sup>12</sup> R<sub>f</sub> 0.19 (20% EtOAc/hexanes); <sup>1</sup>H NMR (500 MHz, CDCl<sub>3</sub>) δ 4.38 (t, *J* = 9.1 Hz, 1H), 4.11 (dd, *J* = 9.4, 7.1 Hz, 1H), 3.73 (s, 3H), 2.90 (dd, *J* = 18.3, 6.5 Hz, 1H), 2.75–2.71 (m, 2H), 2.25 (dt, *J* = 8.6, 7.4 Hz, 1H), 0.94 (s, 9H); <sup>13</sup>C NMR (125 MHz; CDCl<sub>3</sub>) δ 179.1, 171.8, 68.5, 52.3, 49.9, 38.1, 35.7, 32.3, 27.1; IR (thin film) 2957, 2875, 1772, 1737, 1370, 1177 cm<sup>-1</sup>; HRMS-ESI (*m/z*): [M+Na]<sup>+</sup> calculated for C<sub>11</sub>H<sub>19</sub>O<sub>4</sub> 215.1283; observed 215.1280; [α]<sub>D</sub><sup>25</sup> +8.6°; [α]<sub>577</sub><sup>25</sup> +10.0°, [α]<sub>546</sub><sup>25</sup> +14.2°, [α]<sub>435</sub><sup>25</sup> +28.6°, [α]<sub>405</sub><sup>25</sup> +38.5° (*c* = 0.2, CH<sub>2</sub>Cl<sub>2</sub>).

#### General procedure for preparation of MTPA-lactol esters.<sup>13</sup>

To a stirred solution of lactol **50** or **51** (1.0 equiv.), pyridine (3.1 equiv.), and DMAP (1.0 equiv.) in CH<sub>2</sub>Cl<sub>2</sub> (0.1 M) at room temperature, *R*-(–)- or *S*-(+)-MTPA-Cl (2.0 equiv.) was added and stirred at room temperature for 18 h. MeOH (0.10 mL) was added, stirred for 30 min, and the mixture was concentrated. The residue was dissolved in heptane (1 mL) and concentrated; which was repeated with heptane (2 × 1 mL) and benzene (2 × 1 mL). Purification of the residue by silica gel chromatography (25% EtOAc/hexanes) gave the desired MTPA-lactol ester for <sup>1</sup>H NMR analysis.

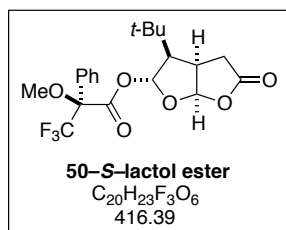

#### Data for *S*- and *R*-MTPA lactol-esters from lactol **50**.

From **50** and *R*-(–)- MTPA-Cl. Data for **50-S-lactol ester**: <sup>1</sup>H NMR (600 MHz, CDCl<sub>3</sub>) 7.55-7.53 (m, 2H), 7.44-7.42 (m, 3H), 6.51 (d, *J* = 6.3 Hz, 1H), 5.94 (d, *J* = 4.2 Hz, 1H), 3.55 (s, 3H), 3.11-3.06 (m, 1H), 2.73 (dd, *J* = 17.5, 10.2 Hz, 1H), 2.57 (dd, *J* = 17.5, 9.0 Hz, 1H), 2.51

12. A small amount of an inseparable impurity was obtained along with **S1**.

13. Hoyer, T. R.; Jeffrey, C. S.; Shao, F.; *Nature Protocols* **2007**, 2, 2451

(t,  $J = 6.6$  Hz, 1H), 1.04 (s, 9H).

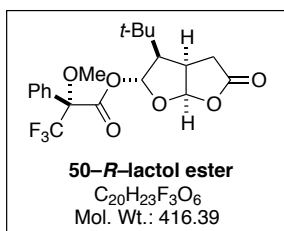

From **50** and *S*-(+)-MTPA-Cl. Data for **50-R-lactol ester**:  $^1H$  NMR (500 MHz,  $CDCl_3$ )  $\delta$  7.55-7.53 (m, 2H), 7.42 (dd,  $J = 5.2, 1.9$  Hz, 3H), 6.54 (d,  $J = 6.6$  Hz, 1H), 6.07 (d,  $J = 4.2$  Hz, 1H), 3.59 (s, 3H), 3.13-3.07 (m, 1H), 2.73 (dd,  $J = 17.6, 10.1$  Hz, 1H), 2.58 (dd,  $J = 17.6, 9.1$  Hz, 1H), 2.43 (t,  $J = 6.7$  Hz, 1H), 0.92 (s, 9H).

**Data for *S*- and *R*-MTPA lactol-esters **52S** and **52R** from lactol **51**.**

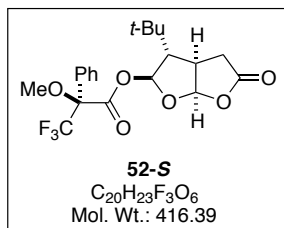

From **51** and *R*-(-)-MTPA-Cl. Data for **52-S**:  $^1H$  NMR (500 MHz,  $CDCl_3$ )  $\delta$  7.53-7.51 (m, 2H), 7.44-7.42 (m, 3H), 6.54 (d,  $J = 1.1$  Hz, 1H), 6.10 (d,  $J = 6.0$  Hz, 1H), 3.59 (s, 3H), 3.00-2.96 (m, 1H), 2.79 (dd,  $J = 18.5, 10.7$  Hz, 1H), 2.29 (dd,  $J = 18.5, 3.9$  Hz, 1H), 1.87 (d,  $J = 2.1$  Hz, 1H), 0.94 (s, 9H).

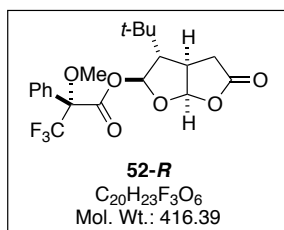

From **51** and *S*-(+)-MTPA-Cl. Data for **52-R**:  $^1H$  NMR (500 MHz,  $CDCl_3$ )  $\delta$  7.52-7.51 (m, 2H), 7.45-7.43 (m, 3H), 6.54 (s, 1H), 6.09 (d,  $J = 6.1$  Hz, 1H), 3.47 (s, 3H), 3.06-3.01 (m, 1H), 2.85 (dd,  $J = 18.5, 10.8$  Hz, 1H), 2.50 (dd,  $J = 18.5, 4.3$  Hz, 1H), 2.08-2.07 (m, 1H), 1.00 (s, 9H).

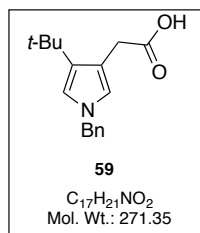

**2-(1-benzyl-4-*tert*-butyl-pyrrol-3-yl)ethanoic acid (**59**):** To a solution of **46** (5.0 mg, 0.021 mmol) in  $H_2O$  (0.72 mL) and DMSO (80  $\mu$ L),  $BnNH_2$  (9.0  $\mu$ L, 0.084 mmol) was added. The solution was stirred at rt for 18 h. To the resulting solution, saturated aqueous  $NH_4Cl$  (2 mL) and  $CH_2Cl_2$  (2 mL) were added and the layers were separated. The aqueous layer was extracted with

$CH_2Cl_2$  (3  $\times$  2 mL). The combined organic extracts were dried ( $Na_2SO_4$ ), filtered, and concentrated. Purification of the residue by silica gel chromatography (50–100% hexanes/ $EtOAc$ ) gave **59** (5.2 mg, 93%) as a clear oil which matched the previously reported analytical data.<sup>10</sup>

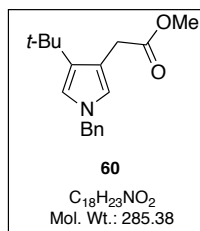

**Methyl 2-(1-benzyl-4-*tert*-butyl-1*H*-pyrrol-3-yl)acetate (**60**).** Benzylamine (2.7  $\mu$ L, 0.026 mmol) was added to a solution of **46** (3.0 mg, 0.013 mmol) in  $MeOH$  (0.25 mL). After 2 h at rt, the solution was concentrated and the residue was purified by silica gel chromatography (20%  $EtOAc$ /hexanes) to afford **60** (3.0 mg, 85%) as a clear resin, and **59** (0.4 mg, 10%). Data for **60**:

R<sub>f</sub> 0.48 (50% Et<sub>2</sub>O/hexanes); <sup>1</sup>H NMR (500 MHz, CDCl<sub>3</sub>) δ 7.35–7.32 (m, 2H), 7.29 (m, 1H), 7.14–7.13 (m, 2H), 6.59 (d, *J* = 2.5 Hz, 1H), 6.40 (d, *J* = 2.5 Hz, 1H), 4.95 (s, 2H), 3.70 (s, 3H), 3.63 (s, 2H), 1.26 (s, 9H); <sup>13</sup>C NMR (125 MHz; CDCl<sub>3</sub>) δ 173.5, 138.4, 132.5, 128.9, 127.8, 127.4, 122.1, 117.7, 113.4, 53.5, 52.1, 33.1, 31.44, 31.40; IR (thin film) 2952, 2905, 1738, 1528, 1454, 1360, 1246, 1201, 1151, 1014 cm<sup>-1</sup>; HRMS-ESI (*m/z*): [M+Na]<sup>+</sup> calculated for C<sub>18</sub>H<sub>23</sub>O<sub>2</sub>Na 308.1627, observed 308.1629. See table S6 for full structural assignment.

## ***In situ* Observation of Pyrrole formation with **13** and **14**.**

### ***In situ* observation of (**57**)**

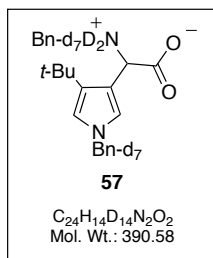

d<sub>7</sub>-Benzylamine (5.0 μL, 0.042 mmol) was added to a solution of **13** (2.5 mg, 0.008 mmol) in d<sub>4</sub>-methanol (500 μL, 0.02 M). This solution was placed in a NMR tube and allowed to stand at 25 °C for 18 h. The starting material was consumed after 24 h and the resultant pyrrole **57** was characterized *in situ*. Key spectral data for **57**: <sup>1</sup>H NMR (500 MHz, CD<sub>3</sub>OD) δ 6.94 (d, *J* = 2.4 Hz, 1H), 6.47 (d, *J* = 2.5 Hz, 1H), 4.63 (s, 1H), 1.14 (s, 9H); <sup>13</sup>C NMR (125 MHz, CD<sub>3</sub>OD) δ 174.6, 139.5, 134.0, 133.3, 122.6, 118.6, 117.4, 59.6, 32.5, 28.5; HRMS-ESI (*m/z*): [M – H]<sup>–</sup> calculated for C<sub>24</sub>H<sub>14</sub>D<sub>14</sub>N<sub>2</sub>O<sub>2</sub> 389.2951, found 389.3957. Key spectral data for CD<sub>3</sub>OAc: <sup>1</sup>H NMR (500 MHz, CD<sub>3</sub>OD) δ 2.05 (s, 3H); <sup>13</sup>C NMR (125 MHz, CD<sub>3</sub>OD) δ 173.6, 20.7. Key spectral data for AcOH: <sup>1</sup>H NMR (500 MHz, CD<sub>3</sub>OD) δ 1.90 (s, 3H); <sup>13</sup>C NMR (125 MHz, CD<sub>3</sub>OD) δ 180.45, 24.4, which matched precisely with authentic samples. See table S7 for full structural assignment.

### ***In situ* observation of (**58**)**

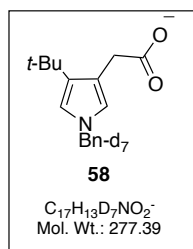

d<sub>7</sub>-Benzylamine (6.0 μL, 0.050 mmol) was added to solution of **14** (2.5 mg, 0.010 mmol) in d<sub>4</sub>-methanol (500 μL, 0.02 M). This solution was placed in a NMR tube and allowed to stand at 25 °C for 18 h. The resultant pyrrole **58** was characterized *in situ*. The reaction was quenched with a saturated aqueous solution of NH<sub>4</sub>Cl (1 mL) and extracted with CH<sub>2</sub>Cl<sub>2</sub> (3 x 1 mL). The combined organic layers were dried over Na<sub>2</sub>SO<sub>4</sub>, filtered, and concentrated and purified by silica gel chromatography (50% EtOAc/hexane) to give a clear oil (1.7 mg, 61%). Key spectral data for **58**: R<sub>f</sub> 0.18 (20% EtOAc/ hexanes), <sup>1</sup>H NMR (500 MHz, CD<sub>3</sub>OD) δ 6.54 (d, *J* = 2.5 Hz, 1H), 6.36 (d, *J* = 2.5 Hz, 1H), 3.43 (s, 2H), 1.24 (s, 9H); <sup>13</sup>C NMR (125 MHz, CD<sub>3</sub>OD) δ 182.0, 141.1, 133.3, 122.7, 118.2, 117.9, 38.5, 32.4, 31.8; IR (thin film) 2959, 1712, 1633, 1200 cm<sup>–1</sup>; HRMS-ESI (*m/z*): [M + H]<sup>+</sup> calculated for C<sub>17</sub>H<sub>14</sub>D<sub>7</sub>NO<sub>2</sub>, 279.2090, found 279.2091. Key spectral data for CD<sub>3</sub>OAc: <sup>1</sup>H NMR (500 MHz, CD<sub>3</sub>OD) δ 2.05 (s, 3H); <sup>13</sup>C NMR (125 MHz, CD<sub>3</sub>OD) δ 173.6, 20.7, which matched precisely with authentic samples. See table S8 for full structural assignment.

## **Lysozyme Modification.**

### **General Procedures and Materials**

Water (ddH<sub>2</sub>O) used in biological procedures or as a reaction solvent was deionized using an Ultrapure Milli-Q™ purification system (Millipore, USA). Lysozyme (L-7001) from chicken egg white was purchased from Sigma and used without further purification. Trypsin Gold, Mass spec grade (V5280) was purchased from Promega and used without further purification.

### **Instrumentation and Sample Analysis Preparations**

#### **Mass Spectrometry**

Mass spectra were obtained at the UCI Mass Spectrometry Facility. Electrospray LC/MS analysis was performed using a Micromass LCT time-of-flight (TOF) mass spectrometer (Waters) equipped for electrospray ionization (ESI) and connected with an Agilent 1100 series LC pump. Protein chromatography was performed using a Phenomenex Jupiter® 5 $\mu$  C5 300Å reverse phase column (2.0 x 150 mm) with a gradient mobile phase MeCN:ddH<sub>2</sub>O (2:98→ 98:2, 30 min) containing 0.01% TFA (200  $\mu$ L/min). Protein mass reconstruction was performed on the charge ladder with advanced maximum entropy (MaxEnt) software (MassLynx version 4.0 SP4, Waters). Matrix assisted laser desorption-ionization time-of-flight mass spectrometry (MALDI-TOF MS) was performed on an Applied Biosystems AB SCIEX TOF/TOF 5800. All samples were co-crystallized using an  $\alpha$ -cyano-4-hydroxycinnamic acid (CHCA) solution (10 mg/mL in 7:3 MeCN:ddH<sub>2</sub>O with 0.1% TFA). MS/MS analyses were performed on a MALDI TOF-TOF system (AB SCIEX TOF/TOF 5800).

**General procedure for protein modification.** In a 1.5 mL Eppendorf tube was combined 75.0  $\mu$ L of protein solution (400  $\mu$ M in 200 mM phosphate buffer, pH 7.0), 220.5  $\mu$ L of ddH<sub>2</sub>O, and 4.5  $\mu$ L of a 0.033M solution of the compound in DMSO. The solution was incubated at 22 °C for 20 h. The mixture was transferred to a mass spectrometry sample vial and analyzed by LCMS.

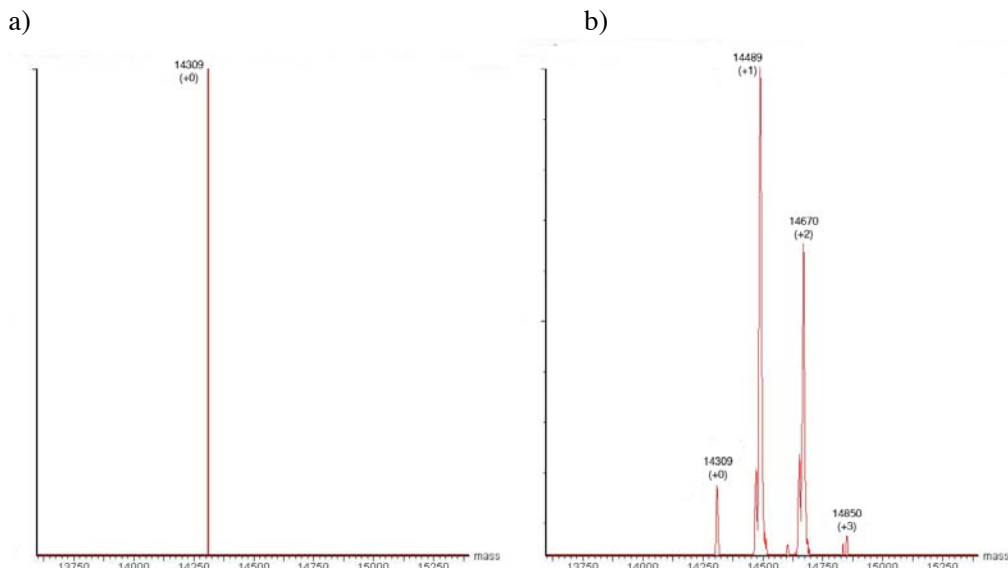

**Figure S1** Lysine modification of lysozyme with *t*-BuMacE (**13**) a) A control experiment lacking *t*-BuMacE (**13**) b) A distribution of pyrrole modified products. Spectra shown are reconstructed from charge ladders obtained using ESI-MS analysis.

**General procedure for trypsin digestion and peptide sequencing.** Pyrrole-modified lysozyme prepared as described above was dialyzed using a Pierce slide-a-lyzer (3500 MWCO, Thermo Scientific, #PI69550) MINI dialysis unit and then lyophilized. The protein was reconstituted in 50 mM  $\text{NH}_4\text{CO}_3$  buffer solution and treated with 3.0 mg DL-dithiothreitol and heated to 50 °C for 2 h. The solution was cooled to rt and 6.5 mg of iodoacetamide was added and maintained at rt in the dark for 1 h. 3.0 mg of DL-dithiothreitol was then added and heated to 50 °C for 1 h. The solution was dialyzed using a Pierce slide-a-lyzer (3500 MWCO) followed by lyophilization. The denatured and modified lysozyme was reconstituted in 50 mM  $\text{NH}_4\text{CO}_3$  and treated with trypsin (Promega, 20:1 lysozyme/trypsin) and incubated for 6 h at 37 °C. The peptide solution was concentrated and purified using a ZipTip<sup>®</sup><sub>C18</sub> (Millipore, USA). The peptides were eluted in 3.0  $\mu\text{L}$  of MeCN:ddH<sub>2</sub>O 70:30 containing 0.1% TFA and 10 mg/mL  $\alpha$ -cyano-4-hydroxycinnamic acid (CHCA) directly onto the MALDI target.



a)

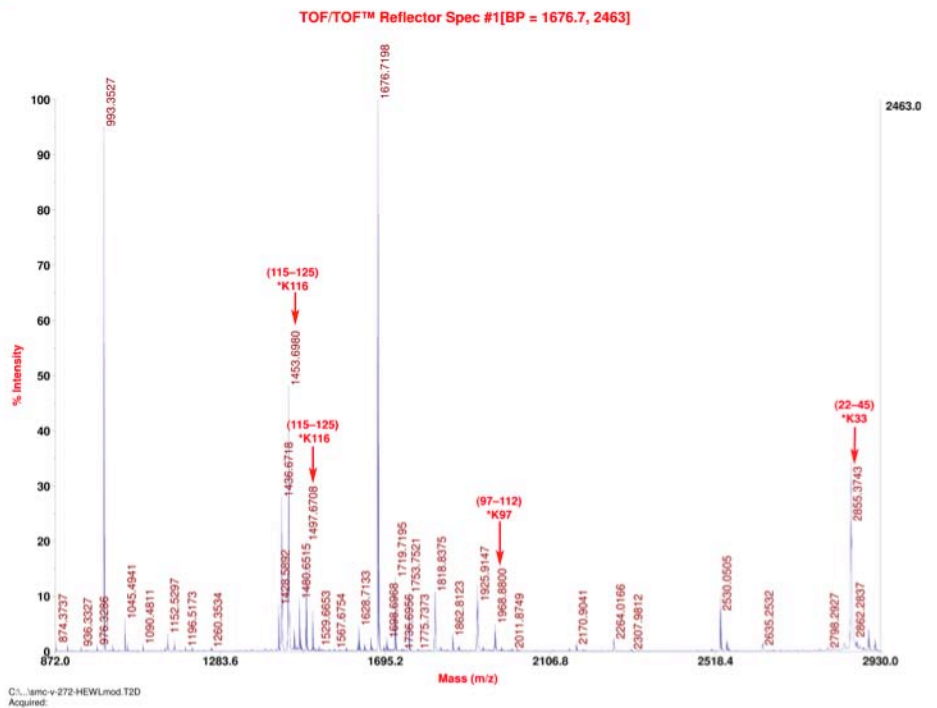

b)

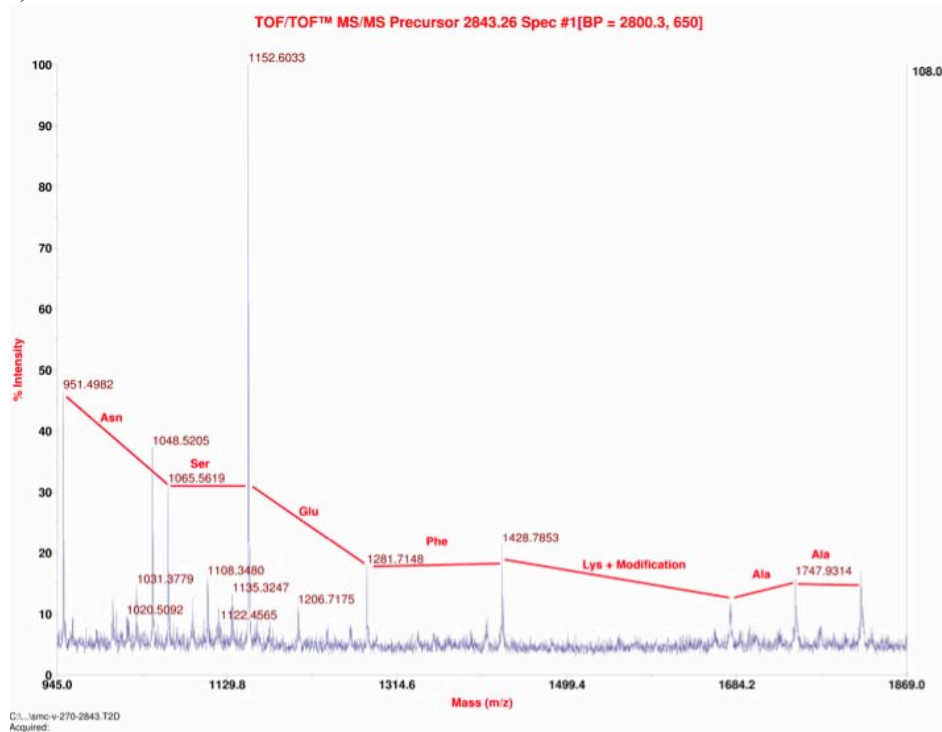

**Figure S2: 14** Modification of Lysozyme a) MALDI mass-spectrum of trypsin digest of lysozyme modified with **14** (pH 8, 10  $\mu$ M HEWL, 50  $\mu$ M **14**, 22  $^{\circ}$ C, 20 h). Labeled peaks show modification at positions K33, K97, and K116. b) MALDI TOF/TOF mass spectrum of lysozyme peptide 22–45 with modification of *t*-BuAply (+120; **14**-CO<sub>2</sub>) at K33; *m/z* 2843.

a)

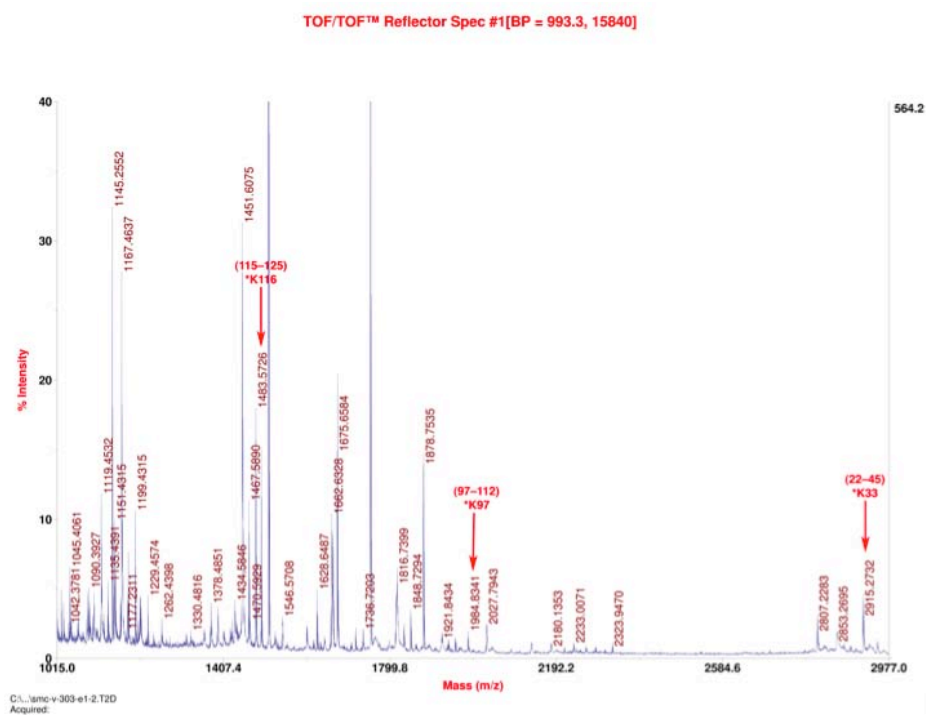

b)

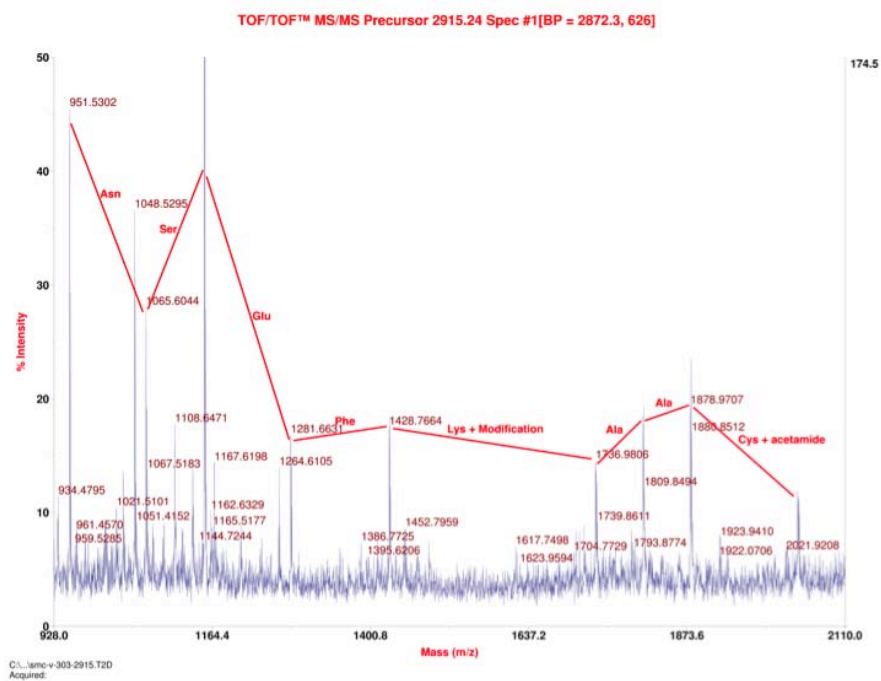

**Figure S3** *t*-BuMacE (**13**) modification of Lysozyme a) MALDI mass-spectrum of trypsin digest of lysozyme modified with *t*-BuMacE (**13**) (pH 8, 10  $\mu$ M HEWL, 50  $\mu$ M **13**, 22  $^{\circ}$ C, 20 h). Labeled peaks show modification at positions K33, K97, and K116. b) MALDI TOF/TOF mass spectrum of lysozyme peptide 22–45 with modification of *t*-BuMacE (**13**) (+180) at K33;  $m/z$  2915.

## **Hydrolysis Studies.**

### **General procedure for hydrolytic rate experiments (Shown with 13):**

A NMR tube containing 50  $\mu\text{L}$  of a solution of **13** (0.5 mg, 0.002 mmol) in  $d_6$ -DMSO and a 50 mM sodium phosphate buffer solution of pD 8.3 in  $\text{D}_2\text{O}$  (450  $\mu\text{L}$ ) was added. The sample was stored in an incubator at 37  $^\circ\text{C}$  and a  $^1\text{H}$  NMR was taken of the sample at regular intervals. The percent consumption was measured via the ratio of the peak at 6.38 ppm to the DMSO peak at 2.71 ppm. The sample was run in duplicate.

## Golgi Modification Procedure.

**Cell Culture:** Normal Rat Kidney (NRK) cells were grown in Advanced DMEM (Invitrogen), supplemented with 2% FBS and 2 mM glutamax-I (GIBCO) in a 5% CO<sub>2</sub> incubator.

**Antibodies and Reagents:** Antibodies to giantin and Mannosidase II were kindly provided by Vivek Malhotra (CRG Barcelona, Spain) and Kelley Moreman (University of Georgia) respectively. Fluorochrome-conjugated secondary antibodies were from Invitrogen.

**Compound Treatment:** NRK cells on coverslips were treated with various compounds at the indicated concentration in complete medium supplemented with 25 mM HEPES pH 7.4 at 37 °C for the indicated periods of time. Parallel control incubations were done with DMSO.

**Immunofluorescence:** NRK cells grown on coverslips were fixed for 10 min in 4% formaldehyde in PBS and incubated in blocking buffer (2.5% FBS, 0.1% Triton-X 100). Primary and secondary antibodies were diluted into blocking buffer. Cells were imaged with a Zeiss Axiovert 200M microscope and analyzed with linear adjustments with the Zeiss Axiovision software.

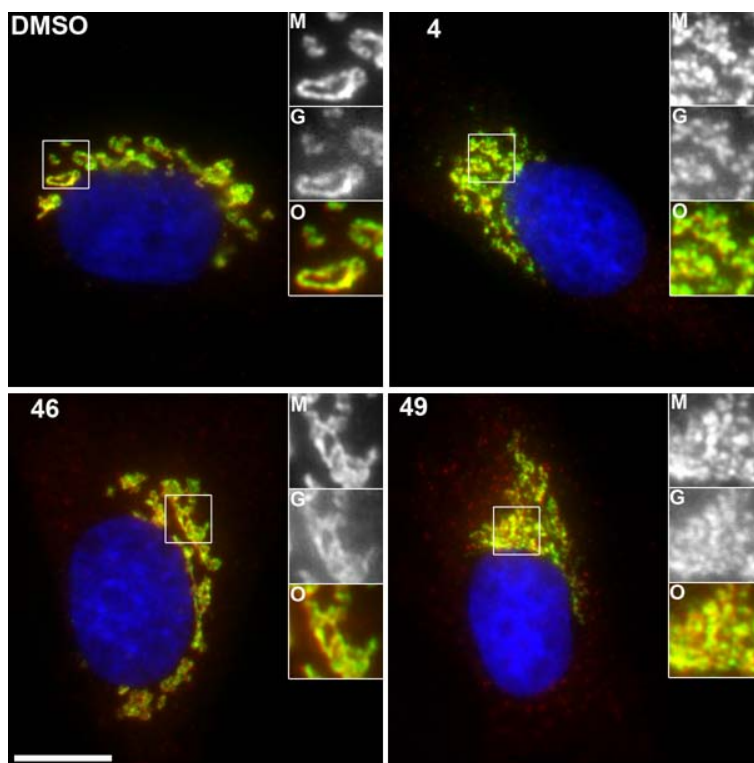

**Figure S4:** 4 and 49 produced similar phenotypes of fragmented, pericentriolar Golgi membranes in NRK cells. Normal Rat Kidney (NRK) cells were treated for one hour at 37 °C with either control (DMSO), Macfarlandin E (**4**), **46**, or **49**. Cells were fixed and stained with antibodies for the Golgi resident proteins Mannosidase II (green) and Giantin (red) and with the DNA dye Hoechst 33342. Area demarcated by the white square is enlarged in the insets to show details of Golgi reorganization induced by treatment with each of these compounds. M: Mannosidase II, G: Giantin, O: Overlay. Scale bar is 10 microns.

**X-Ray Structure of 46.**

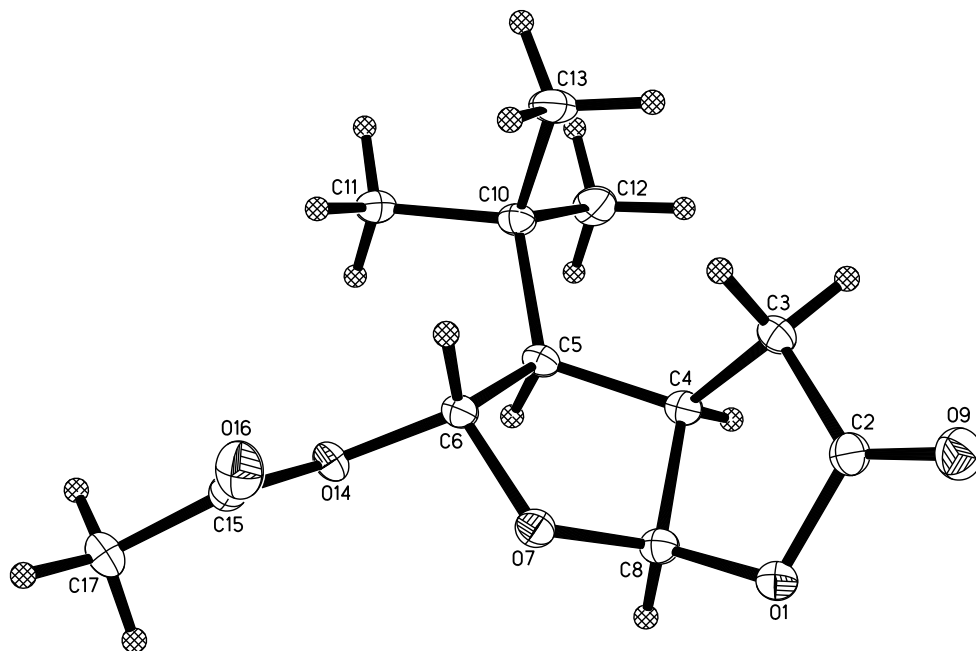



### NMR Tables for selected compounds.

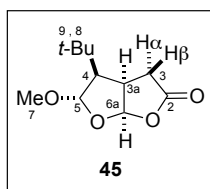

Table S1. <sup>1</sup>H (500 MHz), <sup>13</sup>C (125 MHz), HMBC, COSY, and NOESY NMR data for **45**, CDCl<sub>3</sub>

| atom | <sup>13</sup> C (mult)   | <sup>1</sup> H mult, <i>J</i> (Hz)                             | HMBC <sup>a</sup> | COSY <sup>b</sup>  | NOESY <sup>b</sup>         |
|------|--------------------------|----------------------------------------------------------------|-------------------|--------------------|----------------------------|
| 2    | 176.2 (C)                |                                                                |                   |                    |                            |
| 3    | 29.81 (CH <sub>2</sub> ) | 3-α; 2.70 (dd, 9.7, 17.8, 1H)<br>3-β; 2.56 (dd, 9.5, 17.8, 1H) | 2, 3a, 4, 6a      | 3-β, 3a<br>3-α, 3a | 3-β, 3a, 9<br>3-α, 3a, 9   |
| 3a   | 42.0 (CH)                | 3.05 (m, 1H)                                                   | 2, 3, 4, 5, 6a    | 3-α, 3-β, 4, 6a    | 3-α, 3-β, 4, 9             |
| 4    | 55.6 (CH)                | 2.12 (t, 7.0, 1H)                                              | 3a, 5, 8, 9       | 3a, 5              | 3a, 5, 9                   |
| 5    | 106.9 (CH)               | 5.10 (d, 7.3, 1H)                                              | 4, 6a, 7, 8       | 4                  | 3-β <sup>c</sup> , 4, 7, 9 |
| 6a   | 104.9 (CH)               | 6.01 (d, 4.7, 1H)                                              | 2, 3, 3a, 5       | 3a                 | 3a                         |
| 7    | 57.2 (CH <sub>3</sub> )  | 3.49 (s, 3H)                                                   | 5                 |                    |                            |
| 8    | 31.2 (C)                 |                                                                |                   |                    |                            |
| 9    | 29.83 (CH <sub>3</sub> ) | 1.03, (s, 9H)                                                  | 4                 |                    | 3-α, 3-β, 3a, 4, 5         |

<sup>a</sup>Carbons that correlate to the proton resonance. Optimized for 10 Hz coupling. <sup>b</sup>Protons that correlate to the proton resonance. <sup>c</sup>1-D NOE observed by irradiation with 2 second delay.

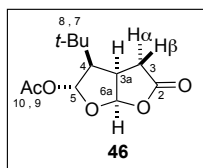

Table S2. <sup>1</sup>H (500 MHz), <sup>13</sup>C (125 MHz), HMBC, COSY, and NOESY NMR data for **46**, CDCl<sub>3</sub>

| atom | <sup>13</sup> C (mult)  | <sup>1</sup> H mult, <i>J</i> (Hz)                              | HMBC <sup>a</sup>          | COSY <sup>b</sup>  | NOESY <sup>b</sup>               |
|------|-------------------------|-----------------------------------------------------------------|----------------------------|--------------------|----------------------------------|
| 2    | 175.6 (C)               |                                                                 |                            |                    |                                  |
| 3    | 29.4 (CH)               | 3-α; 2.57 (dd, 9.2, 17.5, 1H)<br>3-β; 2.71 (dd, 10.0, 17.5, 1H) | 2, 3a, 4, 6<br>2, 3a, 4, 6 | 3a, 3-β<br>3a, 3-α | 3a, 3-β, 6a, 8<br>3a, 3-α, 6a, 8 |
| 3a   | 42.1 (CH)               | 3.10 (m, 1H)                                                    | 3, 4, 5                    | 3-α, 3-β, 4, 6a    | 3-α, 3-β, 4, 6a, 8               |
| 4    | 55.1 (CH)               | 2.41 (apt t, 6.8, 1H)                                           | 3, 3a, 5, 7, 8             | 3a, 5              | 3a, 3-β, 5, 8                    |
| 5    | 97.0 (CH)               | 6.38 (d, 7.3, 1H)                                               | 4, 6a, 7, 9                | 4                  | 4, 8                             |
| 6a   | 105.2 (CH)              | 6.05 (d, 4.4, 1H)                                               | 2, 3a, 4, 5                | 3a                 | 3a, 3-α, 3-β, 8                  |
| 7    | 31.5 (C)                |                                                                 |                            |                    |                                  |
| 8    | 29.6 (CH <sub>3</sub> ) | 1.04 (s, 9H)                                                    | 4, 7                       |                    | 3a, 3-α, 3-β, 4, 5, 6a           |
| 9    | 170.0 (C)               |                                                                 |                            |                    |                                  |
| 10   | 21.4 (CH <sub>3</sub> ) | 2.11 (s, 3H)                                                    | 9                          |                    |                                  |

<sup>a</sup>Carbons that correlate to the proton resonance; optimized 10 Hz coupling. <sup>b</sup>Protons that correlate to the proton resonance.

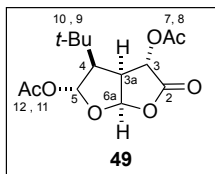

Table S3.  $^1\text{H}$  (500 MHz),  $^{13}\text{C}$  (125 MHz), HMBC, COSY, and NOESY NMR data for **49**,  $\text{CDCl}_3$

| atom | $^{13}\text{C}$ (mult) | $^1\text{H}$ mult, $J$ (Hz) | HMBC <sup>a</sup> | COSY <sup>b</sup> | NOESY <sup>b</sup> |
|------|------------------------|-----------------------------|-------------------|-------------------|--------------------|
| 2    | 171.7 (C)              |                             |                   |                   |                    |
| 3    | 68.2 (CH)              | 5.47 (d, 8.8, 1H)           |                   | 3a                | 3a, 5, 10          |
| 3a   | 46.5 (CH)              | 3.34 (m, 1H)                | 3, 5              | 3, 4, 6a          | 3, 4, 6a, 10       |
| 4    | 54.9 (CH)              | 2.46 (t, 6.8, 1H)           | 3, 3a, 5, 9, 10   | 3a, 5             | 3a, 5, 6a, 10      |
| 5    | 96.9 (CH)              | 6.39 (d, 7.1, 1H)           | 4, 6a, 9, 11      | 4                 | 3, 4, 10           |
| 6a   | 102.6 (CH)             | 6.07 (d, 4, 1H)             | 2, 3, 3a          | 3a                | 3a, 4              |
| 7    | 169.4 (C)              |                             |                   |                   |                    |
| 8    | 20.7 ( $\text{CH}_3$ ) | 2.20 (s, 3H)                | 7                 |                   | 10                 |
| 9    | 31.4 (C)               |                             |                   |                   |                    |
| 10   | 29.0 ( $\text{CH}_3$ ) | 1.04 (s, 9H)                | 4, 9              |                   | 3, 3a, 4, 5, 8, 12 |
| 11   | 169.8 (C)              |                             |                   |                   |                    |
| 12   | 21.3 ( $\text{CH}_3$ ) | 2.11 (s, 3H)                | 11                |                   | 10                 |

<sup>a</sup>Carbons that correlate to the proton resonance. Optimized for 10 Hz coupling. <sup>b</sup>Protons that correlate to the proton resonance.

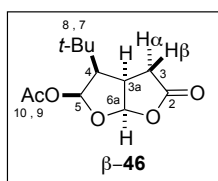

Table S4.  $^1\text{H}$  (500 MHz),  $^{13}\text{C}$  (125 MHz), HMBC, COSY, and NOE NMR data for  **$\beta$ -46**,  $\text{C}_6\text{D}_6$

| atom | $^{13}\text{C}$ (mult) | $^1\text{H}$ mult, $J$ (Hz)                                                   | HMBC <sup>a</sup>    | COSY <sup>b</sup>                   | 1D-NOE <sup>b</sup> |
|------|------------------------|-------------------------------------------------------------------------------|----------------------|-------------------------------------|---------------------|
| 2    | 175.1 (C)              |                                                                               |                      |                                     |                     |
| 3    | 30.1 ( $\text{CH}_2$ ) | 3- $\alpha$ ; 1.87 (dd, overlap, 1H)<br>3- $\beta$ ; 2.80 (dd, 6.4, 17.1, 1H) | 2, 3a, 4<br>2, 3a, 4 | 3- $\beta$ , 3a<br>3- $\alpha$ , 3a |                     |
| 3a   | 54.0 (CH)              | 1.87 (overlap m, 1H)                                                          | 3, 4, 5              | 3- $\alpha$ , 3- $\beta$ , 6a       |                     |
| 4    | 38.1 (CH)              | 1.21 (t, 7.0, 1H)                                                             | 5, 8, 10             | 3a                                  | 5, 10               |
| 5    | 97.0 (CH)              | 6.33 (d, 4.1, 1H)                                                             | 4, 6a, 7             | 4                                   | 4, 10 (weak)        |
| 6a   | 107.3 (CH)             | 5.44 (d, 5.5, 1H)                                                             | 2, 5, 4              | 3a                                  | 3a                  |
| 7    | 168.6 (C)              |                                                                               |                      |                                     |                     |
| 8    | 20.7 ( $\text{CH}_3$ ) | 1.41 (s, 3H)                                                                  | 4                    |                                     | 3- $\beta$ , 5, 10  |
| 9    | 30.3 (C)               |                                                                               |                      |                                     |                     |
| 10   | 29.5 ( $\text{CH}_3$ ) | 0.60 (s, 9H)                                                                  | 5                    |                                     | 3- $\beta$          |

<sup>a</sup>Carbons that correlate to the proton resonance. Optimized for 10 Hz coupling. <sup>b</sup>Protons that correlate to the proton resonance.



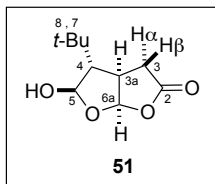

Table S5.  $^1\text{H}$  (500 MHz),  $^{13}\text{C}$  (125 MHz), HMBC, COSY, and NOESY NMR data for **51**,  $\text{CDCl}_3$

| atom | $^{13}\text{C}$ (mult) | $^1\text{H}$ mult, $J$ (Hz)                                                      | HMBC <sup>a</sup> | COSY <sup>b</sup>                   | NOESY <sup>b</sup>                           |
|------|------------------------|----------------------------------------------------------------------------------|-------------------|-------------------------------------|----------------------------------------------|
| 2    | 175.6 (C)              |                                                                                  |                   |                                     |                                              |
| 3    | 36.7 ( $\text{CH}_2$ ) | 3- $\alpha$ ; 2.91 (dd, 11.0, 18.2, 1H)<br>3- $\beta$ ; 2.70 (dd, 3.6, 18.2, 1H) | 2, 3a, 4, 6a      | 3a, 3- $\beta$<br>3a, 3- $\alpha$   | 3a, 3- $\beta$ , 8<br>3a, 3- $\alpha$ , 4, 8 |
| 3a   | 39.6 (CH)              | 2.97 (m, 1H)                                                                     |                   | 3- $\alpha$ , 3- $\beta$ , 4,<br>6a | 3- $\alpha$ , 3- $\beta$ ,<br>6a, 8          |
| 4    | 64.5 (CH)              | 1.98 (d, 1.7, 1H)                                                                | 3, 5, 6a, 7,<br>8 | 3a, 5                               | 3- $\beta$ , 8                               |
| 5    | 102.7 (CH)             | 5.58 (s, 1H)                                                                     | 3a, 4, 6a, 7      | 4                                   | 8                                            |
| 6a   | 109.3 (CH)             | 6.07 (d, 6.0, 1H)                                                                | 2, 3a, 5          | 3a                                  | 3a, 8                                        |
| 7    | 31.4 (C)               |                                                                                  |                   |                                     |                                              |
| 8    | 27.4 ( $\text{CH}_3$ ) | 0.95 (s, 9H)                                                                     | 4, 7              |                                     | 3a, 3- $\alpha$ , 3- $\beta$ ,<br>4, 5, 6a   |

<sup>a</sup>Carbons that correlate to the proton resonance. Optimized for 10 Hz coupling. <sup>b</sup>Protons that correlate to the proton resonance.

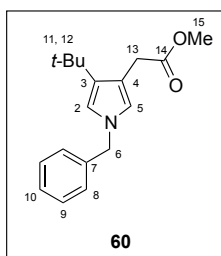

Table S6.  $^1\text{H}$  (500 MHz),  $^{13}\text{C}$  (125 MHz), HMBC, COSY, and NOESY NMR data for **60**,  $\text{CDCl}_3$

| atom | $^{13}\text{C}$ (mult)  | $^1\text{H}$ mult, $J$ (Hz) | HMBC <sup>a</sup> | COSY <sup>b</sup> | NOESY <sup>b</sup> |
|------|-------------------------|-----------------------------|-------------------|-------------------|--------------------|
| 2    | 117.7 (CH)              | 6.4 (d, 2.5, 1H)            | 3, 4, 5, 6, 11    | 5                 | 6, 12              |
| 3    | 132.5 (C)               |                             |                   |                   |                    |
| 4    | 113.4 (C)               |                             |                   |                   |                    |
| 5    | 122.1 (CH)              | 6.59 (d, 2.5, 1H)           | 2, 3, 4           | 2, 13             | 6, 13              |
| 6    | 53.5 ( $\text{CH}_2$ )  | 4.95, (s, 2H)               | 2, 5, 7, 8        | 8                 | 2, 5, 8            |
| 7    | 138.4 (C)               |                             |                   |                   |                    |
| 8    | 127.4 (CH)              | 7.14 (m, 2H)                | 9                 | 6, 9, 10          | 6, 10              |
| 9    | 127.8 (CH)              | 7.29 (m, 1H)                |                   | 8, 10             |                    |
| 10   | 128.9 (CH)              | 7.33 (m, 2H)                | 7                 | 8, 9              | 8                  |
| 11   | 31.44 (C)               |                             |                   |                   |                    |
| 12   | 31.40 ( $\text{CH}_3$ ) | 1.26 (s, 9H)                | 3, 11             |                   | 2, 13, 15          |
| 13   | 33.1 ( $\text{CH}_2$ )  | 3.63 (s, 2H)                | 3, 4, 5, 14       | 5                 | 5, 12              |
| 14   | 173.5 (C)               |                             |                   |                   |                    |
| 15   | 52.1 ( $\text{CH}_3$ )  | 3.70 (s, 3H)                | 14                |                   | 12                 |

<sup>a</sup>Carbons that correlate to the proton resonance. Optimized for 10 Hz coupling. <sup>b</sup>Protons that correlate to the proton resonance.

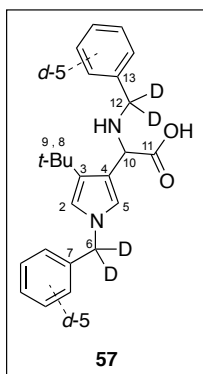

Table S7.  $^1\text{H}$  (500 MHz),  $^{13}\text{C}$  (125 MHz), HMBC, and COSY NMR data for **57**,  $\text{CD}_3\text{OD}$

| atom | $^{13}\text{C}$ (mult) | $^1\text{H}$ mult, $J$ (Hz) | HMBC <sup>a</sup>     | COSY <sup>c</sup> |
|------|------------------------|-----------------------------|-----------------------|-------------------|
| 2    | 118.6 (CH)             | 6.47 (d, 2.5, 1H)           | 3, 4 <sup>b</sup> , 5 | 5                 |
| 3    | 134.0 (C)              |                             |                       |                   |
| 4    | 117.4 (C)              |                             |                       |                   |
| 5    | 122.6 (CH)             | 6.94 (d, 2.4, 1H)           | 2, 3, 4               | 2                 |
| 7    | 139.5 (C)              |                             |                       |                   |
| 8    | 28.5 (C)               |                             |                       |                   |
| 9    | 32.5 ( $\text{CH}_3$ ) | 1.14 (s, 9H)                | 2, 3, 8               |                   |
| 10   | 59.6 (CH)              | 4.63 (s, 1H)                | 3, 4, 5, 11           |                   |
| 11   | 174.6 (C)              |                             |                       |                   |
| 13   | 133.3 (C)              |                             |                       |                   |

<sup>a</sup>Carbons that correlate to the proton resonance; Optimized for 2 Hz and 10 Hz coupling; correlations observed only in the 2 Hz experiment are in italics font. <sup>b</sup>Only observed in 10Hz experiment. <sup>c</sup>Protons that correlate to the proton resonance.

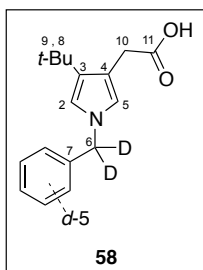

Table S8.  $^1\text{H}$  (500 MHz),  $^{13}\text{C}$  (125 MHz), HMBC, and COSY NMR data for **58**,  $\text{CD}_3\text{OD}$

| atom | $^{13}\text{C}$ (mult) | $^1\text{H}$ mult, $J$ (Hz) | HMBC <sup>a</sup>     | COSY <sup>b</sup> |
|------|------------------------|-----------------------------|-----------------------|-------------------|
| 2    | 117.9 (CH)             | 6.36 (d, 2.5, 1H)           | 3, 4, 5, 8, <i>10</i> | 5                 |
| 3    | 133.3 (C)              |                             |                       |                   |
| 4    | 118.2 (C)              |                             |                       |                   |
| 5    | 122.7 (CH)             | 6.54 (d, 2.5, 1H)           | 2, 3, 4, 8, <i>10</i> | 2                 |
| 7    | 141.1 (C)              |                             |                       |                   |
| 8    | 32.4 (C)               |                             |                       |                   |
| 9    | 31.8 ( $\text{CH}_3$ ) | 1.24 (s, 9H)                | 2, 3, 4, 8            |                   |
| 10   | 38.5 ( $\text{CH}_2$ ) | 3.43 (s, 2H)                | 3, 4, 5, 8, 11        |                   |
| 11   | 182.0 (C)              |                             |                       |                   |

<sup>a</sup>Carbons that correlate to the proton resonance; Optimized for 2 Hz and 10 Hz coupling; correlations observed only in the 2 Hz experiment are in italics font. <sup>b</sup>Protons that correlate to the proton resonance.

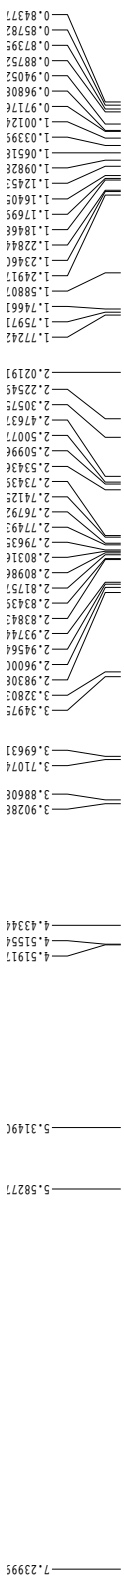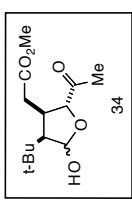

Current Data Parameters  
 USER schner  
 NAME m1s4-94-3-2conc  
 EXPNO 1  
 PROCNO 1

F2 - Acquisition Parameters  
 Date\_ 20110607  
 Time 11:54  
 NS000H 6779300  
 PULPROG zgpg30  
 FIDRES 5 mm CPXCL1 620  
 TD 81728  
 SOLVENT CDCl3  
 NS 5  
 DS 2  
 SWH 8012.820 Hz  
 FIDRES 0.098043 Hz  
 AQ 5.0998774 sec  
 RG 4.5  
 DW 62.400 usec  
 DE 6.00 usec  
 TE 298.0 K  
 MCREST 0.1000000 sec  
 MCHNK 0.01500000 sec  
 ===== CHANNEL f1 =====  
 NUCl 1H  
 P1 7.50 usec  
 PL1 1.60 dB  
 SFO1 500.2235015 MHz

F2 - Processing parameters  
 SI 65536  
 SF 500.2230423 MHz  
 WDW EM  
 SS 0.30 Hz  
 GB 0  
 PC 4.00

1D NMR plot parameters  
 CX 22.80 cm  
 CY 15.00 cm  
 F1P 7.807 ppm  
 F1 3905.30 Hz  
 F2P 0.293 ppm  
 F2 146.71 Hz  
 PRCH 0.382956 ppm/cm  
 HZCX 164.85056 Hz/cm

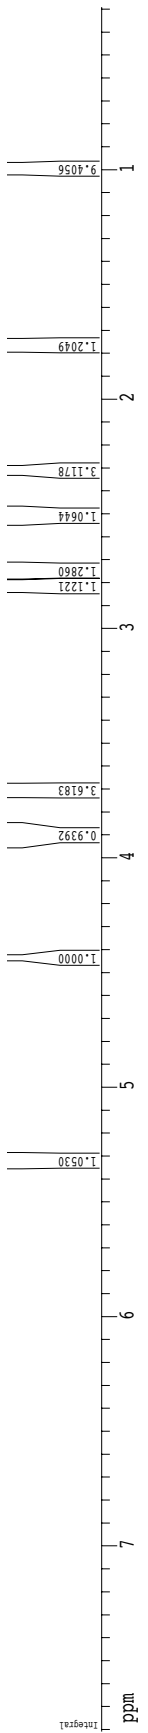

Z-restored spin-echo <sup>13</sup>C spectrum with <sup>1</sup>H decoupling

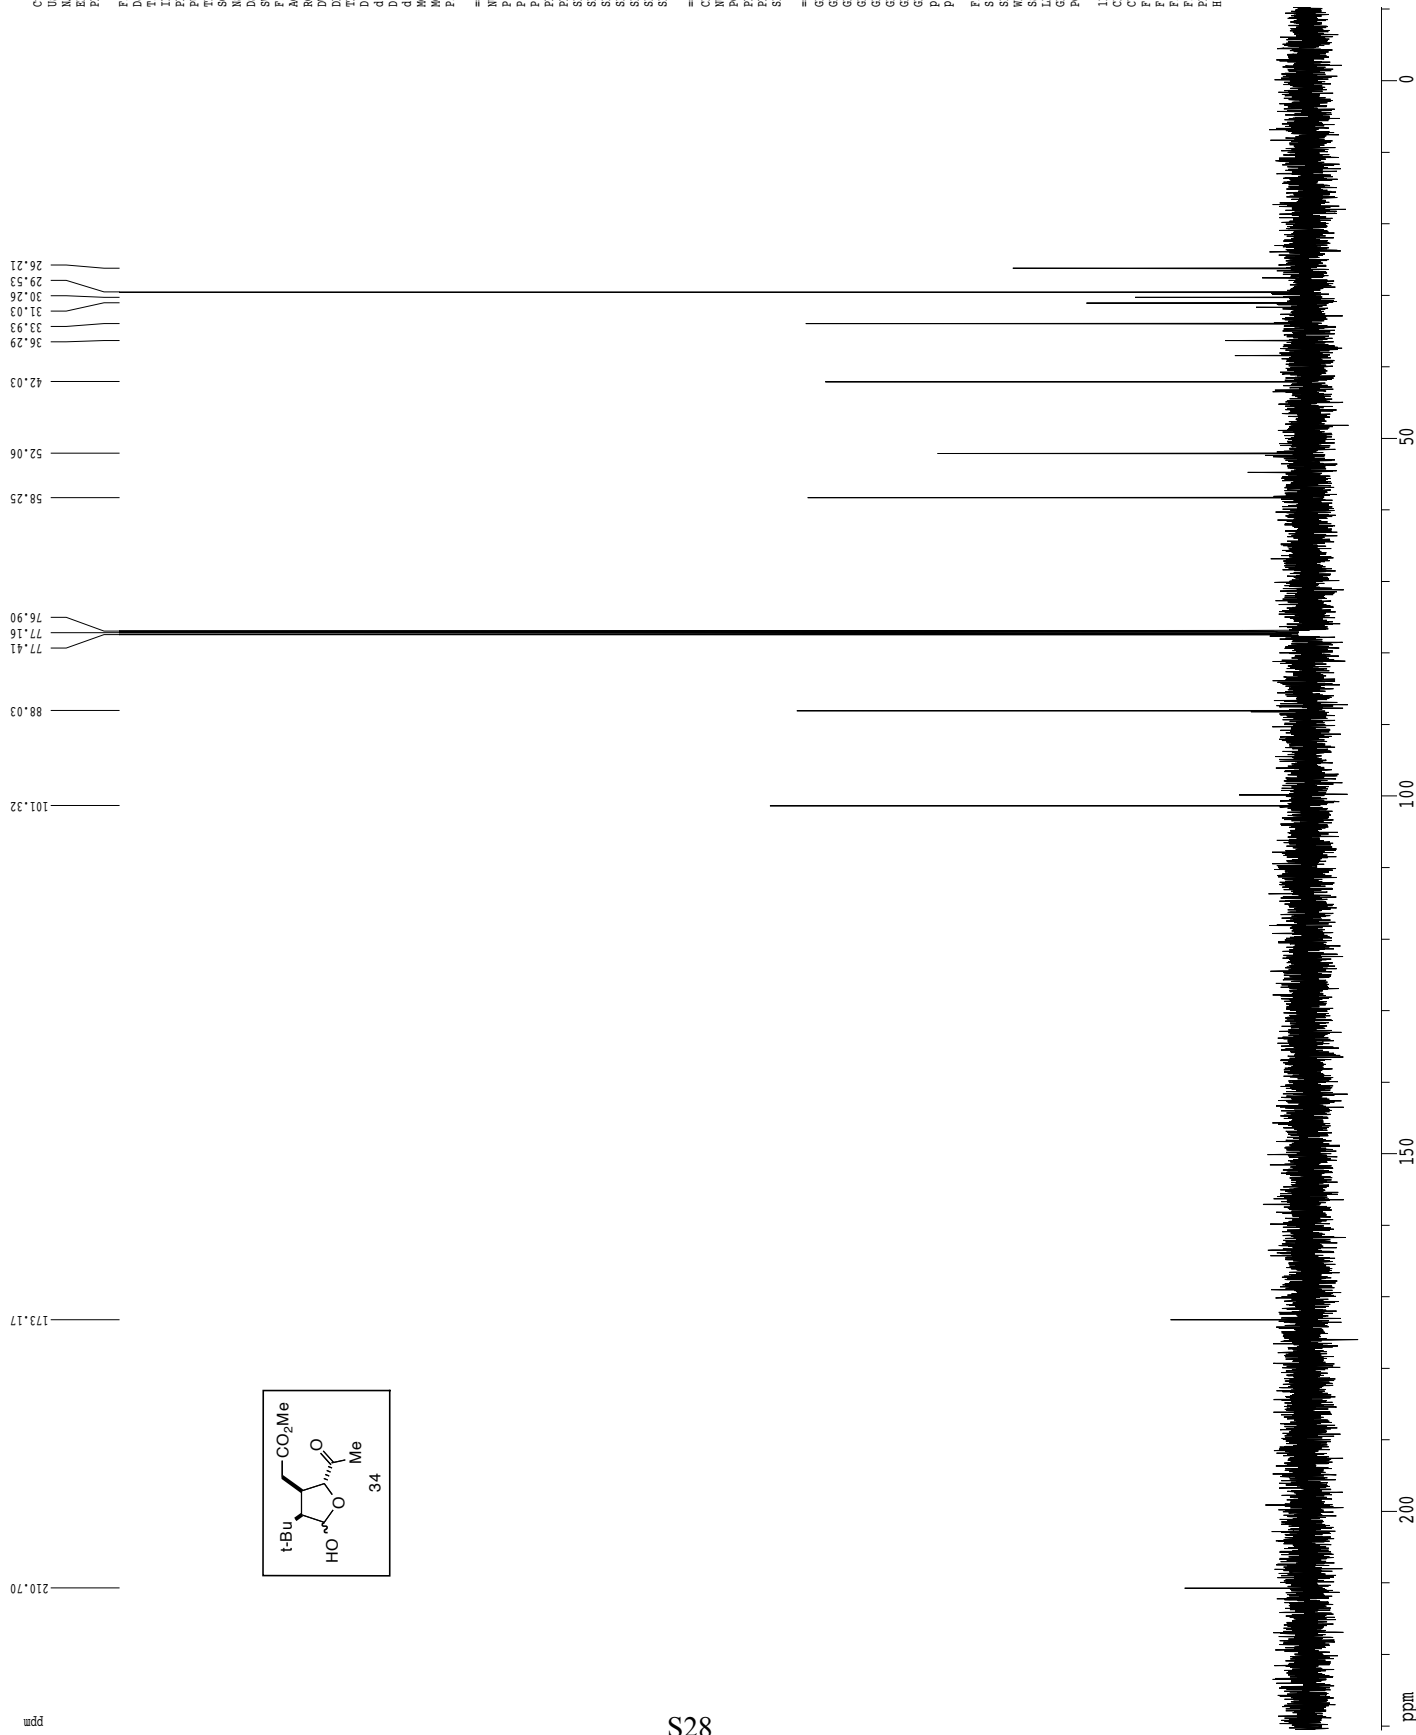

<sup>1</sup>H spectrum

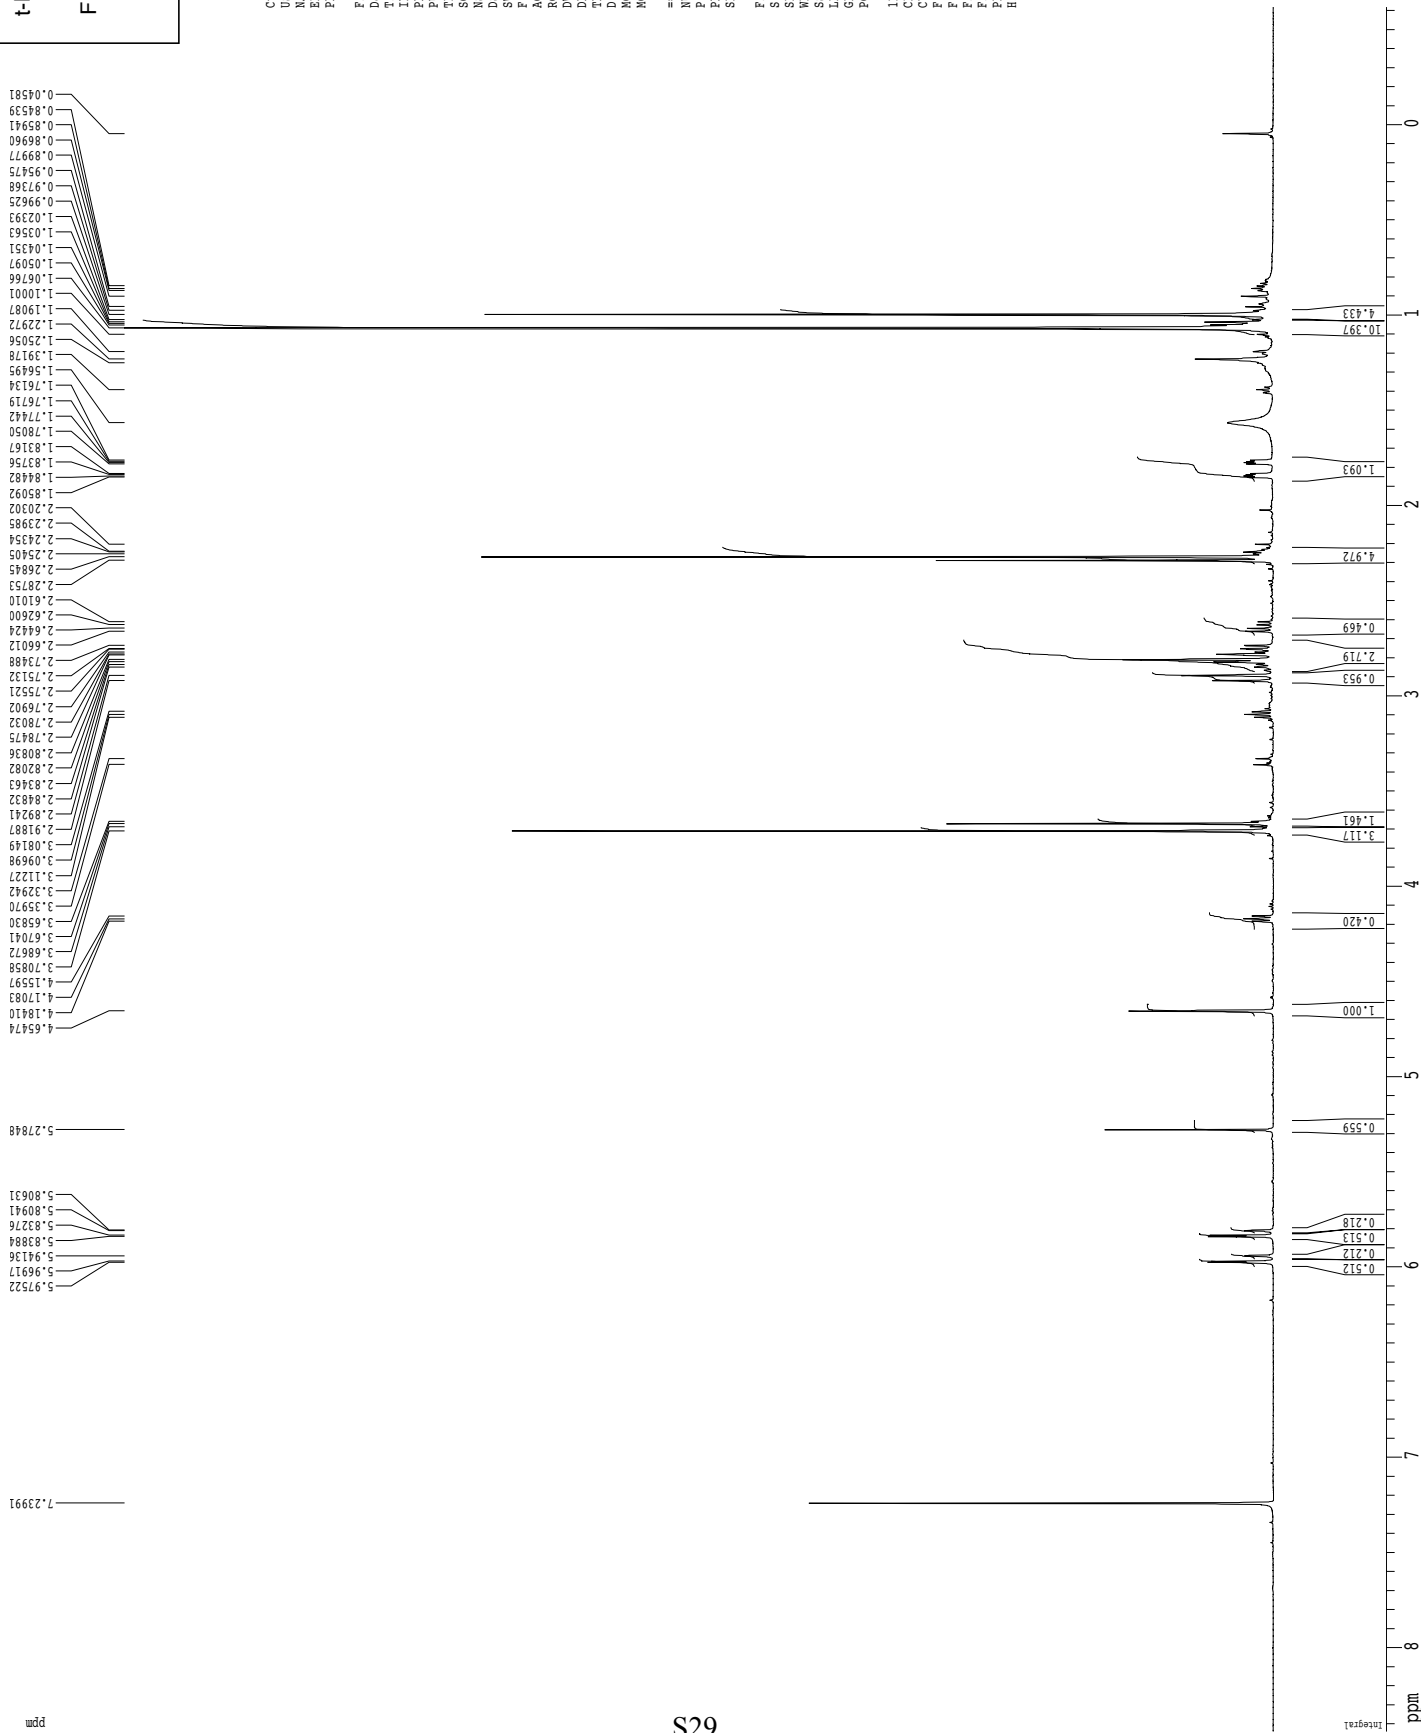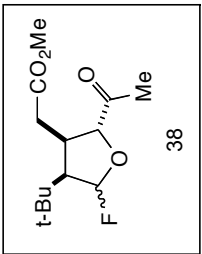

Current Data Parameters  
 USER schner  
 NAME mjs4-96a-2  
 EXPNO 1  
 PROCNO 1

F2 - Acquisition Parameters  
 Date\_ 20110607  
 Time 15.36  
 INSTRUM cryo500  
 PROBHD 5 mm CPXI 1H-  
 PULPROG zg30  
 TD 81728  
 SOLVENT CDCl3  
 NS 16  
 DS 2  
 SWH 8012.820 Hz  
 FIDRES 0.098043 Hz  
 AQ 5.0990774 sec  
 RG 475  
 DR 62.600 usec  
 DE 6.00 usec  
 TE 298.0 K  
 D1 0.10000000 sec  
 MCREST 0.00000000 sec  
 MCWRK 0.01500000 sec

==== CHANNEL f1 =====  
 NUC1 1H  
 P1 7.50 usec  
 PL1 1.00 dB  
 SFO1 500.2235015 MHz

F2 - Processing parameters  
 SI 32768  
 SF 500.2204223 MHz  
 GSSFC  
 WDW EM  
 SSB 0  
 LB 0.30 Hz  
 GB 0  
 PC 4.00

1D NMR plot parameters  
 CX 22.80 cm  
 CY 20.00 cm  
 FIP 8.428 ppm  
 F2 4220.64 Hz  
 F3 106.48 Hz  
 FZ -108.00 ppm  
 PPM0 0.38707 ppm/cm  
 HZCM 198.62453 Hz/cm

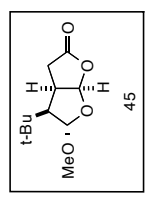

Current Data Parameters  
 USER genung  
 NAME NEG-I-172  
 EXPNO 2  
 PROCNO 1

F2 - Acquisition Parameters  
 Date\_ 20101105  
 Time 8:26  
 NS000H cryo300  
 PULPROG zgpg30  
 PRGNAME 5 mm CPXCL1  
 FIDRES 0.098043 Hz  
 AQ 5.0998774 sec  
 RG 7.1  
 DW 62.400 usec  
 DE 6.00 usec  
 TE 298.0 K  
 MCREST 0.1000000 sec  
 MCRBK 0.01500000 sec  
 ===== CHANNEL f1 =====  
 NUCL 1H  
 P1 7.50 usec  
 PL1 1.60 dB  
 SFO1 500.2235015 MHz

F2 - Processing parameters  
 SI 65536  
 SF 500.2200272 MHz  
 WDW EM  
 SS 0  
 GB 0.30 Hz  
 GR 0  
 PC 4.00

1D NMR plot parameters  
 CX 22.80 cm  
 CY 15.00 cm  
 F1 10.500 ppm  
 F2 5252.31 Hz  
 F3 -0.500 ppm  
 F4 230.11 Hz  
 PRCH 0.48246 ppm/cm  
 HZCX 241.33423 Hz/cm

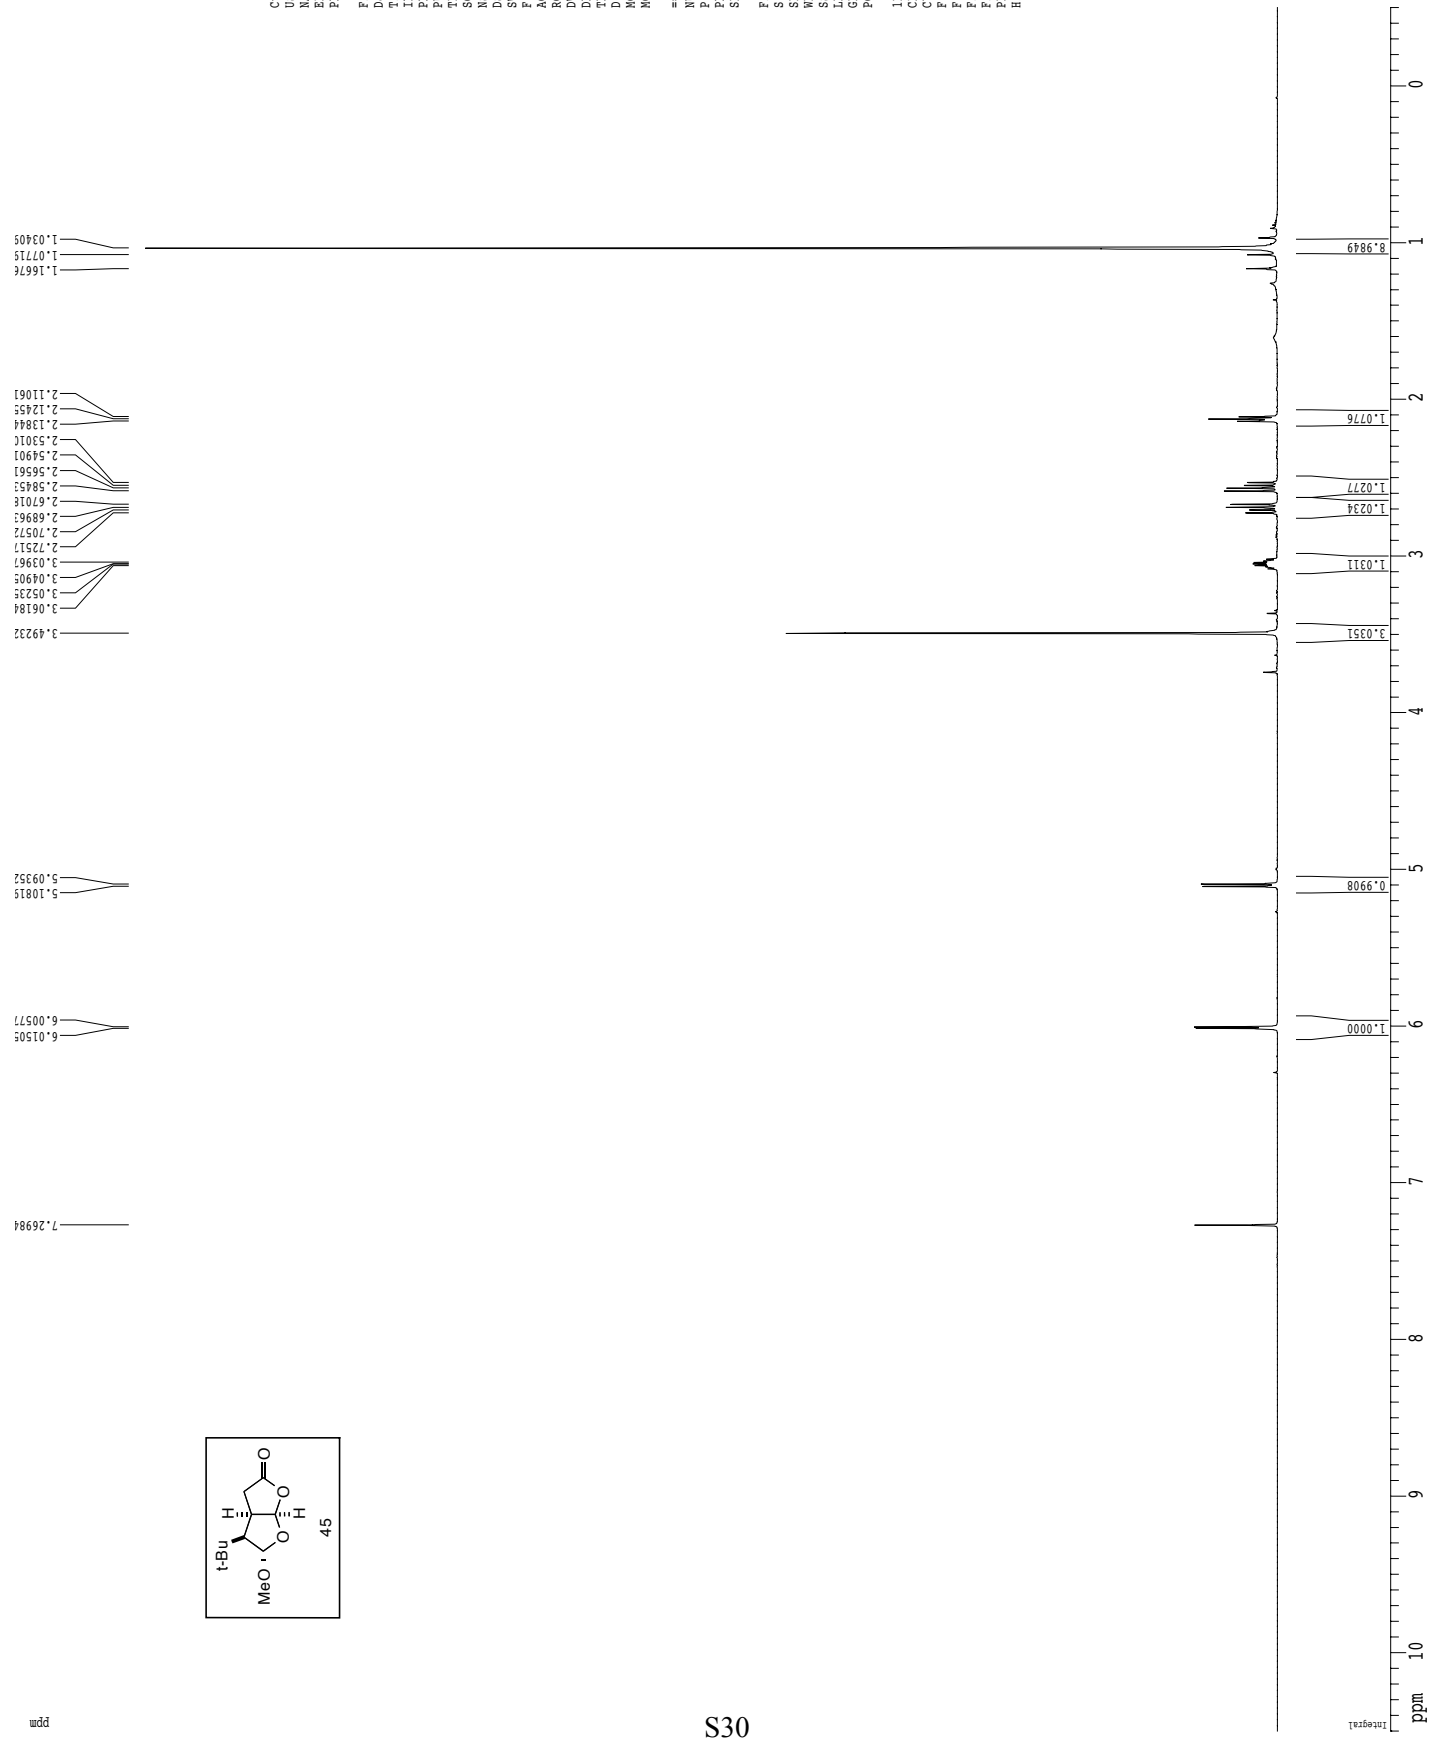



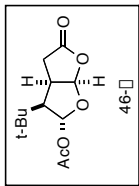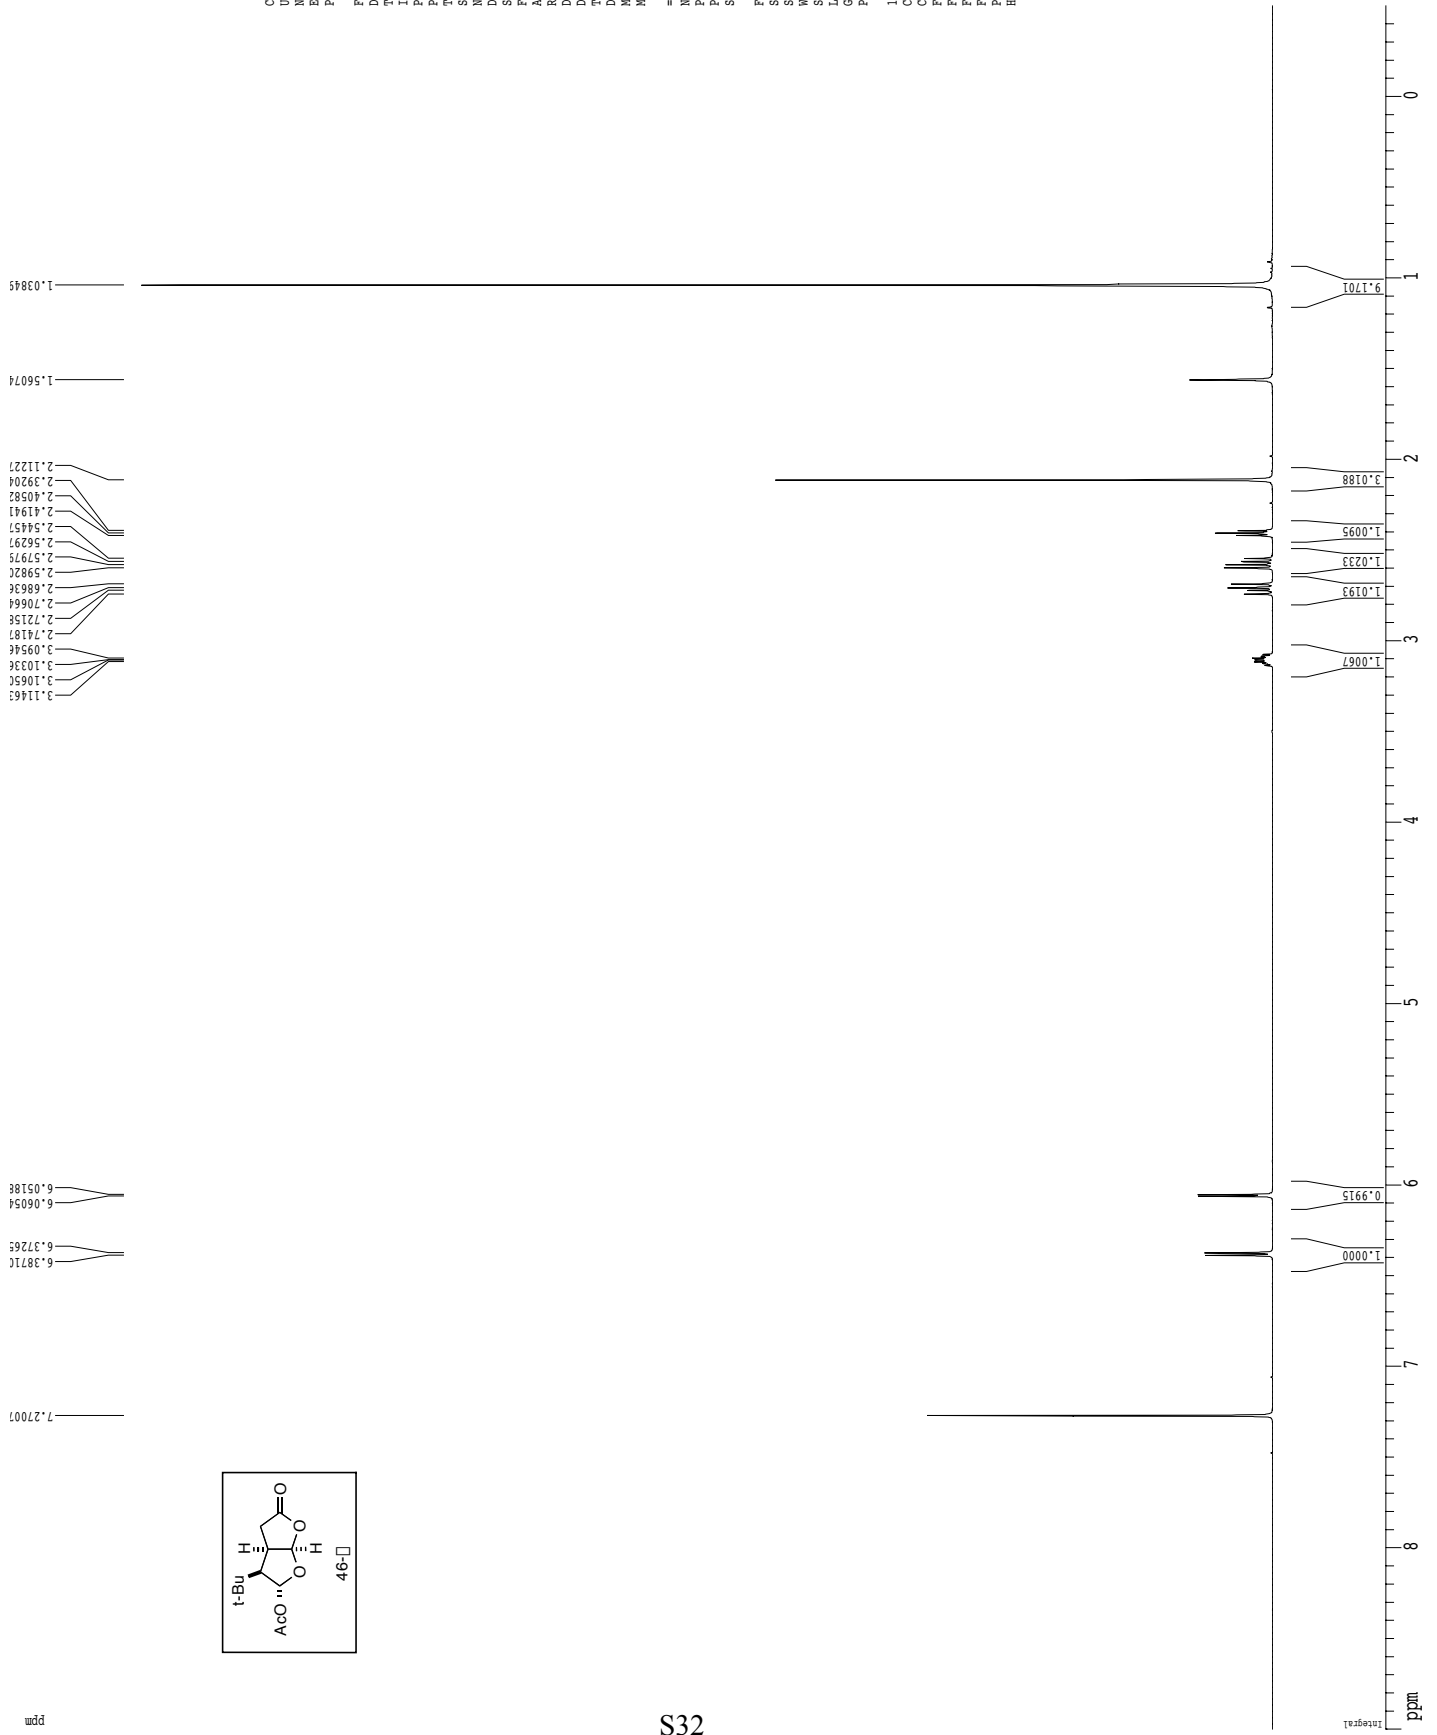

Current Data Parameters  
 USER genuing  
 SAMPLE NEG-II-097A  
 EXPNO 1  
 PROCNO 1  
 F2 - Acquisition Parameters  
 Date 20110623  
 Time 19.03  
 INSTRUM cryo500  
 PROHDH 5 mm CPCL1.H  
 PULPROG zg30  
 TD 81728  
 SOLVENT CDCl3  
 NS 8  
 DS 2  
 FWHZ 8012.822 Hz  
 AQ 0.109602 Hz  
 RG 14.3  
 AC 5.0998774 sec  
 PC 4.00  
 DW 62.400 usec  
 DE 6.00 usec  
 TE 298.0 K  
 D1 0.10000000 sec  
 MCREST 0.00000000 sec  
 MCWRR 0.01500000 sec  
 ===== CHANNEL f1 =====  
 NUC1 1H  
 P1 7.50 usec  
 PL 0.00 dB  
 SFO1 500.2235015 MHz  
 F2 - Processing parameters  
 SI 65536  
 SF 500.220260 MHz  
 WDW EM  
 SSB 0  
 LB 0.30 Hz  
 GB 0  
 PC 4.00  
 ID NMR plot parameters  
 CX 22.00 cm  
 CY 15.00 cm  
 FL1 9.000 mm  
 F1 4501.98 Hz  
 F2 -0.500 ppm  
 F2 -250.11 Hz  
 PPMCH 0.41667 ppm/cm  
 PZCH 208.42502 Hz/cm



ppm

175.55  
170.00  
105.21  
97.02  
77.48  
77.23  
76.98  
42.09  
31.48  
29.38  
21.38

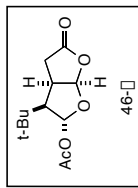

```

Current Data Parameters
USER          NEG-II-097a
NAME          NEG-II-097a
EXPNO        2
PROCNO       1

F2 - Acquisition Parameters
Date_        20110223
Time         19:07
INSTRUM      cryo
PROBHD       5 mm CPYCI 1H
PULPROG      zgpg30
TD            65536
SOLVENT      CDCl3
NS            751
DS            16
SWH           30033.031 Hz
AQ            0.462388 Hz
RG            2560.8
K1            16.500 usec
DE            6.00 usec
TE            298.0 K
D1            1.5000000 sec
D11           0.0300000 sec
D16           0.0020000 sec
DELTA        0.0035000 sec
WALTZ16      1.0000000 sec
MCKR        0.0180000 sec
MCKB        0.0180000 sec
MCCR        0.0180000 sec
P2            31.00 usec

===== CHANNEL F1 =====
NUC1          13C
P1            15.50 usec
F1            500.00 usec
P2            200.00 usec
F2            125.7642548 MHz
NUC2          1H
P1            1.60 usec
F1            400.00 MHz
SF01          125.7642548 MHz
SF1           3.20 dB
SF2           3.20 dB
SFO1          Cyp60.0.5, 20.1
SFO2          Cyp60comp.4
SFO3          0.00 Hz
SFO4          0.00 Hz
SFO5          0.00 Hz

===== CHANNEL F2 =====
CPDPRG2      waltz16
NUC2          1H
PCPD2        100.00 usec
PL2           1.60 dB
PL12         24.60 dB
SF02          500.2225011 MHz

===== GRADIENT CHANNEL =====
GPM1         SINE 100
GPM2         SINE 100
GAX1         0.00 %
GAX2         0.00 %
GAX3         0.00 %
GAX4         0.00 %
GAX5         0.00 %
GAX6         0.00 %
GAX7         0.00 %
GAX8         0.00 %
GAX9         0.00 %
GAX10        0.00 %
GAX11        0.00 %
GAX12        0.00 %
GAX13        0.00 %
GAX14        0.00 %
GAX15        0.00 %
GAX16        0.00 %

F2 - Processing parameters
SI            65536
SF            125.7803988 MHz
WDW           EM
SSB           0
GB            0
PC            2.00

ID NMR plot parameters
CX            22.80 cm
CY            40.00 cm
FIP           220.000 ppm
F1F2          2767.88 Hz
F2F1          -628.00 Hz
F2F2          9.86842 ppm/cm
F2F3          1241.25391 Hz/cm
HEXC         1241.25391 Hz/cm
    
```

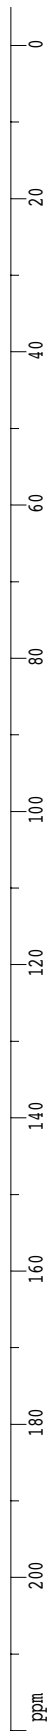

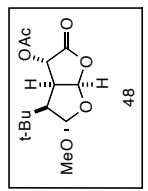

Current Data Parameters  
 USER genung  
 NAME NEG-I-180a  
 EXPNO 1  
 PROCNO 1

F2 - Acquisition Parameters  
 Date\_ 20101113  
 Time 22.54  
 INSTRUM cryo500  
 PULPROG zgpg30  
 PREROG 5 mm CPDPR1  
 TD 81728  
 SOLVENT CDCl3  
 NS 8  
 DS 2  
 SWE 8012.820 Hz  
 FIDRES 0.098043 Hz  
 AQ 5.0998774 sec  
 RG 6.3  
 DW 62.400 usec  
 DE 6.00 usec  
 TE 298.0 K  
 MCREST 0.1000000 sec  
 MCHNK 0.01500000 sec  
 ===== CHANNEL f1 =====  
 NUC1 1H  
 P1 7.50 usec  
 PL1 1.60 dB  
 SFO1 500.2235015 MHz

F2 - Processing parameters  
 SI 65536  
 SF 500.220272 MHz  
 WDW EM  
 SS 0  
 GB 0  
 PC 4.00

1D NMR plot parameters  
 CX 22.80 cm  
 CY 15.00 cm  
 F1P 10.500 ppm  
 F1 5252.31 Hz  
 F2P -0.500 ppm  
 F2 230.11 Hz  
 PRCH 0.48246 ppm/cm  
 HZCX 241.33423 Hz/cm

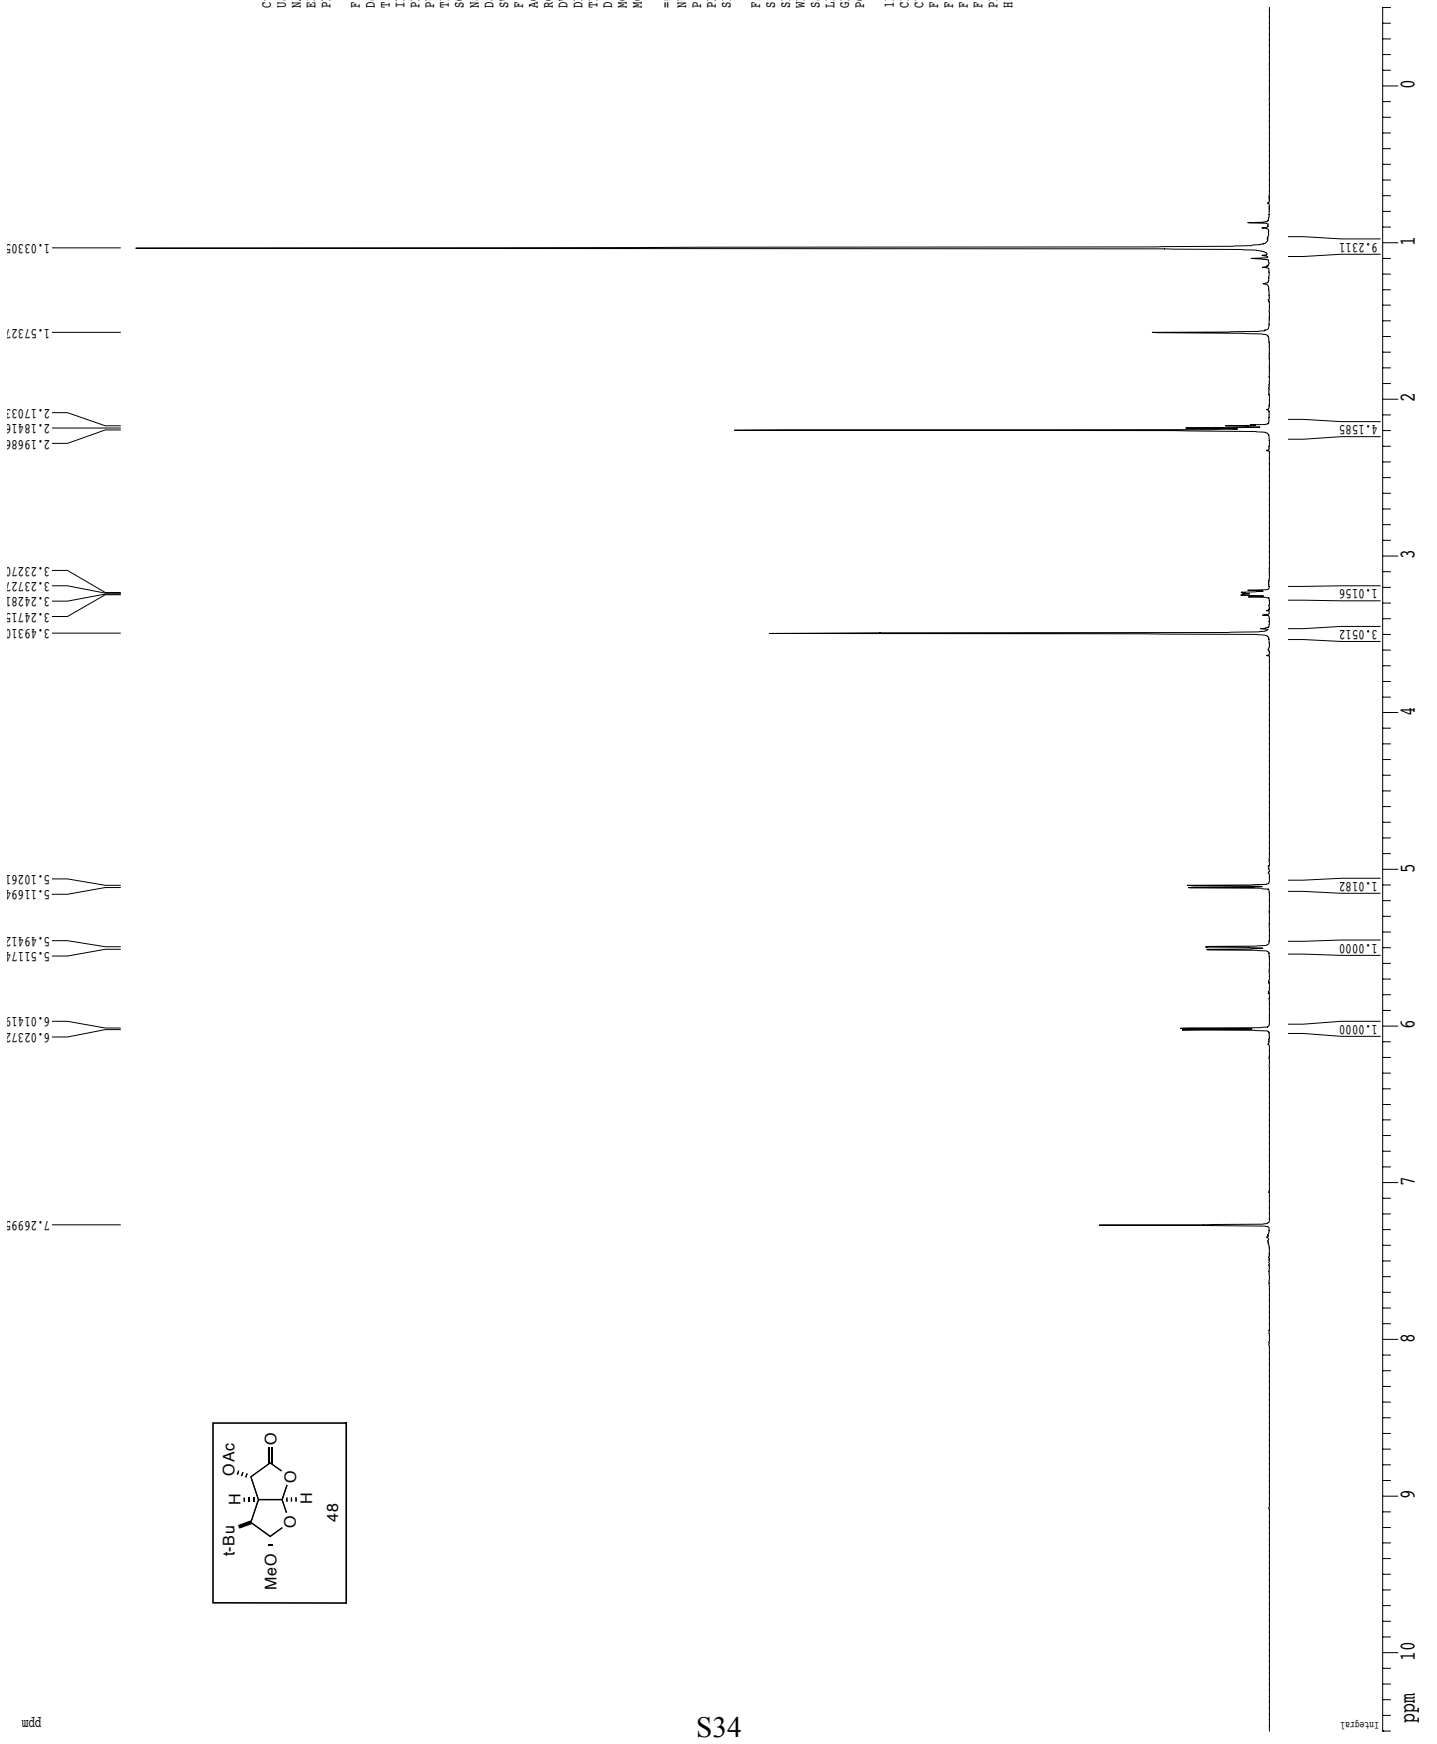

20.77  
29.31  
31.23  
46.69  
55.61  
57.22  
68.46  
76.98  
77.23  
77.48  
102.29  
106.99  
169.50  
172.27

Current Data Parameters  
 USER genny  
 NAME NEG-1-180a  
 EXPNO 2  
 PROCNO 1  
 F2 - Acquisition Parameters  
 Date\_ 20101113  
 Time\_ 23.00  
 INSTRUM cryo500  
 PROBHD 5 mm CPVC1 H-  
 PULPROG SpinEcho3Dg-prd  
 TD 6536  
 SOLVENT CDCl3  
 NS 16  
 DS 16  
 SWH 30303.031 Hz  
 FIDRES 0.462388 Hz  
 AQ 1.0813840 sec  
 RG 7296.2  
 DW 16.500 usec  
 DE 6.00 usec  
 TE 300.2 K  
 D1 0.2560000 sec  
 d11 0.0360000 sec  
 D16 0.0002000 sec  
 d17 0.0001960 sec  
 MCREST 0.0000000 sec  
 MCWRRK 0.0150000 sec  
 F2 31.00 usec  
 ===== CHANNEL f1 =====  
 NUC1 13C  
 P1 15.50 usec  
 P11 500.00 usec  
 P12 2000.00 usec  
 PL0 120.00 dB  
 PL1 -1.00 dB  
 SFO1 125.7642348 MHz  
 SF1 320 dB  
 SFO2 500.1364200 MHz  
 SF2 320 dB  
 SPAN1 Crp60.0.5.20.0 dB  
 SPAN2 Crp60comp.4  
 SFOFF1 0.00 Hz  
 SFOFF2 0.00 Hz  
 ===== CHANNEL f2 =====  
 CPDPRG2 waltz16  
 NUC2 H  
 P2 100.00 usec  
 PL2 1.50 dB  
 PL3 1.50 dB  
 PL4 1.50 dB  
 SFO2 500.2225011 MHz  
 ===== GRADIENT CHANNEL =====  
 GPRAM1 SINE.100  
 GPRAM2 SINE.100  
 GPC1 0.00 %  
 GPC2 0.00 %  
 GPC3 0.00 %  
 GPC4 0.00 %  
 GPC5 0.00 %  
 GPC6 0.00 %  
 GPC7 30.00 %  
 GPC8 50.00 %  
 p15 500.00 usec  
 p16 1000.00 usec  
 F2 - Processing parameters  
 SI 32768  
 SF 125.7603903 MHz  
 NDW EN  
 SSB 0  
 LB 1.00 Hz  
 GB 0  
 PC 2.00  
 ID\_NMR plot parameters  
 X 120.00 cm  
 Y 120.00 cm  
 CT 15.65 cm  
 F1P 220.000 ppm  
 F1 27671.69 Hz  
 F2P -5.000 ppm  
 F2 -628.90 Hz  
 PPRCM 9.86842 ppm/cm  
 HZCM 1241.2591 Hz/cm

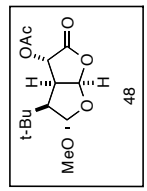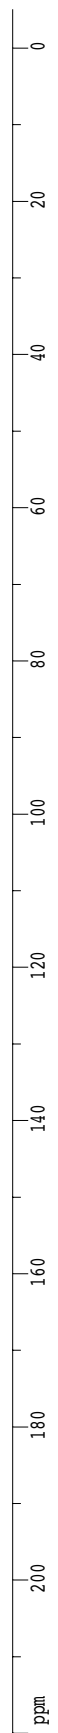

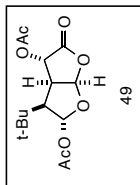

Current Data Parameters  
 USER gemung  
 NAME NEG-II-069  
 EXPNO 1  
 PROCNO 1  
 F2 - Acquisition Parameters  
 Date 20110507  
 Time 17.53  
 INSTRUM cryo500  
 PROHD 5 mm CPCL IH-  
 PULPROG zg30  
 TD 81728  
 SOLVENT CDCl3  
 NS 8  
 DS 2  
 FWHZ 8012.82 Hz  
 AQRES 0.109623 Hz  
 ACRES 0.109623 Hz  
 RG 3.6  
 DW 62.400 usec  
 DE 6.00 usec  
 TE 298.0 K  
 D1 0.10000000 sec  
 MCREST 0.00000000 sec  
 MCWRR 0.01500000 sec  
 ===== CHANNEL f1 =====  
 NUC1 1H  
 P1 7.50 usec  
 PL 0.00 dB  
 SFO1 500.223015 MHz  
 F2 - Processing parameters  
 SI 65536  
 SF 500.2200272 MHz  
 WDW EM  
 SSB 0  
 LB 0.30 Hz  
 GB 0  
 PC 4.00  
 ID NMR plot parameters  
 CX 22.00 cm  
 CY 15.00 cm  
 FLIP 9.000 ppm  
 F1 4501.98 Hz  
 F2P -0.500 ppm  
 F2 -250.11 Hz  
 PPMCM 0.41667 ppm/cm  
 HZCM 208.42502 Hz/cm

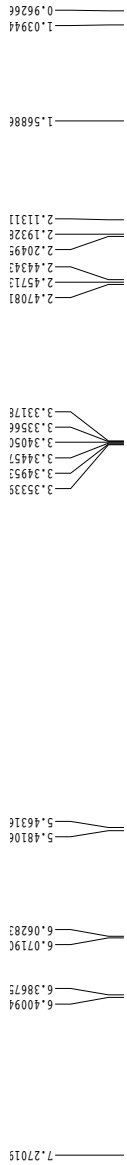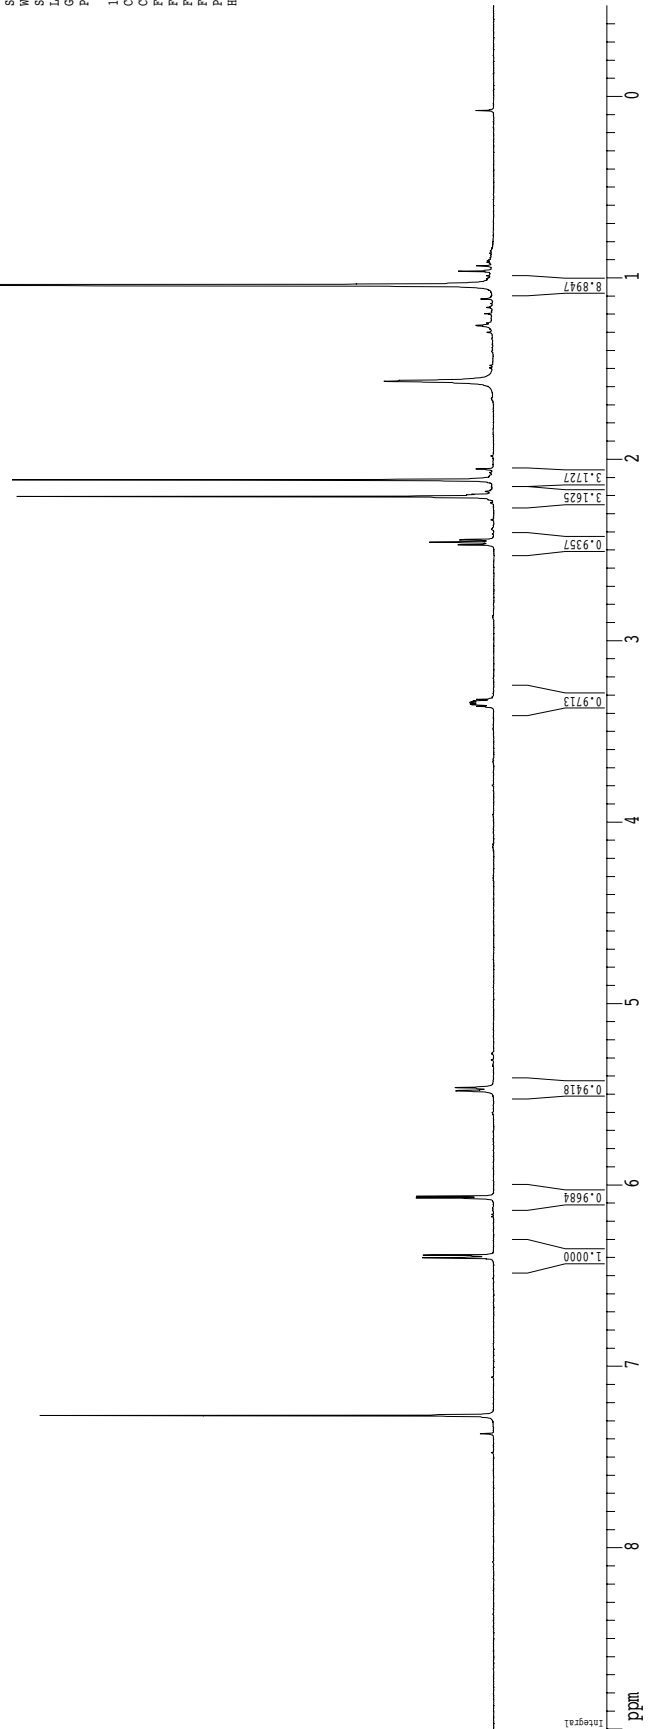

ppm

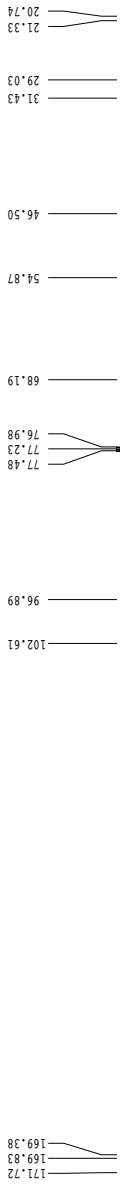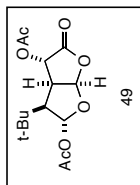

Current Data Parameters  
USER: NEG-II-069  
NAME: NEG-II-069  
EXPNO: 6  
PROCNO: 1

F2 - Acquisition Parameters  
Date\_: 20110507  
Time: 17:35  
PULPROG: zgpg30  
PROBHD: 5 mm CPYCI 1H  
PULPROG: SpineEcho3Dpp.prd  
TD: 65536  
SOLVENT: CDCl3  
NS: 1024  
DS: 16  
SWH: 30003.031 Hz  
FIDRES: 0.462388 Hz  
AQ: 1.92589 sec  
RG: 72.989  
DW: 16.500 usec  
DE: 6.00 usec  
TE: 298.0 K  
D1: 1.5000000 sec  
D11: 0.0300000 sec  
D16: 0.0020000 sec  
DELTA: 0.0035000 sec  
WALTZ16: 0.0000000 sec  
MCKEN: 0.0180000 sec  
P2: 31.00 usec

===== CHANNEL f1 =====  
NUC1: 13C  
P1: 15.50 usec  
PL1: 500.00 usec  
PL2: 2000.00 usec  
PL3: 14.00 dB  
PL4: 1.00 dB  
PL5: 1.00 dB  
PL6: 1.00 dB  
PL7: 1.00 dB  
PL8: 1.00 dB  
PL9: 1.00 dB  
PL10: 1.00 dB  
PL11: 1.00 dB  
PL12: 1.00 dB  
PL13: 1.00 dB  
PL14: 1.00 dB  
PL15: 1.00 dB  
PL16: 1.00 dB  
PL17: 1.00 dB  
PL18: 1.00 dB  
PL19: 1.00 dB  
PL20: 1.00 dB  
PL21: 1.00 dB  
PL22: 1.00 dB  
PL23: 1.00 dB  
PL24: 1.00 dB  
PL25: 1.00 dB  
PL26: 1.00 dB  
PL27: 1.00 dB  
PL28: 1.00 dB  
PL29: 1.00 dB  
PL30: 1.00 dB  
PL31: 1.00 dB  
PL32: 1.00 dB  
PL33: 1.00 dB  
PL34: 1.00 dB  
PL35: 1.00 dB  
PL36: 1.00 dB  
PL37: 1.00 dB  
PL38: 1.00 dB  
PL39: 1.00 dB  
PL40: 1.00 dB  
PL41: 1.00 dB  
PL42: 1.00 dB  
PL43: 1.00 dB  
PL44: 1.00 dB  
PL45: 1.00 dB  
PL46: 1.00 dB  
PL47: 1.00 dB  
PL48: 1.00 dB  
PL49: 1.00 dB  
PL50: 1.00 dB  
PL51: 1.00 dB  
PL52: 1.00 dB  
PL53: 1.00 dB  
PL54: 1.00 dB  
PL55: 1.00 dB  
PL56: 1.00 dB  
PL57: 1.00 dB  
PL58: 1.00 dB  
PL59: 1.00 dB  
PL60: 1.00 dB  
PL61: 1.00 dB  
PL62: 1.00 dB  
PL63: 1.00 dB  
PL64: 1.00 dB  
PL65: 1.00 dB  
PL66: 1.00 dB  
PL67: 1.00 dB  
PL68: 1.00 dB  
PL69: 1.00 dB  
PL70: 1.00 dB  
PL71: 1.00 dB  
PL72: 1.00 dB  
PL73: 1.00 dB  
PL74: 1.00 dB  
PL75: 1.00 dB  
PL76: 1.00 dB  
PL77: 1.00 dB  
PL78: 1.00 dB  
PL79: 1.00 dB  
PL80: 1.00 dB  
PL81: 1.00 dB  
PL82: 1.00 dB  
PL83: 1.00 dB  
PL84: 1.00 dB  
PL85: 1.00 dB  
PL86: 1.00 dB  
PL87: 1.00 dB  
PL88: 1.00 dB  
PL89: 1.00 dB  
PL90: 1.00 dB  
PL91: 1.00 dB  
PL92: 1.00 dB  
PL93: 1.00 dB  
PL94: 1.00 dB  
PL95: 1.00 dB  
PL96: 1.00 dB  
PL97: 1.00 dB  
PL98: 1.00 dB  
PL99: 1.00 dB  
PL100: 1.00 dB

===== CHANNEL f2 =====  
CPDPRG2: waltz16  
NUC2: 1H  
PCPD2: 100.00 usec  
PL2: 1.60 dB  
PL3: 1.60 dB  
PL4: 1.60 dB  
PL5: 1.60 dB  
PL6: 1.60 dB  
PL7: 1.60 dB  
PL8: 1.60 dB  
PL9: 1.60 dB  
PL10: 1.60 dB  
PL11: 1.60 dB  
PL12: 1.60 dB  
PL13: 1.60 dB  
PL14: 1.60 dB  
PL15: 1.60 dB  
PL16: 1.60 dB  
PL17: 1.60 dB  
PL18: 1.60 dB  
PL19: 1.60 dB  
PL20: 1.60 dB  
PL21: 1.60 dB  
PL22: 1.60 dB  
PL23: 1.60 dB  
PL24: 1.60 dB  
PL25: 1.60 dB  
PL26: 1.60 dB  
PL27: 1.60 dB  
PL28: 1.60 dB  
PL29: 1.60 dB  
PL30: 1.60 dB  
PL31: 1.60 dB  
PL32: 1.60 dB  
PL33: 1.60 dB  
PL34: 1.60 dB  
PL35: 1.60 dB  
PL36: 1.60 dB  
PL37: 1.60 dB  
PL38: 1.60 dB  
PL39: 1.60 dB  
PL40: 1.60 dB  
PL41: 1.60 dB  
PL42: 1.60 dB  
PL43: 1.60 dB  
PL44: 1.60 dB  
PL45: 1.60 dB  
PL46: 1.60 dB  
PL47: 1.60 dB  
PL48: 1.60 dB  
PL49: 1.60 dB  
PL50: 1.60 dB  
PL51: 1.60 dB  
PL52: 1.60 dB  
PL53: 1.60 dB  
PL54: 1.60 dB  
PL55: 1.60 dB  
PL56: 1.60 dB  
PL57: 1.60 dB  
PL58: 1.60 dB  
PL59: 1.60 dB  
PL60: 1.60 dB  
PL61: 1.60 dB  
PL62: 1.60 dB  
PL63: 1.60 dB  
PL64: 1.60 dB  
PL65: 1.60 dB  
PL66: 1.60 dB  
PL67: 1.60 dB  
PL68: 1.60 dB  
PL69: 1.60 dB  
PL70: 1.60 dB  
PL71: 1.60 dB  
PL72: 1.60 dB  
PL73: 1.60 dB  
PL74: 1.60 dB  
PL75: 1.60 dB  
PL76: 1.60 dB  
PL77: 1.60 dB  
PL78: 1.60 dB  
PL79: 1.60 dB  
PL80: 1.60 dB  
PL81: 1.60 dB  
PL82: 1.60 dB  
PL83: 1.60 dB  
PL84: 1.60 dB  
PL85: 1.60 dB  
PL86: 1.60 dB  
PL87: 1.60 dB  
PL88: 1.60 dB  
PL89: 1.60 dB  
PL90: 1.60 dB  
PL91: 1.60 dB  
PL92: 1.60 dB  
PL93: 1.60 dB  
PL94: 1.60 dB  
PL95: 1.60 dB  
PL96: 1.60 dB  
PL97: 1.60 dB  
PL98: 1.60 dB  
PL99: 1.60 dB  
PL100: 1.60 dB

===== GRADIENT CHANNEL =====  
GRNAM1: SINE 100  
SINE 100  
GRPAZ: 0.00 %  
GRPX: 0.00 %  
GRPY: 0.00 %  
GRPZ: 0.00 %  
GRX1: 0.00 %  
GRX2: 0.00 %  
GRX3: 0.00 %  
GRX4: 0.00 %  
GRX5: 0.00 %  
GRX6: 0.00 %  
GRX7: 0.00 %  
GRX8: 0.00 %  
GRX9: 0.00 %  
GRX10: 0.00 %  
GRX11: 0.00 %  
GRX12: 0.00 %  
GRX13: 0.00 %  
GRX14: 0.00 %  
GRX15: 0.00 %  
GRX16: 0.00 %  
GRX17: 0.00 %  
GRX18: 0.00 %  
GRX19: 0.00 %  
GRX20: 0.00 %  
GRX21: 0.00 %  
GRX22: 0.00 %  
GRX23: 0.00 %  
GRX24: 0.00 %  
GRX25: 0.00 %  
GRX26: 0.00 %  
GRX27: 0.00 %  
GRX28: 0.00 %  
GRX29: 0.00 %  
GRX30: 0.00 %  
GRX31: 0.00 %  
GRX32: 0.00 %  
GRX33: 0.00 %  
GRX34: 0.00 %  
GRX35: 0.00 %  
GRX36: 0.00 %  
GRX37: 0.00 %  
GRX38: 0.00 %  
GRX39: 0.00 %  
GRX40: 0.00 %  
GRX41: 0.00 %  
GRX42: 0.00 %  
GRX43: 0.00 %  
GRX44: 0.00 %  
GRX45: 0.00 %  
GRX46: 0.00 %  
GRX47: 0.00 %  
GRX48: 0.00 %  
GRX49: 0.00 %  
GRX50: 0.00 %  
GRX51: 0.00 %  
GRX52: 0.00 %  
GRX53: 0.00 %  
GRX54: 0.00 %  
GRX55: 0.00 %  
GRX56: 0.00 %  
GRX57: 0.00 %  
GRX58: 0.00 %  
GRX59: 0.00 %  
GRX60: 0.00 %  
GRX61: 0.00 %  
GRX62: 0.00 %  
GRX63: 0.00 %  
GRX64: 0.00 %  
GRX65: 0.00 %  
GRX66: 0.00 %  
GRX67: 0.00 %  
GRX68: 0.00 %  
GRX69: 0.00 %  
GRX70: 0.00 %  
GRX71: 0.00 %  
GRX72: 0.00 %  
GRX73: 0.00 %  
GRX74: 0.00 %  
GRX75: 0.00 %  
GRX76: 0.00 %  
GRX77: 0.00 %  
GRX78: 0.00 %  
GRX79: 0.00 %  
GRX80: 0.00 %  
GRX81: 0.00 %  
GRX82: 0.00 %  
GRX83: 0.00 %  
GRX84: 0.00 %  
GRX85: 0.00 %  
GRX86: 0.00 %  
GRX87: 0.00 %  
GRX88: 0.00 %  
GRX89: 0.00 %  
GRX90: 0.00 %  
GRX91: 0.00 %  
GRX92: 0.00 %  
GRX93: 0.00 %  
GRX94: 0.00 %  
GRX95: 0.00 %  
GRX96: 0.00 %  
GRX97: 0.00 %  
GRX98: 0.00 %  
GRX99: 0.00 %  
GRX100: 0.00 %

F2 - Processing parameters  
SI: 65536  
SF: 125.780392 MHz  
WDW: EM  
SSB: 0  
LB: 1.00 Hz  
GB: 0  
PC: 2.00

1D NMR plot parameters  
CX: 22.80 cm  
CY: 30.00 cm  
FIP: 220.000 ppm  
F1: 21671.89 Hz  
F2: -628.00 Hz  
FPCMCN: 9.86842 ppm/cm  
HCN: 1241.25391 Hz/cm

Current Data Parameters  
 USER schner  
 NAME ms1-140-3-2ben  
 EXPNO 1  
 PROCNO 1

F2 - Acquisition Parameters  
 Date\_ 20090218  
 Time 19:27  
 INSTRUM cryo500  
 PULPROG zgpg30  
 PREROG 5 mm CPFLC1 42  
 TD 81728  
 SOLVENT 6006  
 NS 12  
 DS 2  
 SWH 8012.820 Hz  
 FIDRES 0.098043 Hz  
 AQ 5.0998774 sec  
 RG 4.5  
 DW 62.400 usec  
 DE 6.00 usec  
 TE 298.0 K  
 MCRST 0.1000000 sec  
 MCRF2 0.0000000 sec  
 MCRK1 0.0150000 sec  
 ===== CHANNEL f1 =====  
 NUCL 1H  
 P1 7.50 usec  
 PL1 1.60 dB  
 SFO1 500.2235015 MHz

F2 - Processing parameters  
 SI 65536  
 SF 500.2200004 MHz  
 EQ  
 F2 0.30 Hz  
 GB 0  
 PC 4.00

1D NMR plot parameters  
 CX 22.80 cm  
 CY 15.00 cm  
 F1P 7.565 ppm  
 F1 3784.16 Hz  
 F2P 0.090 ppm  
 F2 44.85 Hz  
 PRCH 0.32787 ppm/cm  
 HZCX 164.00510 Hz/cm

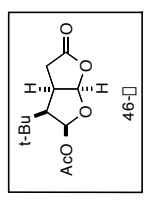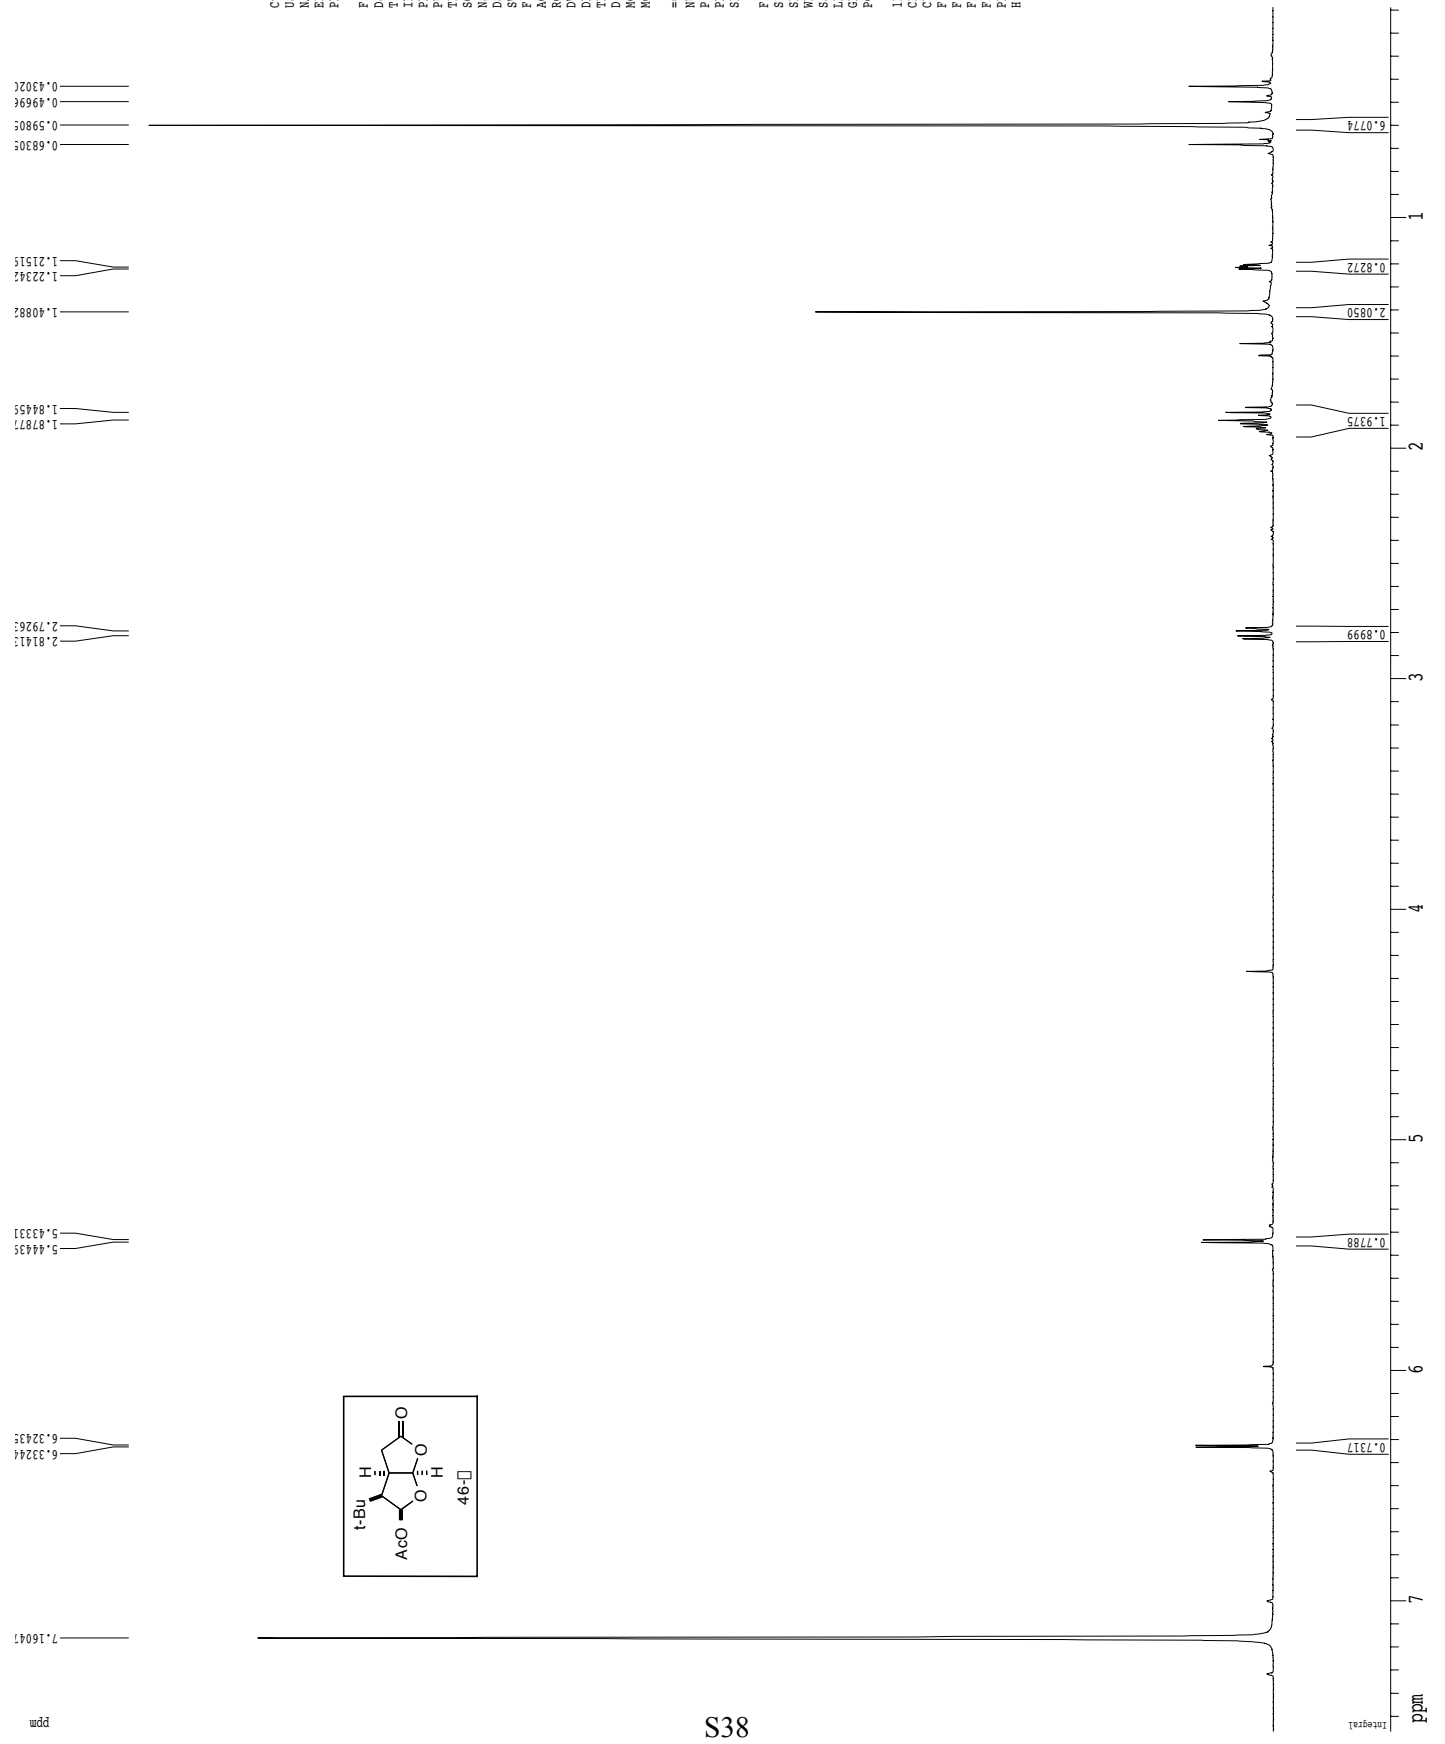

Z-restored spin-echo <sup>13</sup>C spectrum with <sup>1</sup>H decoupling

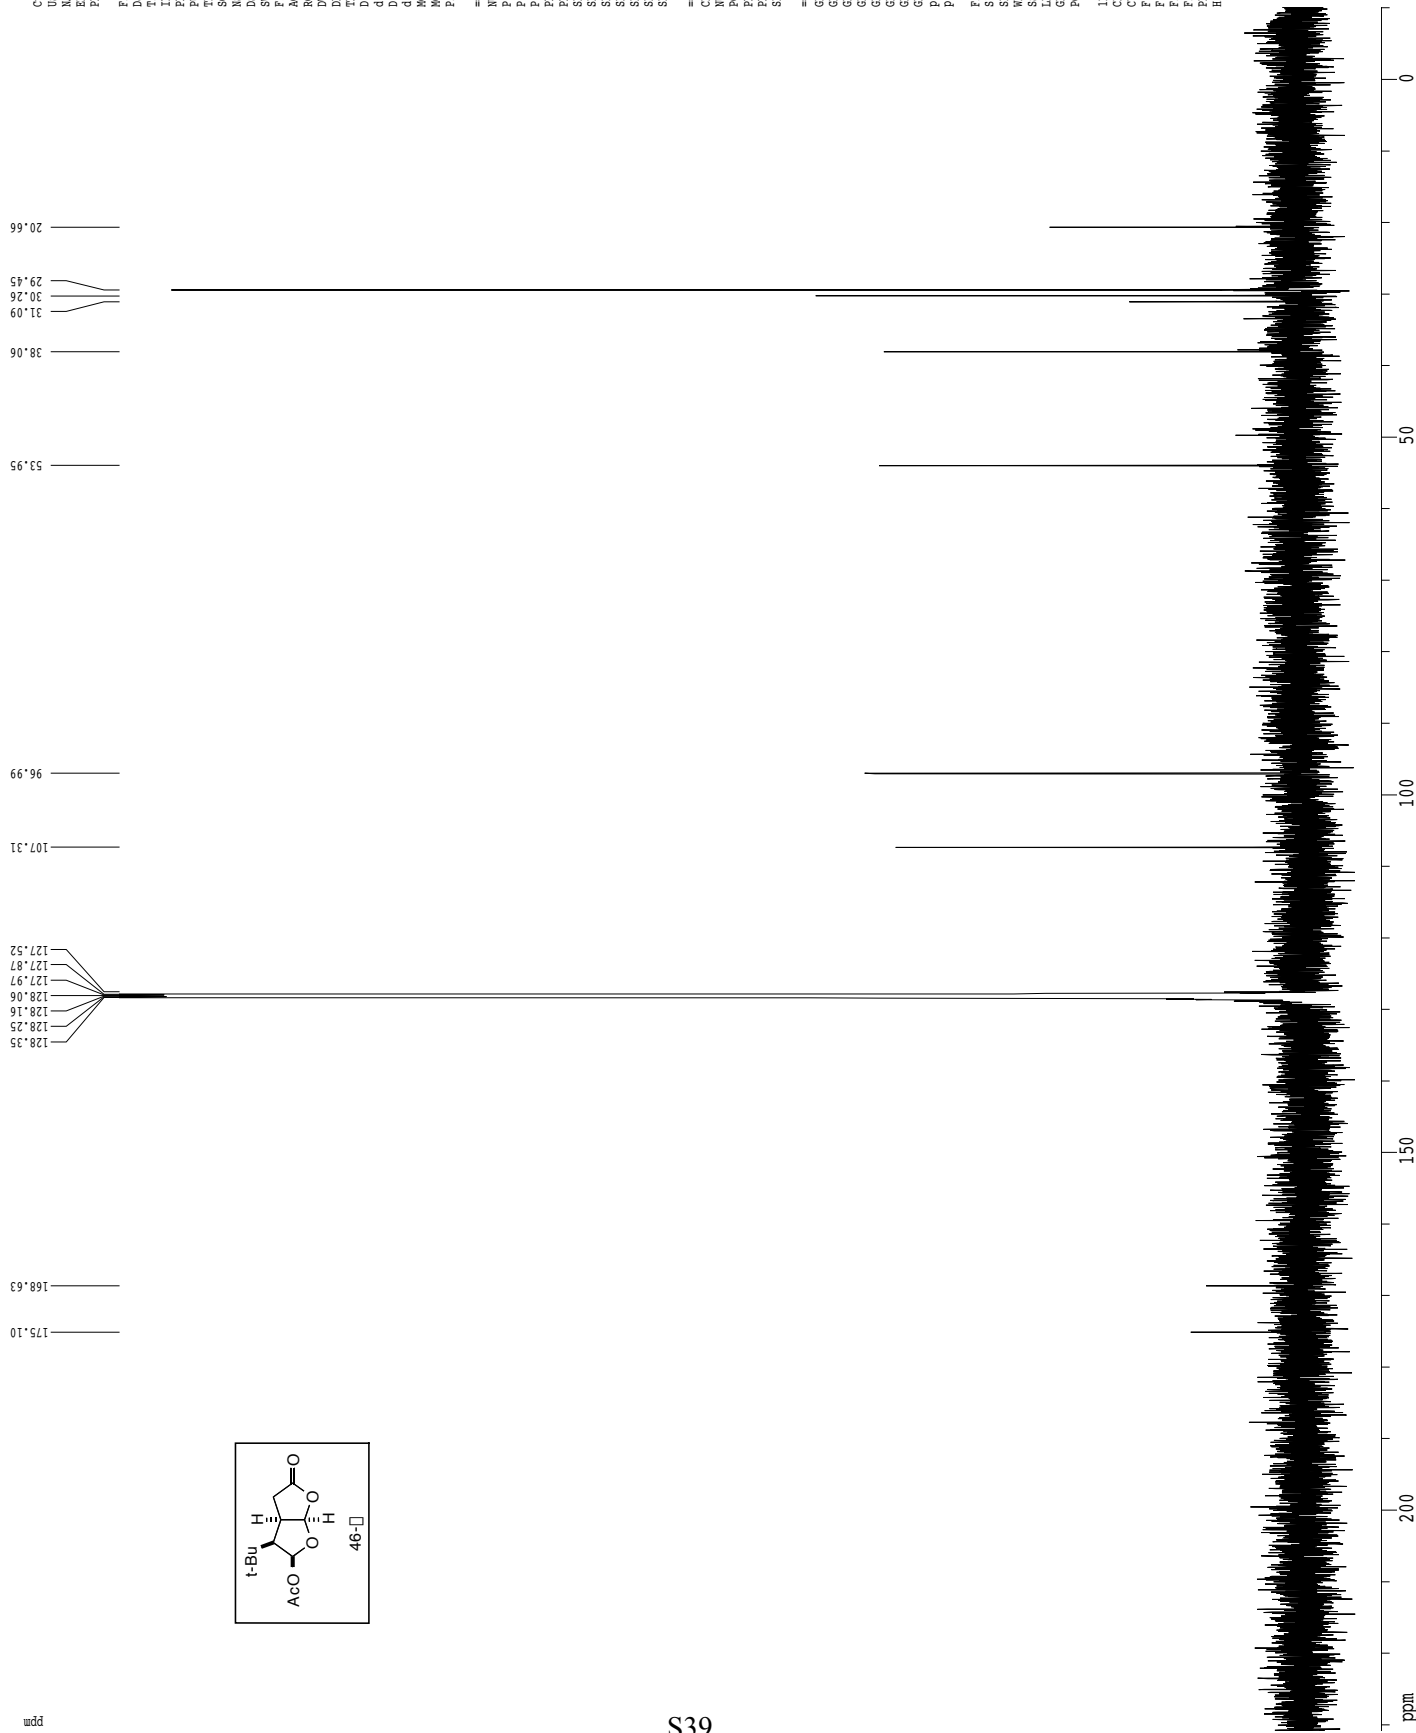

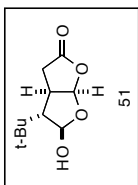

Current Data Parameters  
 USER gsuur  
 NAME NEG-I-072  
 EXPNO 1  
 PROCNO 1

F2 - Acquisition Parameters  
 Date\_ 20100803  
 Time 15.56  
 INSTRUM gn500  
 PROBDW 5 mm broadband  
 PULPROG zg30  
 TD 81728  
 SFO1 499.6234973 MHz  
 SOLVENT CDCl3  
 NS 8  
 DS 2  
 SWH 8012.820 Hz  
 FIDRES 0.098043 Hz  
 AQ 5.0998774 sec  
 RG 1024  
 DW 62.400 usec  
 DE 6.00 usec  
 TE 298.0 K  
 D1 0.10000000 sec  
 MCREST 0.00000000 sec  
 MCWRR 0.01500000 sec

==== CHANNEL f1 =====  
 NUC1 1H  
 P1 13.00 usec  
 PL1 -4.00 dB  
 SFO1 499.6234973 MHz

F2 - Processing parameters  
 SI 65536  
 SF 499.6200241 MHz  
 WDW EN  
 SSB 0  
 LB 0  
 GB 0  
 PC 1.00

LD NMR plot parameters  
 CX 22.80 cm  
 CY 10.00 cm  
 FIP 10.500 ppm  
 F1 52.46.01 Hz  
 F2P -0.500 ppm  
 F2 -249.81 Hz  
 PPMCN 0.48246 ppm/cm  
 HZCN 241.04475 Hz/cm

0.94466  
 0.95076  
 1.26156  
 1.97781  
 1.98181  
 2.17395  
 2.17216  
 2.81134  
 2.89330  
 2.92963  
 2.97976

5.57566  
 6.06273  
 6.07475  
 7.27007

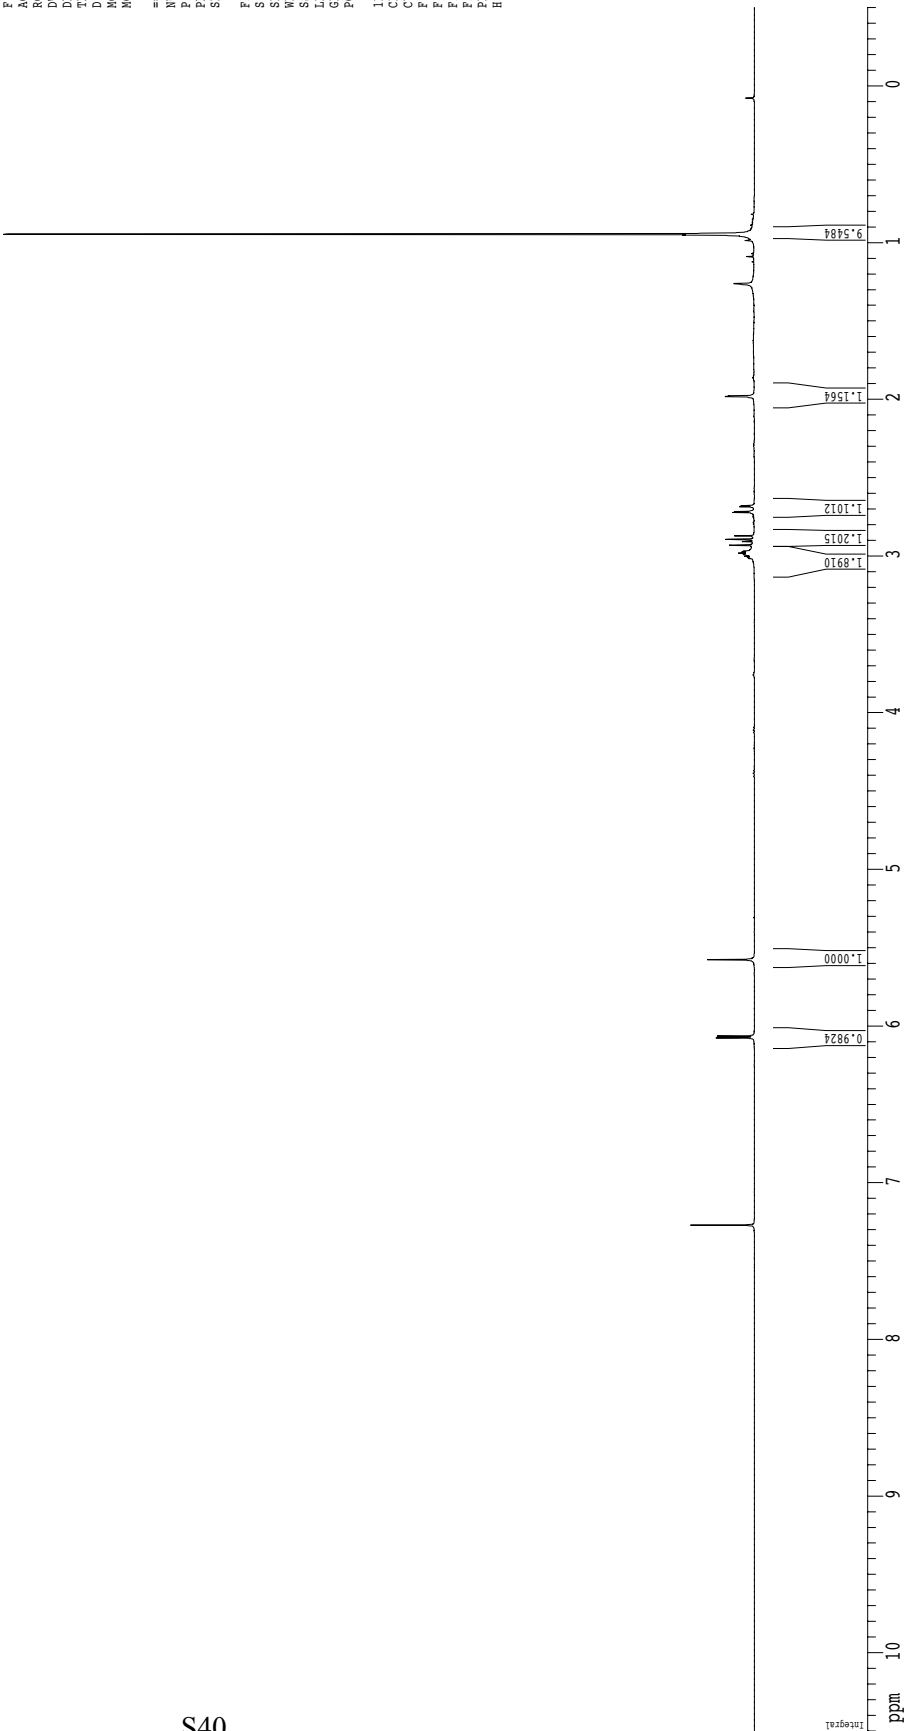



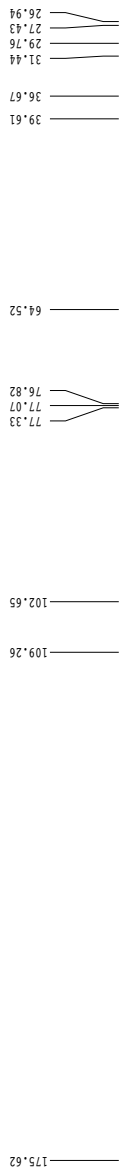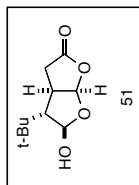

```

Current Data Parameters
USER          genuy
NAME         NEG-I-072
EXPNO        3
PROCNO       1

F2 - Acquisition Parameters
Date_        20100804
Time         8.04
INSTRUM      cryo500
PROBHD       5 mm CPYCI H-
PULPROG      SpineEcho3Dgpr-prd
TD            65536
SOLVENT      CDCl3
NS           16
DS           16
SWH           30303.031 Hz
FIDRES        0.462388 Hz
AQ            1.0813840 sec
RG            7296.2
DE            16.500 usec
TE            300.2 K
D1            0.25600000 sec
d11           0.03000000 sec
d16           0.00020000 sec
d17           0.00019600 sec
MCREST       0.00000000 sec
MCWRK        0.01500000 sec
F2           31.00 usec

===== CHANNEL f1 =====
NUC1          13C
P1            15.50 usec
PL1           500.00 usec
P12           2000.00 usec
PL2           120.00 dB
PL11          -1.00 dB
SFO1          125.7642348 MHz
SF1           3.20 dB
SFO2          0.00000000 MHz
SFO11         0.00000000 dB
SFO12         0.00000000 dB
SFO13         0.00000000 dB
SFO14         0.00000000 dB
SFO15         0.00000000 dB
SFO16         0.00000000 dB
SFO17         0.00000000 dB
SFO18         0.00000000 dB
SFO19         0.00000000 dB
SFO20         0.00000000 dB

===== CHANNEL f2 =====
CPDPRG2      waltz16
NUC2          1H
PCPD2        100.00 usec
PL22         1.50 dB
PL21         24.50 dB
SFO2          500.2225011 MHz

===== GRADIENT CHANNEL =====
GPRM1        SINE-100
GPRM2        SINE-100
GPRM3        0.00 %
GPRM4        0.00 %
GPRM5        0.00 %
GPRM6        0.00 %
GPRM7        0.00 %
GPRM8        0.00 %
GPRM9        30.00 %
GPRM10       50.00 %
p15          500.00 usec
p16          1000.00 usec

F2 - Processing parameters
SI            32768
SF            125.7642348 MHz
WDW           EM
SSB           0
LB            1.00 Hz
GB            0
PC            2.00

ID_NMR plot parameters
X1            175.62 ppm
X2            26.94 ppm
Y1            15.65 cm
Y2            15.65 cm
F1P           220.000 PPM
F1            27671.69 Hz
F2P           -5.000 PPM
F2            -628.90 Hz
PPHMM        9.86842 PPM/cm
HZCM         1241.25415 Hz/cm
    
```

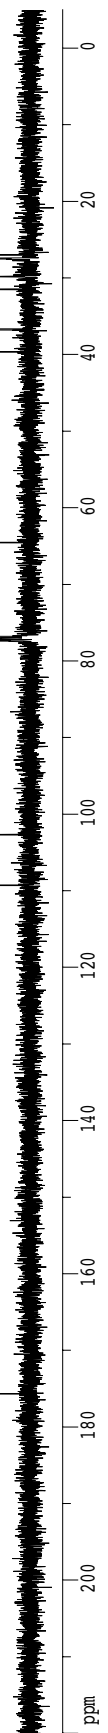



ppm

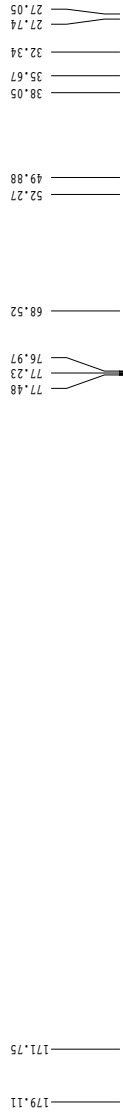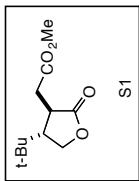

```

Current Data Parameters
USER          NEG-II-065A
NAME          NEG-II-065A
EXPNO        2
PROCNO       1

F2 - Acquisition Parameters
Date_        20110518
Time         20:27
INSTRUM      spect
PROBHD       5 mm CPVT 1H
PULPROG      zgpg30
SOLVENT      CDCl3
NS           295
DS           16
SWH          30003.031 Hz
AQ           0.462388 sec
RG           1.000000
WDW          EM
SS           16.500 usec
DE           6.00 usec
TE           298.0 K
D1           1.5000000 sec
D11          0.0300000 sec
D16          0.0020000 sec
DELTA        0.0035000 sec
WALTZ16      0.0000000 sec
WALTZ17      0.0000000 sec
WALTZ18      0.0000000 sec
WALTZ19      0.0000000 sec
WALTZ20      0.0000000 sec
WALTZ21      0.0000000 sec
WALTZ22      0.0000000 sec
WALTZ23      0.0000000 sec
WALTZ24      0.0000000 sec
WALTZ25      0.0000000 sec
WALTZ26      0.0000000 sec
WALTZ27      0.0000000 sec
WALTZ28      0.0000000 sec
WALTZ29      0.0000000 sec
WALTZ30      0.0000000 sec
WALTZ31      0.0000000 sec
WALTZ32      0.0000000 sec
WALTZ33      0.0000000 sec
WALTZ34      0.0000000 sec
WALTZ35      0.0000000 sec
WALTZ36      0.0000000 sec
WALTZ37      0.0000000 sec
WALTZ38      0.0000000 sec
WALTZ39      0.0000000 sec
WALTZ40      0.0000000 sec
WALTZ41      0.0000000 sec
WALTZ42      0.0000000 sec
WALTZ43      0.0000000 sec
WALTZ44      0.0000000 sec
WALTZ45      0.0000000 sec
WALTZ46      0.0000000 sec
WALTZ47      0.0000000 sec
WALTZ48      0.0000000 sec
WALTZ49      0.0000000 sec
WALTZ50      0.0000000 sec
WALTZ51      0.0000000 sec
WALTZ52      0.0000000 sec
WALTZ53      0.0000000 sec
WALTZ54      0.0000000 sec
WALTZ55      0.0000000 sec
WALTZ56      0.0000000 sec
WALTZ57      0.0000000 sec
WALTZ58      0.0000000 sec
WALTZ59      0.0000000 sec
WALTZ60      0.0000000 sec
WALTZ61      0.0000000 sec
WALTZ62      0.0000000 sec
WALTZ63      0.0000000 sec
WALTZ64      0.0000000 sec
WALTZ65      0.0000000 sec
WALTZ66      0.0000000 sec
WALTZ67      0.0000000 sec
WALTZ68      0.0000000 sec
WALTZ69      0.0000000 sec
WALTZ70      0.0000000 sec
WALTZ71      0.0000000 sec
WALTZ72      0.0000000 sec
WALTZ73      0.0000000 sec
WALTZ74      0.0000000 sec
WALTZ75      0.0000000 sec
WALTZ76      0.0000000 sec
WALTZ77      0.0000000 sec
WALTZ78      0.0000000 sec
WALTZ79      0.0000000 sec
WALTZ80      0.0000000 sec
WALTZ81      0.0000000 sec
WALTZ82      0.0000000 sec
WALTZ83      0.0000000 sec
WALTZ84      0.0000000 sec
WALTZ85      0.0000000 sec
WALTZ86      0.0000000 sec
WALTZ87      0.0000000 sec
WALTZ88      0.0000000 sec
WALTZ89      0.0000000 sec
WALTZ90      0.0000000 sec
WALTZ91      0.0000000 sec
WALTZ92      0.0000000 sec
WALTZ93      0.0000000 sec
WALTZ94      0.0000000 sec
WALTZ95      0.0000000 sec
WALTZ96      0.0000000 sec
WALTZ97      0.0000000 sec
WALTZ98      0.0000000 sec
WALTZ99      0.0000000 sec
WALTZ100     0.0000000 sec

===== CHANNEL F1 =====
NUC1         13C
P1           15.50 usec
F1           500.00 usec
P2           200.00 usec
F2           125.764548 MHz
PCPD2        1.00 dB
PFL1         1.00 dB
SF01         125.764548 MHz
SF1          3.20 dB
SF2          3.20 dB
SFO1         Cpp60.0.5, 20.1
SFO2         Cpp60comp.4
SFO3         0.00 Hz
SFO4         0.00 Hz
SFO5         0.00 Hz
SFO6         0.00 Hz
SFO7         0.00 Hz
SFO8         0.00 Hz
SFO9         0.00 Hz
SFO10        0.00 Hz
SFO11        0.00 Hz
SFO12        0.00 Hz
SFO13        0.00 Hz
SFO14        0.00 Hz
SFO15        0.00 Hz
SFO16        0.00 Hz
SFO17        0.00 Hz
SFO18        0.00 Hz
SFO19        0.00 Hz
SFO20        0.00 Hz
SFO21        0.00 Hz
SFO22        0.00 Hz
SFO23        0.00 Hz
SFO24        0.00 Hz
SFO25        0.00 Hz
SFO26        0.00 Hz
SFO27        0.00 Hz
SFO28        0.00 Hz
SFO29        0.00 Hz
SFO30        0.00 Hz
SFO31        0.00 Hz
SFO32        0.00 Hz
SFO33        0.00 Hz
SFO34        0.00 Hz
SFO35        0.00 Hz
SFO36        0.00 Hz
SFO37        0.00 Hz
SFO38        0.00 Hz
SFO39        0.00 Hz
SFO40        0.00 Hz
SFO41        0.00 Hz
SFO42        0.00 Hz
SFO43        0.00 Hz
SFO44        0.00 Hz
SFO45        0.00 Hz
SFO46        0.00 Hz
SFO47        0.00 Hz
SFO48        0.00 Hz
SFO49        0.00 Hz
SFO50        0.00 Hz
SFO51        0.00 Hz
SFO52        0.00 Hz
SFO53        0.00 Hz
SFO54        0.00 Hz
SFO55        0.00 Hz
SFO56        0.00 Hz
SFO57        0.00 Hz
SFO58        0.00 Hz
SFO59        0.00 Hz
SFO60        0.00 Hz
SFO61        0.00 Hz
SFO62        0.00 Hz
SFO63        0.00 Hz
SFO64        0.00 Hz
SFO65        0.00 Hz
SFO66        0.00 Hz
SFO67        0.00 Hz
SFO68        0.00 Hz
SFO69        0.00 Hz
SFO70        0.00 Hz
SFO71        0.00 Hz
SFO72        0.00 Hz
SFO73        0.00 Hz
SFO74        0.00 Hz
SFO75        0.00 Hz
SFO76        0.00 Hz
SFO77        0.00 Hz
SFO78        0.00 Hz
SFO79        0.00 Hz
SFO80        0.00 Hz
SFO81        0.00 Hz
SFO82        0.00 Hz
SFO83        0.00 Hz
SFO84        0.00 Hz
SFO85        0.00 Hz
SFO86        0.00 Hz
SFO87        0.00 Hz
SFO88        0.00 Hz
SFO89        0.00 Hz
SFO90        0.00 Hz
SFO91        0.00 Hz
SFO92        0.00 Hz
SFO93        0.00 Hz
SFO94        0.00 Hz
SFO95        0.00 Hz
SFO96        0.00 Hz
SFO97        0.00 Hz
SFO98        0.00 Hz
SFO99        0.00 Hz
SFO100       0.00 Hz

===== CHANNEL F2 =====
CPDPRG2      waltz16
NUC2         1H
P2           100.00 usec
F2           400.00 MHz
PCPD2        1.60 dB
PFL2         1.60 dB
SF02         500.2225011 MHz
SF1          3.20 dB
SF2          3.20 dB
SFO1         Cpp60.0.5, 20.1
SFO2         Cpp60comp.4
SFO3         0.00 Hz
SFO4         0.00 Hz
SFO5         0.00 Hz
SFO6         0.00 Hz
SFO7         0.00 Hz
SFO8         0.00 Hz
SFO9         0.00 Hz
SFO10        0.00 Hz
SFO11        0.00 Hz
SFO12        0.00 Hz
SFO13        0.00 Hz
SFO14        0.00 Hz
SFO15        0.00 Hz
SFO16        0.00 Hz
SFO17        0.00 Hz
SFO18        0.00 Hz
SFO19        0.00 Hz
SFO20        0.00 Hz
SFO21        0.00 Hz
SFO22        0.00 Hz
SFO23        0.00 Hz
SFO24        0.00 Hz
SFO25        0.00 Hz
SFO26        0.00 Hz
SFO27        0.00 Hz
SFO28        0.00 Hz
SFO29        0.00 Hz
SFO30        0.00 Hz
SFO31        0.00 Hz
SFO32        0.00 Hz
SFO33        0.00 Hz
SFO34        0.00 Hz
SFO35        0.00 Hz
SFO36        0.00 Hz
SFO37        0.00 Hz
SFO38        0.00 Hz
SFO39        0.00 Hz
SFO40        0.00 Hz
SFO41        0.00 Hz
SFO42        0.00 Hz
SFO43        0.00 Hz
SFO44        0.00 Hz
SFO45        0.00 Hz
SFO46        0.00 Hz
SFO47        0.00 Hz
SFO48        0.00 Hz
SFO49        0.00 Hz
SFO50        0.00 Hz
SFO51        0.00 Hz
SFO52        0.00 Hz
SFO53        0.00 Hz
SFO54        0.00 Hz
SFO55        0.00 Hz
SFO56        0.00 Hz
SFO57        0.00 Hz
SFO58        0.00 Hz
SFO59        0.00 Hz
SFO60        0.00 Hz
SFO61        0.00 Hz
SFO62        0.00 Hz
SFO63        0.00 Hz
SFO64        0.00 Hz
SFO65        0.00 Hz
SFO66        0.00 Hz
SFO67        0.00 Hz
SFO68        0.00 Hz
SFO69        0.00 Hz
SFO70        0.00 Hz
SFO71        0.00 Hz
SFO72        0.00 Hz
SFO73        0.00 Hz
SFO74        0.00 Hz
SFO75        0.00 Hz
SFO76        0.00 Hz
SFO77        0.00 Hz
SFO78        0.00 Hz
SFO79        0.00 Hz
SFO80        0.00 Hz
SFO81        0.00 Hz
SFO82        0.00 Hz
SFO83        0.00 Hz
SFO84        0.00 Hz
SFO85        0.00 Hz
SFO86        0.00 Hz
SFO87        0.00 Hz
SFO88        0.00 Hz
SFO89        0.00 Hz
SFO90        0.00 Hz
SFO91        0.00 Hz
SFO92        0.00 Hz
SFO93        0.00 Hz
SFO94        0.00 Hz
SFO95        0.00 Hz
SFO96        0.00 Hz
SFO97        0.00 Hz
SFO98        0.00 Hz
SFO99        0.00 Hz
SFO100       0.00 Hz

===== GRADIENT CHANNEL =====
GRNAM1       SINE.100
GRNAM2       SINE.100
GRX1         0.00 %
GRX2         0.00 %
GRX3         0.00 %
GRX4         0.00 %
GRX5         0.00 %
GRX6         0.00 %
GRX7         0.00 %
GRX8         0.00 %
GRX9         0.00 %
GRX10        0.00 %
GRX11        0.00 %
GRX12        0.00 %
GRX13        0.00 %
GRX14        0.00 %
GRX15        0.00 %
GRX16        0.00 %
GRX17        0.00 %
GRX18        0.00 %
GRX19        0.00 %
GRX20        0.00 %
GRX21        0.00 %
GRX22        0.00 %
GRX23        0.00 %
GRX24        0.00 %
GRX25        0.00 %
GRX26        0.00 %
GRX27        0.00 %
GRX28        0.00 %
GRX29        0.00 %
GRX30        0.00 %
GRX31        0.00 %
GRX32        0.00 %
GRX33        0.00 %
GRX34        0.00 %
GRX35        0.00 %
GRX36        0.00 %
GRX37        0.00 %
GRX38        0.00 %
GRX39        0.00 %
GRX40        0.00 %
GRX41        0.00 %
GRX42        0.00 %
GRX43        0.00 %
GRX44        0.00 %
GRX45        0.00 %
GRX46        0.00 %
GRX47        0.00 %
GRX48        0.00 %
GRX49        0.00 %
GRX50        0.00 %
GRX51        0.00 %
GRX52        0.00 %
GRX53        0.00 %
GRX54        0.00 %
GRX55        0.00 %
GRX56        0.00 %
GRX57        0.00 %
GRX58        0.00 %
GRX59        0.00 %
GRX60        0.00 %
GRX61        0.00 %
GRX62        0.00 %
GRX63        0.00 %
GRX64        0.00 %
GRX65        0.00 %
GRX66        0.00 %
GRX67        0.00 %
GRX68        0.00 %
GRX69        0.00 %
GRX70        0.00 %
GRX71        0.00 %
GRX72        0.00 %
GRX73        0.00 %
GRX74        0.00 %
GRX75        0.00 %
GRX76        0.00 %
GRX77        0.00 %
GRX78        0.00 %
GRX79        0.00 %
GRX80        0.00 %
GRX81        0.00 %
GRX82        0.00 %
GRX83        0.00 %
GRX84        0.00 %
GRX85        0.00 %
GRX86        0.00 %
GRX87        0.00 %
GRX88        0.00 %
GRX89        0.00 %
GRX90        0.00 %
GRX91        0.00 %
GRX92        0.00 %
GRX93        0.00 %
GRX94        0.00 %
GRX95        0.00 %
GRX96        0.00 %
GRX97        0.00 %
GRX98        0.00 %
GRX99        0.00 %
GRX100       0.00 %

F2 - Processing parameters
SI           65536
SF           125.780397 MHz
WDW          EM
SS           0
SB           0
GB           0
PC           2.00

1D NMR plot parameters
CX           22.80 cm
CY           40.00 cm
FIP         230.637 ppm
F2          29005.88 Hz
F2          -1293.96 ppm
F2PCMCN    10.56688 ppm/cm
HECN        1329.10693 Hz/cm
  
```

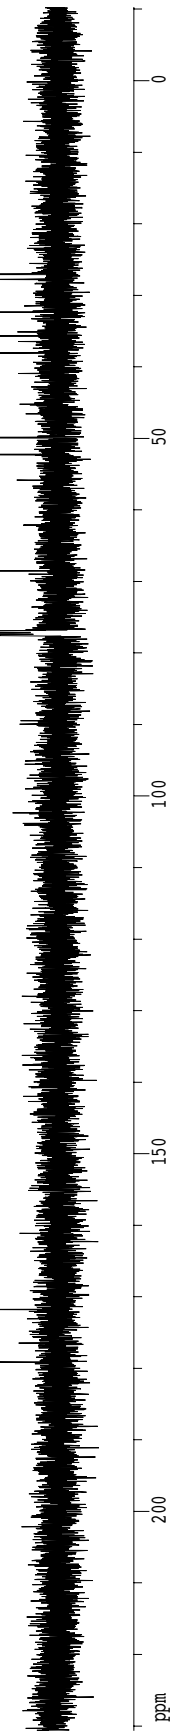

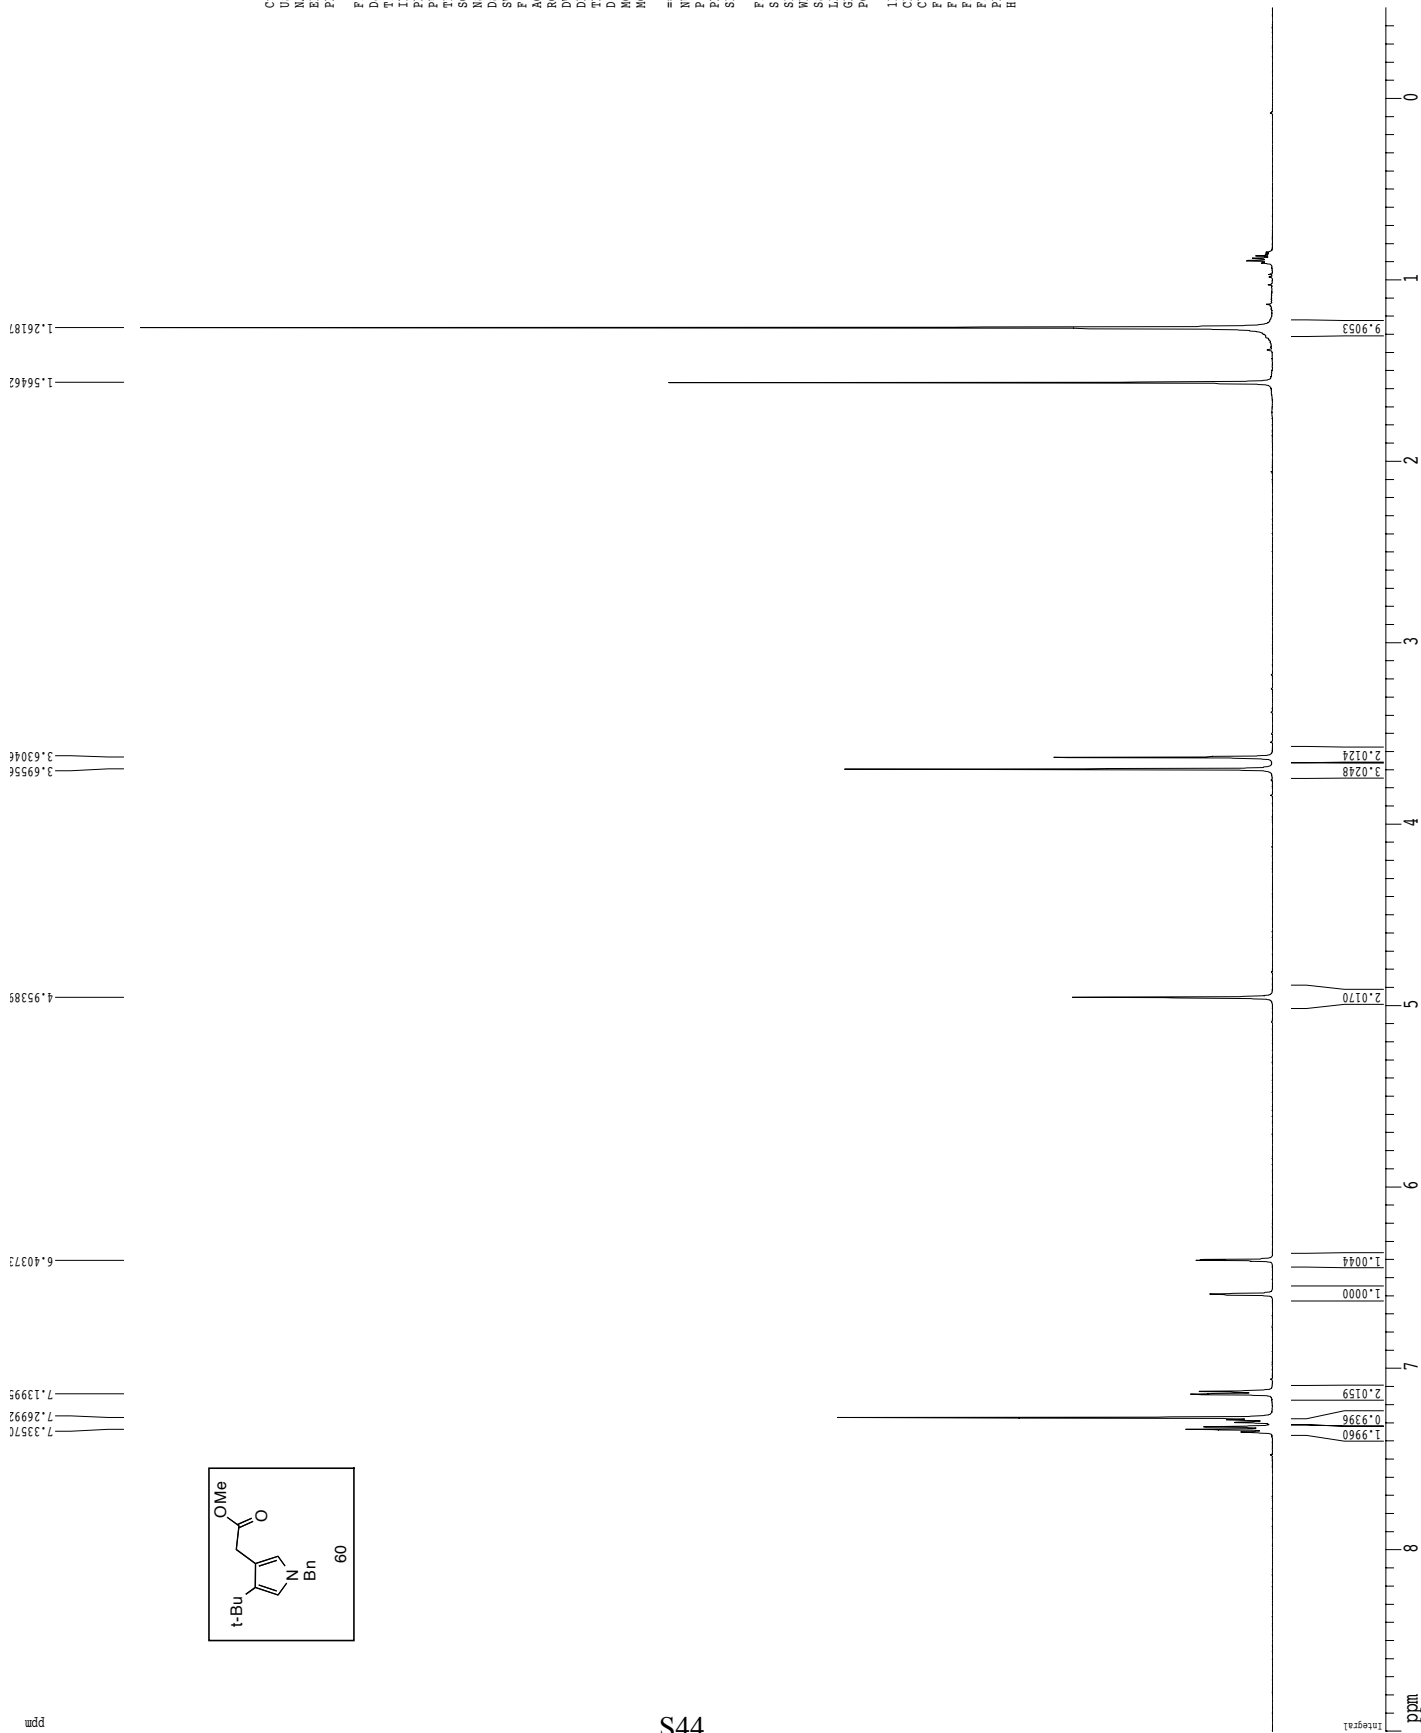

Current Data Parameters  
 USER gemung  
 SAMPLE NEG-II-034a  
 EXPTNO 1  
 PROCNO 1  
 F2 - Acquisition Parameters  
 Date 20110405  
 Time 19.09  
 INSTRUM cryo500  
 PROHDH 5 mm CPXI 1H-  
 PULPROG zg30  
 TD 81728  
 SOLVENT CDCl3  
 NS 8  
 DS 2  
 FWHZ 8012.82 Hz  
 AQ 0.109623 Hz  
 RG 5.0398774 sec  
 DW 62.400 usec  
 DE 6.00 usec  
 TE 298.0 K  
 D1 0.10000000 sec  
 MCREST 0.00000000 sec  
 MCWRR 0.01500000 sec  
 ===== CHANNEL f1 =====  
 NUC1 1H  
 P1 7.50 usec  
 PL1 0.00 dB  
 SFO1 500.223015 MHz  
 F2 - Processing parameters  
 SI 65536  
 SF 500.220251 MHz  
 WDW EM  
 SSB 0  
 LB 0.30 Hz  
 GB 0  
 PC 4.00  
 ID NMR plot parameters  
 CX 22.00 cm  
 CY 15.00 cm  
 F1 9.000 ppm  
 F2 4501.98 Hz  
 F3 -0.500 ppm  
 F4 -250.11 Hz  
 PRMCH 0.41667 ppm/cm  
 HZCM 208.42502 Hz/cm

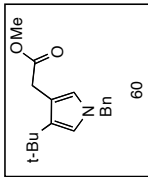

ppm

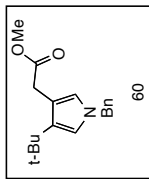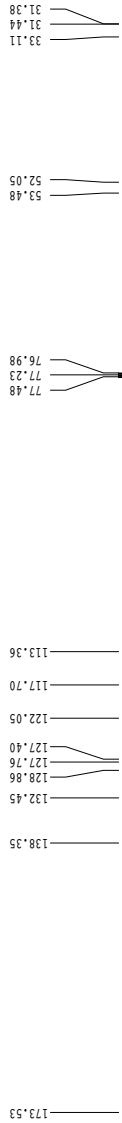

Current Data Parameters  
 USER NEG-II-034a  
 NAME NEG-II-034a  
 EXPNO 2  
 PROCNO 1

F2 - Acquisition Parameters  
 Date\_ 20110405  
 Time 19:21  
 CPU 10  
 PROBHD 5 mm CPYCI 1H  
 PULPROG zgpg30  
 TD 65536  
 SOLVENT CDCl3  
 NS 823  
 DS 16  
 SWH 3033.031 Hz  
 FIDRES 0.462388 Hz  
 AQ 1.90758 sec  
 RG 72.98  
 DW 16.500 usec  
 DE 6.00 usec  
 TE 298.0 K  
 D1 1.5000000 sec  
 d11 0.0300000 sec  
 D16 0.0020000 sec  
 T1 0.0030000 sec  
 T1RHO 0.0000000 sec  
 WALTZ16 0.0000000 sec  
 MCKR 0.0180000 sec  
 P2 31.00 usec

===== CHANNEL f1 =====  
 NUC1 13C  
 P1 15.50 usec  
 F1 500.00 usec  
 F2 200.00 usec  
 F3 100.00 usec  
 F4 1.00 dB  
 F5 1.00 dB  
 SF01 125.7942548 MHz  
 SF1 3.20 dB  
 SF2 3.20 dB  
 SFO1 Cyp60 0.5, 20.1  
 SFO2 Cyp60comp.4  
 SFO3 0.00 Hz  
 SFO4 0.00 Hz  
 SFO5 0.00 Hz

===== CHANNEL f2 =====  
 CDPGR2 wal-t216  
 NUC2 1H  
 PCPD2 100.00 usec  
 PL2 1.60 dB  
 PL3 24.60 dB  
 SF02 500.2225011 MHz

===== GRADIENT CHANNEL =====  
 GRAM1 SINE 100  
 GRAM2 SINE 100  
 GPC1 0.00 %  
 GPC2 0.00 %  
 GPC3 0.00 %  
 GPC4 0.00 %  
 GPC5 0.00 %  
 GPC6 0.00 %  
 GPC7 0.00 %  
 GPC8 0.00 %  
 GPC9 0.00 %  
 GPC10 0.00 %  
 GPC11 0.00 %  
 GPC12 0.00 %  
 GPC13 0.00 %  
 GPC14 0.00 %  
 GPC15 0.00 %  
 GPC16 100.00 usec

F2 - Processing parameters  
 SI 65536  
 SF 122.7803983 MHz  
 WDW EM  
 SSB 0  
 GB 1.00 Hz  
 PC 2.00

1D NMR plot parameters  
 CX 22.80 cm  
 CY 50.00 cm  
 FIP 220.000 ppm  
 F2 2767.89 Hz  
 F2 62.80 Hz  
 F2 9.86842 ppm/cm  
 FPCMCN 9.86842 ppm/cm  
 HCCK 1241.25391 Hz/cm

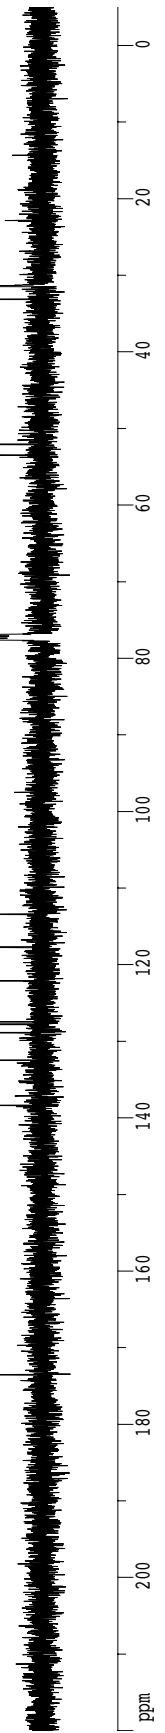

<sup>1</sup>H spectrum

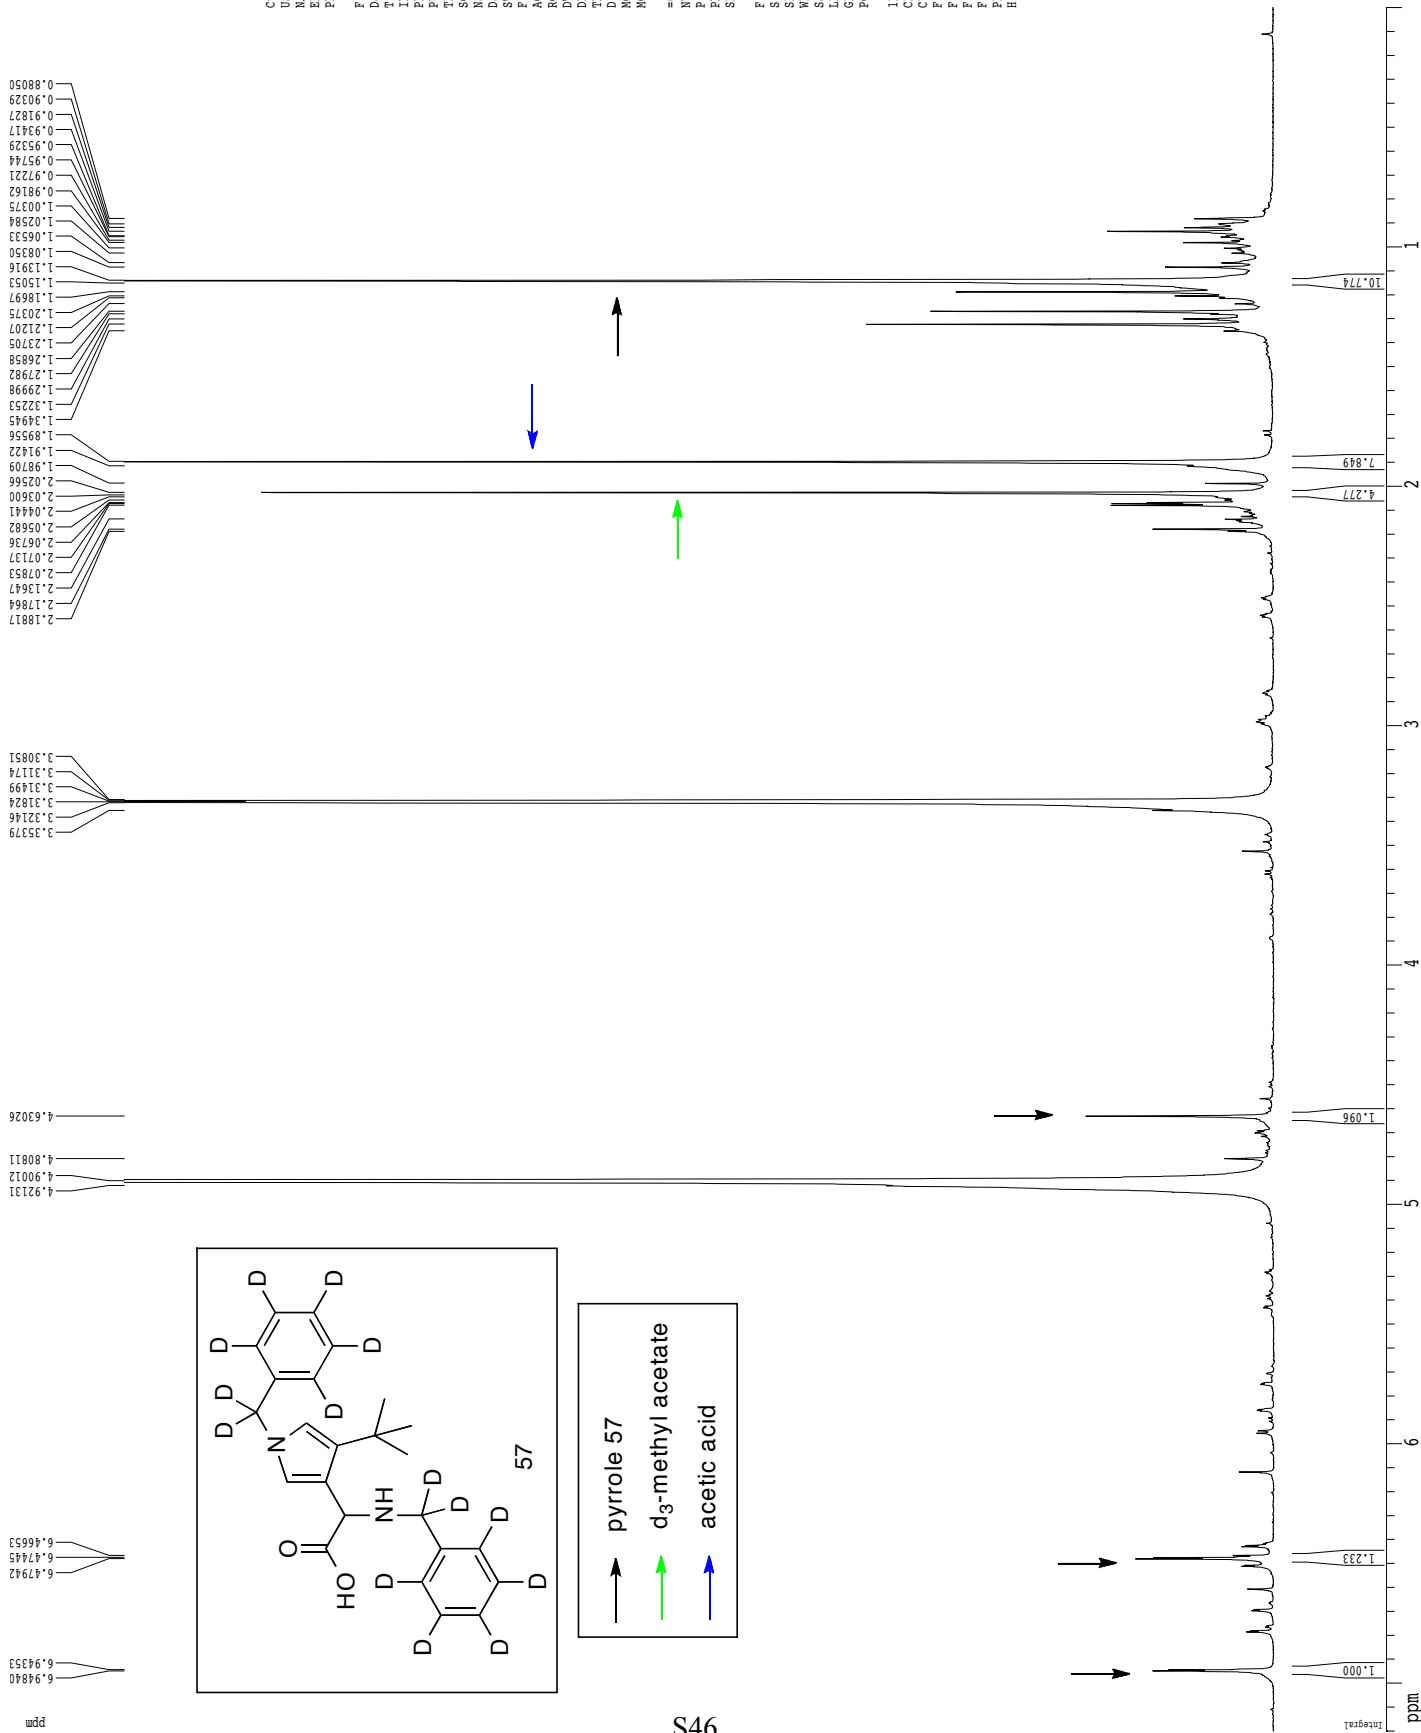

Current Data Parameters  
 USER untied  
 NAME NLU-02-194  
 EXPNO 1  
 PROCNO 1

F2 - Acquisition Parameters  
 Date\_ 20110603  
 Time\_ 0.37  
 INSTRUM crys500  
 PROBRD 5 mm CPXI 1H-  
 PULPROG zg30  
 TD 81728  
 SOLVENT MeOH  
 NS 32  
 DS 2  
 SWH 8012.820 Hz  
 FIDRES 0.098043 Hz  
 AQ 5.0998774 sec  
 RG 673  
 DE 6.00 usec  
 DR 288.0 K  
 TE 0.1000000 sec  
 D1 0.0000000 sec  
 MCREST 0.0000000 sec  
 MCWRR 0.0150000 sec

==== CHANNEL f1 =====  
 NUC1 1H  
 P1 7.50 usec  
 PL1 1.00 dB  
 SFO1 500.2235015 MHz

F2 - Processing parameters  
 SI 65535  
 SF 500.220117 MHz  
 GSS 0  
 WDW EM  
 SSB 0  
 LB 0.30 Hz  
 GB 0  
 PC 4.00

1D NMR plot parameters  
 CX 22.80 cm  
 CY 50.00 cm  
 FIP 7.200 ppm  
 F2 3901.38 Hz  
 F3 0.00 ppm  
 F4 0.00 ppm  
 PRMCN 0.31579 ppm/cm  
 HZCN 157.96422 Hz/cm



<sup>1</sup>H spectrum

ppm

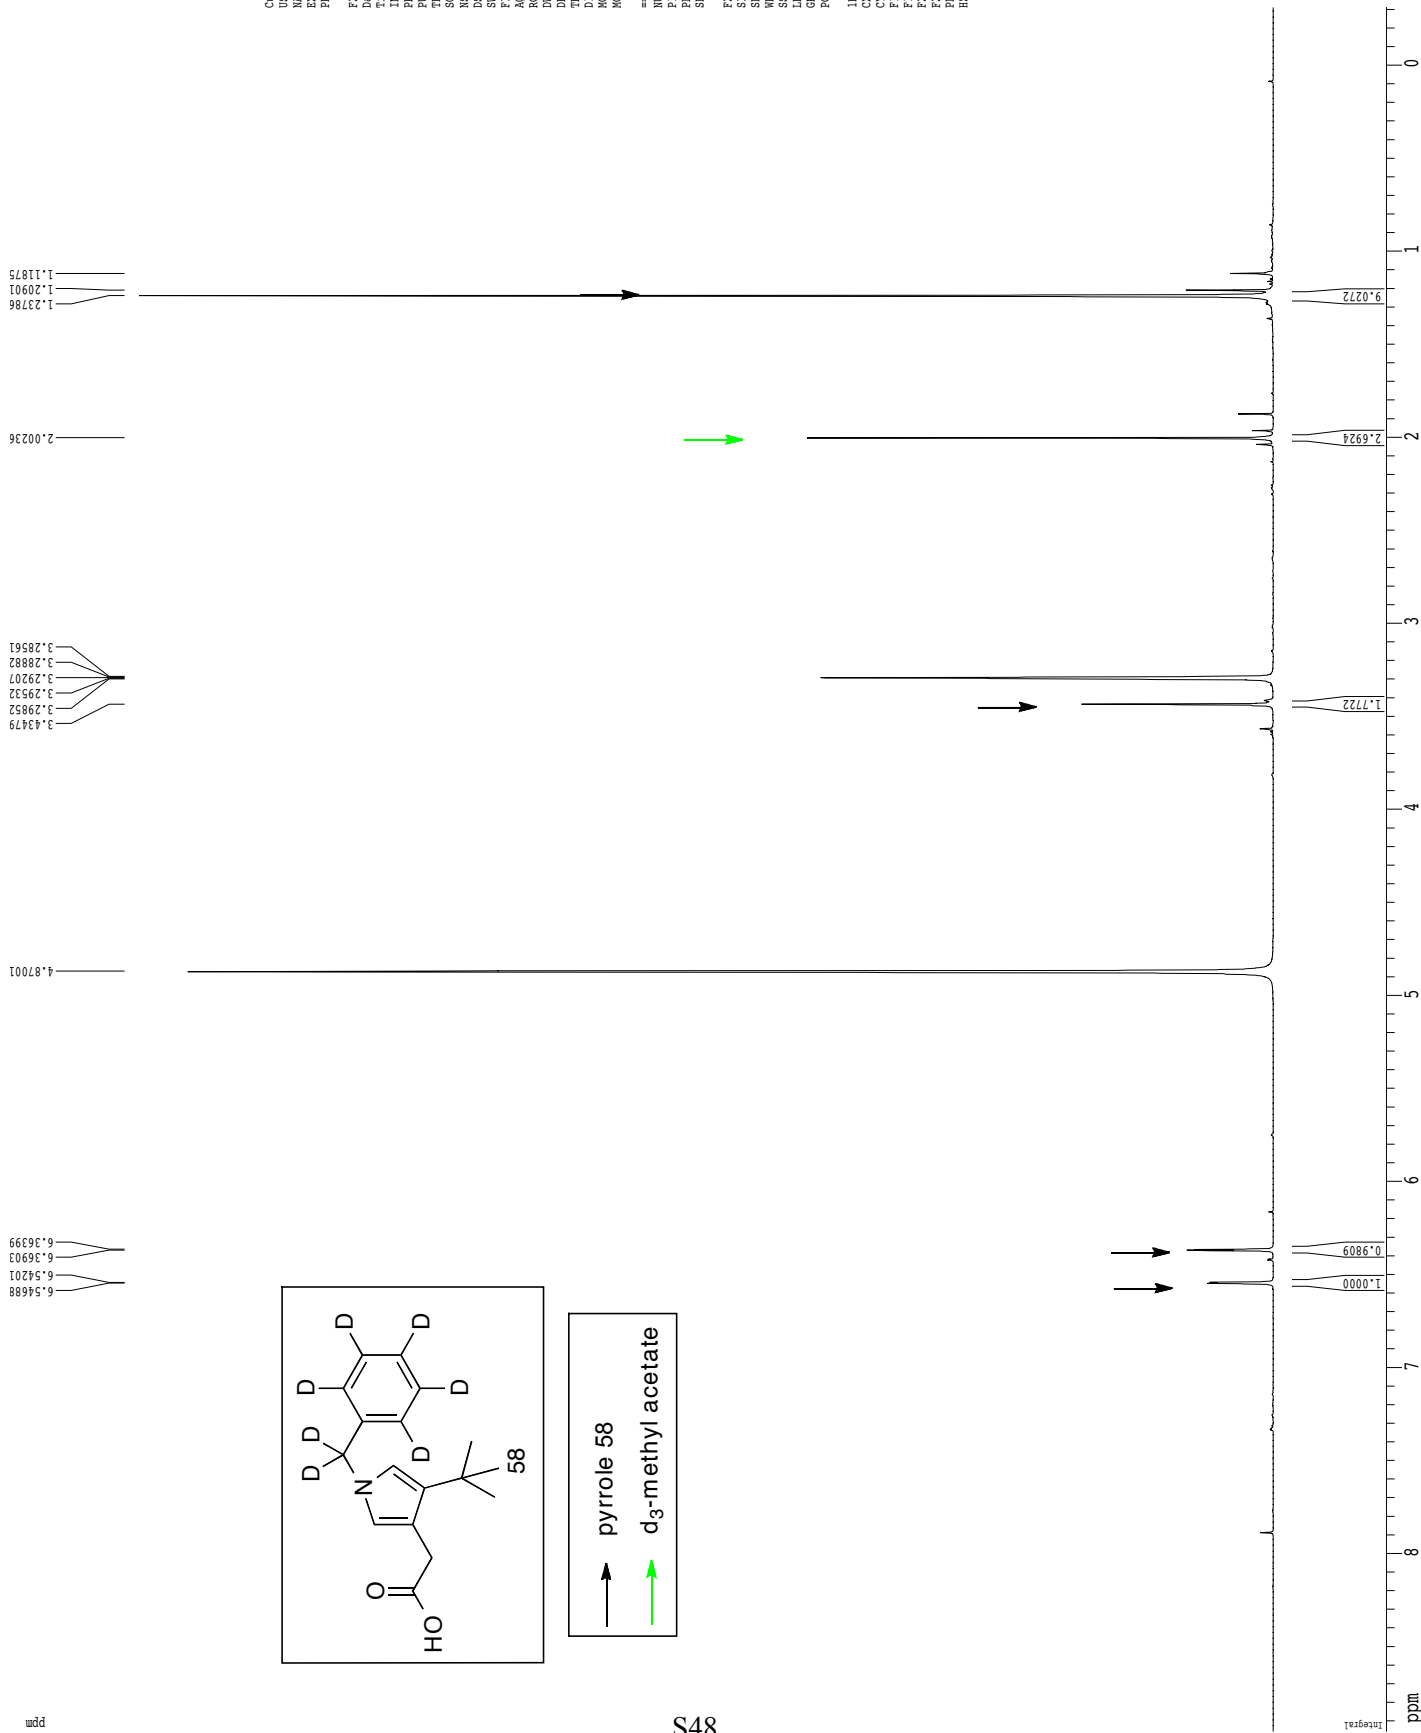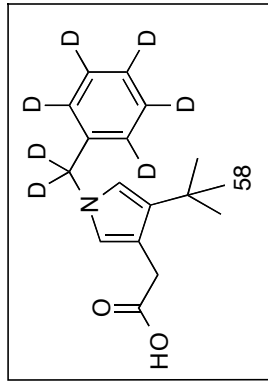

pyrrole 58  
d<sub>3</sub>-methyl acetate

Current Data Parameters  
 USER untitled  
 NAME NDU-02-193-HBDC10Hz  
 PWD 2  
 PROCNO 1  
 F2 - Acquisition Parameters  
 Date\_ 20110601  
 Time 21.37  
 INSTRUM crys300  
 PROBHD 5 mm CPCL1 H-1  
 PULPROG zgpg30  
 TD 81728  
 SOLVENT CDCl3  
 NS 32  
 DS 2  
 SFR 8012.820 Hz  
 FIDRES 0.098043 Hz  
 AQ 5.059918 sec  
 RG 71.8  
 DW 62.400 usec  
 DE 6.00 usec  
 TE 298.2 K  
 D1 0.1000000 sec  
 ACQRES 0.0000000 sec  
 ACPRK 0.0150000 sec  
 ===== CHANNEL f1 =====  
 NUC1 1H  
 P1 7.50 usec  
 PL1 1.60 dB  
 SFO1 500.225015 MHz  
 F2 - Processing parameters  
 SI 65536  
 SF 500.2200233 MHz  
 MDW EM  
 SSB 0  
 LB 0.30 Hz  
 GB 0  
 PC 4.00  
 ID NMR plot parameters  
 CX 22.80 cm  
 CY 15.00 cm  
 FIP 8.855 ppm  
 F1 4479.51 Hz  
 FZP -0.309 ppm  
 SFC 3.46 Hz  
 BEPCW 0.40632 Hz/cm  
 BECKM 203.25317 Hz/cm

Integrat

ppm



Z-restored spin-echo <sup>13</sup>C spectrum with <sup>1</sup>H decoupling

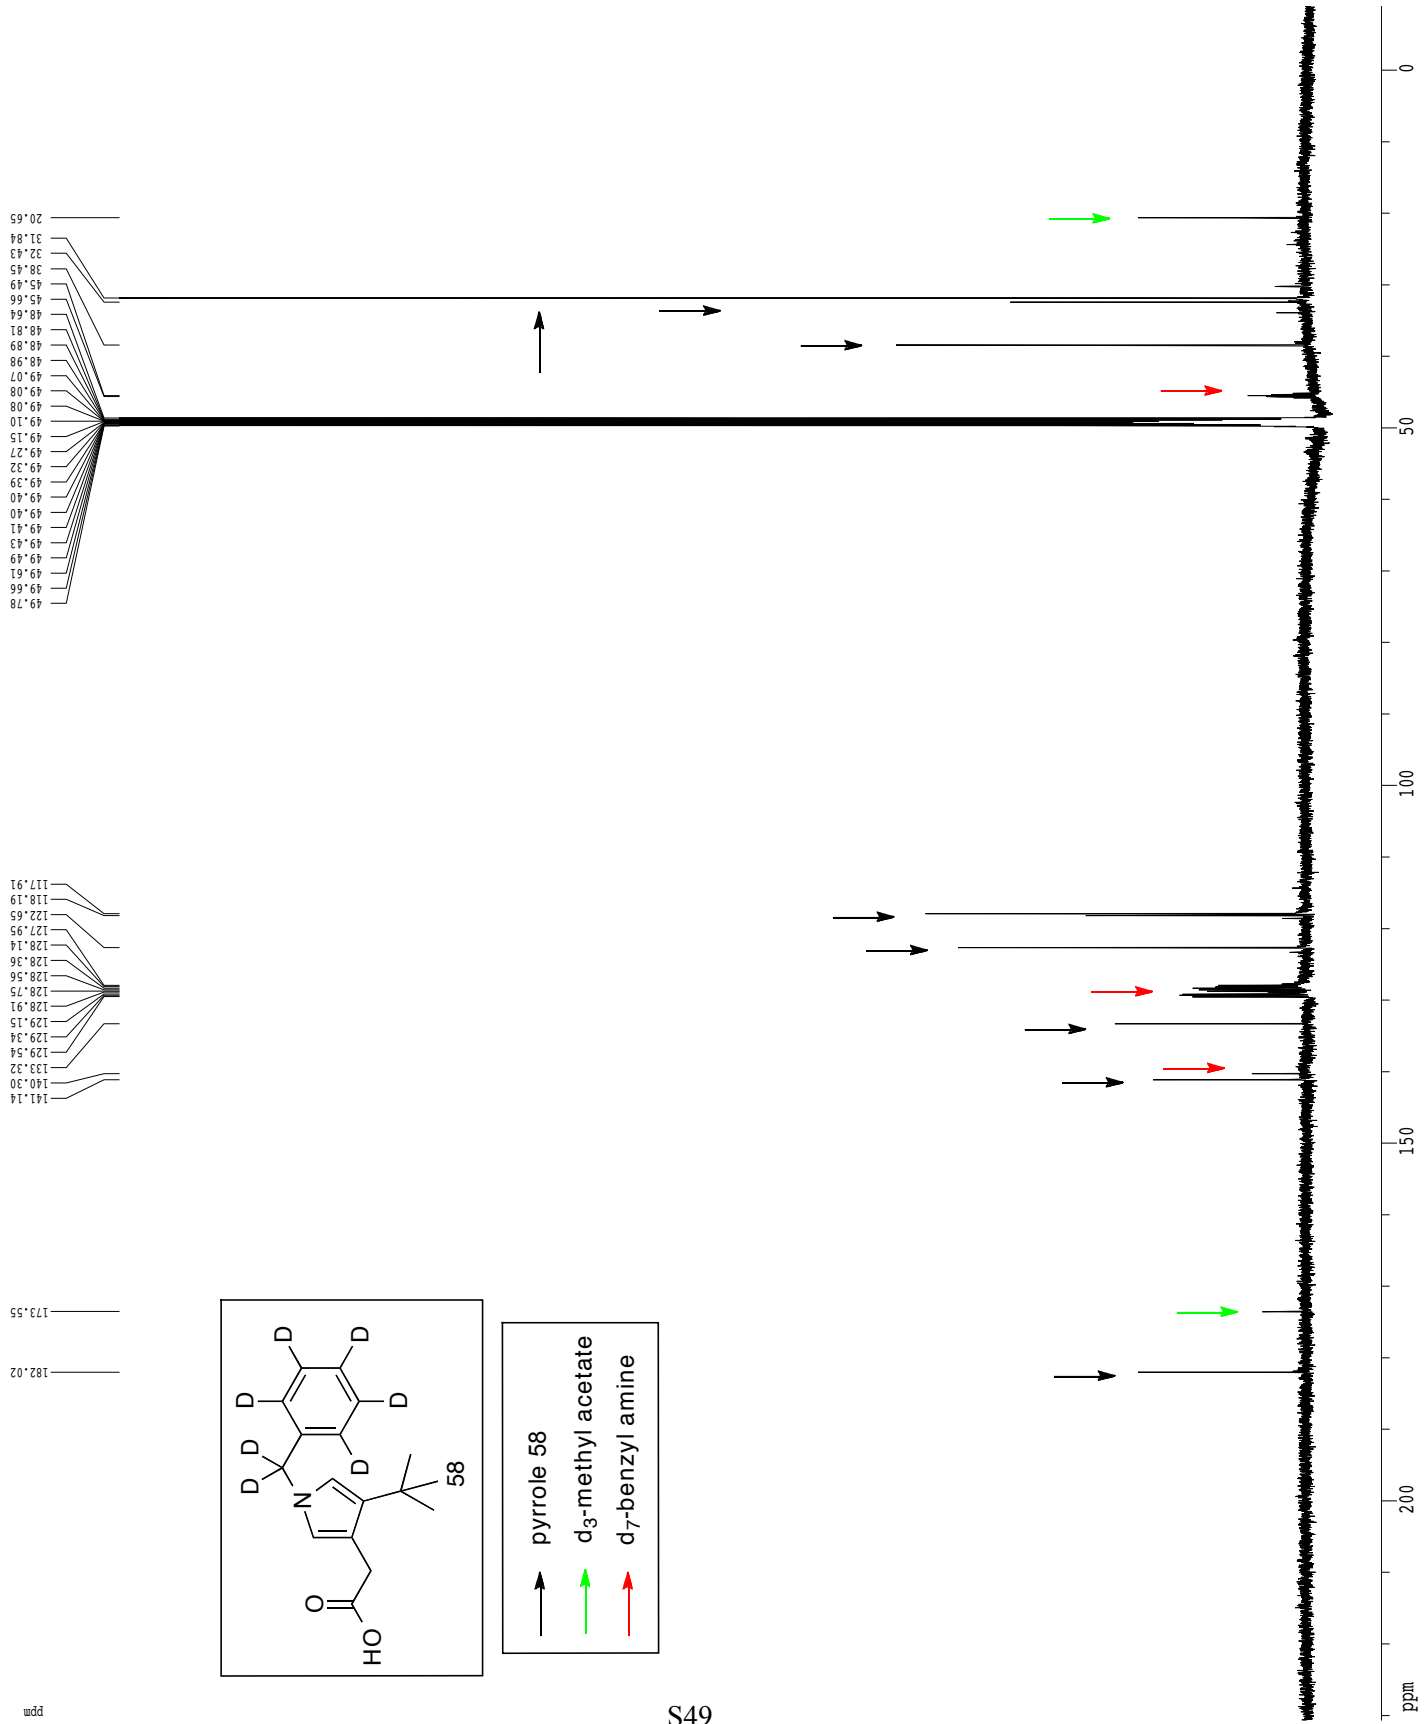

Current Data Parameters  
 Date\_ 20110602  
 Time 6:31  
 User csp  
 EXPNO 7  
 PROCNO 1  
 F2 - Acquisition Parameters  
 Date\_ 20110602  
 Time 6:31  
 User csp  
 PULPROG zgpg30  
 PROBR1 5 mm CPCTH  
 PULPROG2 spinechopgpgp.prd  
 TD 65536  
 SOLVENT CDCl3  
 NS 5120  
 DS 16  
 SWH 30303.0 Hz  
 FIDRES 0.462388 Hz  
 AQ 1.0613840 sec  
 RG 7296.2  
 DW 16.500 usec  
 DE 6.00 usec  
 TE 298.0 K  
 D1 2.0000000 sec  
 d11 1.0000000 sec  
 D16 0.0002000 sec  
 d17 0.00019600 sec  
 d17 0.00019600 sec  
 MCREST 0.0000000 sec  
 MCNRRK 0.01500000 sec  
 P2 31.00 usec

===== CHANNEL F1 =====  
 NUC1 <sup>13</sup>C  
 P1 15.50 usec  
 P11 500.00 usec  
 P12 2000.00 usec  
 PL0 120.00 dB  
 PL1 -1.00 dB  
 SFO1 125.7942348 MHz  
 SF2 500.1362800 MHz  
 SP2 3.20 dB  
 SPNAM1 Crp60.0.5.20.1  
 SPNAM2 Crp60comp.4  
 SFOFF1 0.00 Hz  
 SFOFF2 0.00 Hz

===== CHANNEL F2 =====  
 NUC2 <sup>13</sup>C  
 P1 15.50 usec  
 P11 500.00 usec  
 P12 2000.00 usec  
 PL0 120.00 dB  
 PL1 -1.00 dB  
 SFO1 125.7942348 MHz  
 SF2 500.1362800 MHz  
 SP2 3.20 dB  
 SPNAM1 Crp60.0.5.20.1  
 SPNAM2 Crp60comp.4  
 SFOFF1 0.00 Hz  
 SFOFF2 0.00 Hz

===== GRADIENT CHANNEL =====  
 GBNAM1 SINE.100  
 GBNAM2 SINE.100  
 GPC1 0.00 %  
 GPC2 0.00 %  
 GPF1 0.00 %  
 GPF2 0.00 %  
 GPC3 30.00 %  
 GPC4 500.00 usec  
 P15 500.00 usec  
 P16 1000.00 usec

F2 - Processing parameters  
 SI 65536  
 SF 125.7602256 MHz  
 CHW 8  
 SSB 0  
 LB 1.00 Hz  
 GB 0  
 PC 2.00  
 ID NMR plot parameters  
 CX 2280 cm  
 CY 2280 cm  
 F1P 230.637 cm  
 F1 29009.63 Hz  
 F2P -10.387 ppm  
 F2 -1293.96 Hz  
 PPMCM 10.56688 ppm/cm  
 HZCM 1329.10510 Hz/cm
